# Supplementary material for: Different Approaches of Forest Type Classifications for Argentina Based on Functional Forests and Canopy-Cover Composition by Tree Species
Source: Preprints.org preprint supplement (doi:10.20944/preprints202402.1482.v1), 2024-02-26
Supplement: Supplementary file 1 [file supplementary]

**Supplementary Material**

**Figure S1**. Characterization of the forest types (Level 1, FT-1) at each forest region (TDF+PAT = Tierra del Fuego and Continental forests along the Andes Mountains, ESP = Espinal forests, MON = Monte forests, PCH = Parque Chaqueño forests, YUN = Yunga rainforests, AF = Atlantic forests) according to annual mean temperature (AMT, °C) and annual precipitation (AP, mm.yr-1). Red dots indicated means and bars showed the standard deviation for both axes. Acronyms are presented in Annex 4.

**
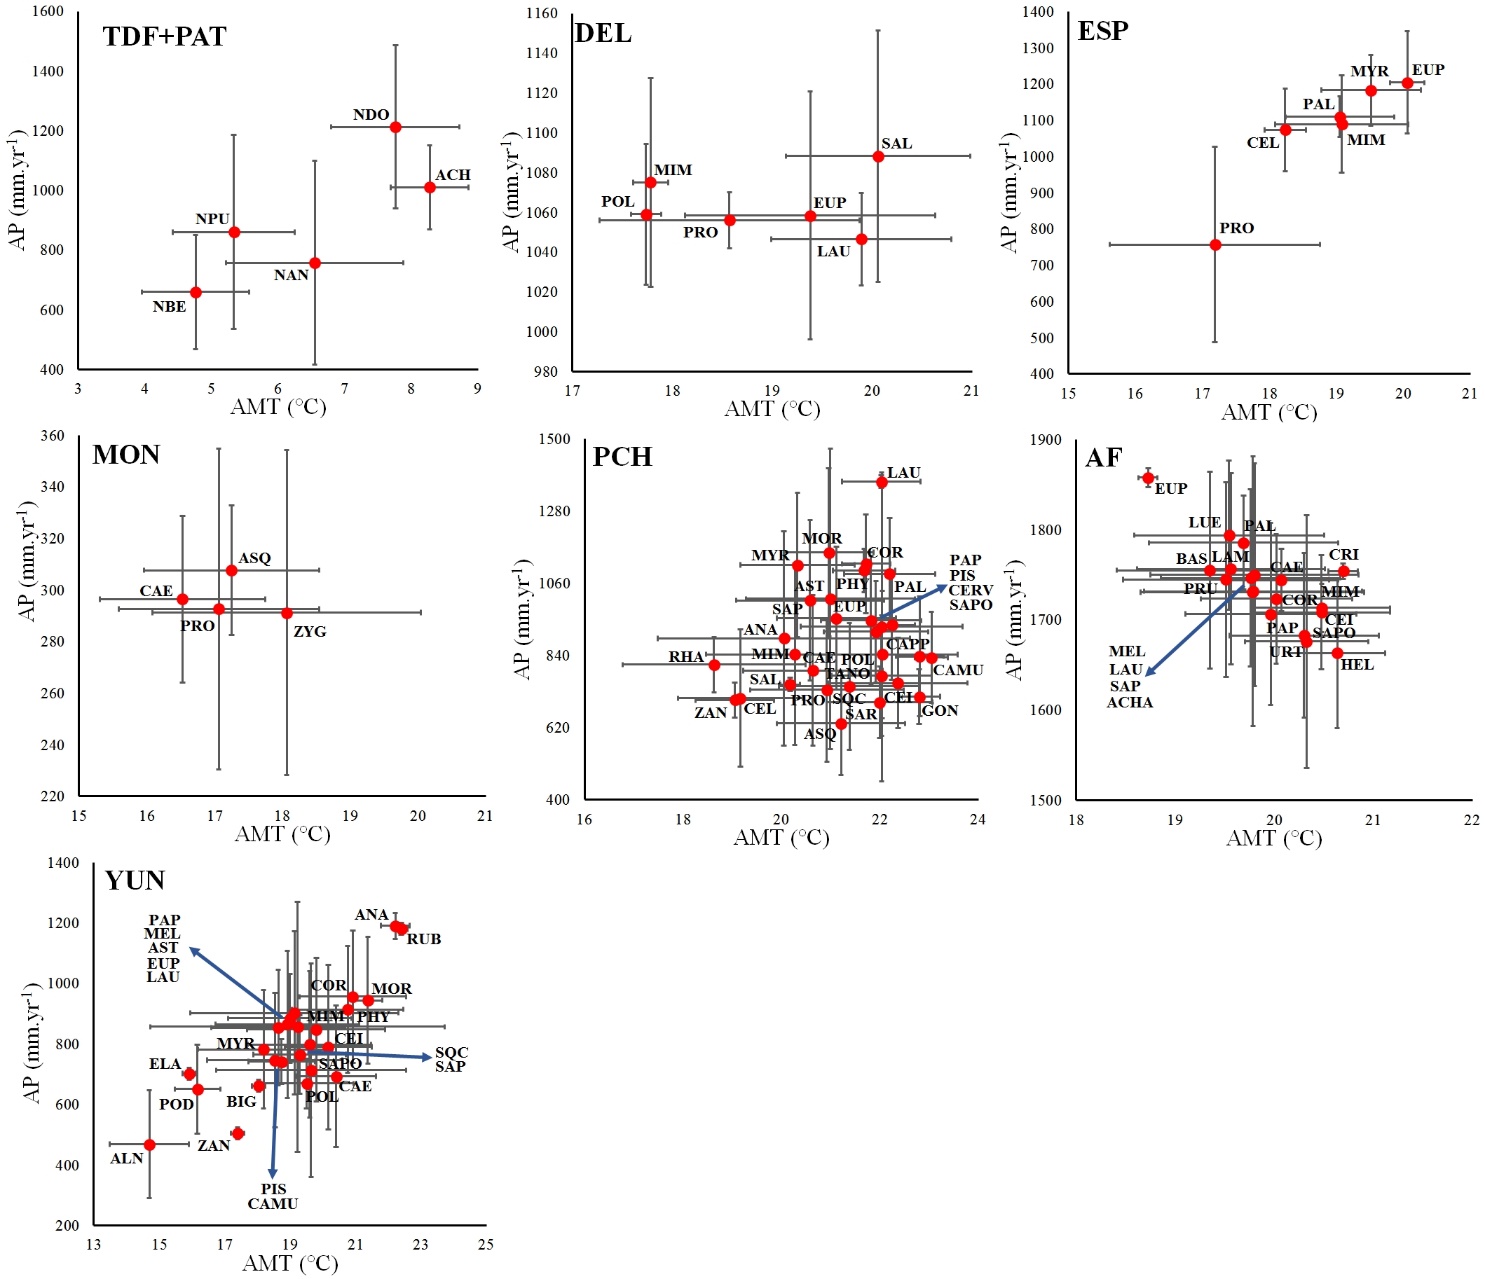
**

**Table S2**. Taxonomy of the tree forest species identified in the plots of the Second National Forest Inventory.

| ***Genus*** | **Species** | **Family** | **Division** |
| --- | --- | --- | --- |
| *Acanthosyris* | *falcata* | Cervantesiaceae | Angiosperm |
| *Acanthosyris* | *spinescens* | Cervantesiaceae | Angiosperm |
| *Achatocarpus* | *praecox* | Achatocarpaceae | Angiosperm |
| *Acrocomia* | *aculeata* | Arecaceae | Angiosperm |
| *Actinostemon* | *concolor* | Euphorbiaceae | Angiosperm |
| *Agonandra* | *excelsa* | Opiliaceae | Angiosperm |
| *Aiouea* | *amoena* | Lauraceae | Angiosperm |
| *Albizia* | *inundata* | Fabaceae | Angiosperm |
| *Albizia* | *niopoides* | Fabaceae | Angiosperm |
| *Alchornea* | *glandulosa* | Euphorbiaceae | Angiosperm |
| *Alchornea* | *triplinervia* | Euphorbiaceae | Angiosperm |
| *Allenrolfea* | *vaginata* | Chenopodiaceae | Angiosperm |
| *Allophylus* | *edulis* | Sapindaceae | Angiosperm |
| *Alnus* | *acuminata* | Betulaceae | Angiosperm |
| *Aloysia* | *gratissima* | Verbenaceae | Angiosperm |
| *Aloysia* | *virgata* | Verbenaceae | Angiosperm |
| *Anadenanthera* | *colubrina* | Fabaceae | Angiosperm |
| *Anarthrophyllum* | *capitatum* | Fabaceae | Angiosperm |
| *Anisocapparis* | *speciosa* | Capparaceae | Angiosperm |
| *Annona* | *emarginata* | Annonaceae | Angiosperm |
| *Annona* | *neosalicifolia* | Annonaceae | Angiosperm |
| *Annona* | *rugulosa* | Annonaceae | Angiosperm |
| *Apuleia* | *leiocarpa* | Fabaceae | Angiosperm |
| *Aralia* | *soratensis* | Araliaceae | Angiosperm |
| *Aralia* | *warmingiana* | Araliaceae | Angiosperm |
| *Araucaria* | *angustifolia* | Araucariaceae | Gymnosperm |
| *Araucaria* | *araucana* | Araucariaceae | Gymnosperm |
| *Archidasyphyllum* | *diacanthoides* | Asteraceae | Angiosperm |
| *Aristotelia* | *chilensis* | Elaeocarpaceae | Angiosperm |
| *Aspidosperma* | *australe* | Apocynaceae | Angiosperm |
| *Aspidosperma* | *polyneuron* | Apocynaceae | Angiosperm |
| *Aspidosperma* | *quebracho-blanco* | Apocynaceae | Angiosperm |
| *Aspidosperma* | *triternatum* | Apocynaceae | Angiosperm |
| *Atamisquea* | *emarginata* | Capparaceae | Angiosperm |
| *Ateleia* | *glazioveana* | Fabaceae | Angiosperm |
| *Athyana* | *weinmanniifolia* | Sapindaceae | Angiosperm |
| *Atriplex* | *cordubensis* | Chenopodiaceae | Angiosperm |
| *Atriplex* | *lampa* | Chenopodiaceae | Angiosperm |
| *Atriplex* | *undulata* | Chenopodiaceae | Angiosperm |
| *Austrocedrus* | *chilensis* | Cupressaceae | Gymnosperm |
| *Azara* | *microphylla* | Salicaceae | Angiosperm |
| *Azara* | *salicifolia* | Salicaceae | Angiosperm |
| *Baccharis* | *dracunculifolia* | Asteraceae | Angiosperm |
| *Baccharis* | *salicifolia* | Asteraceae | Angiosperm |
| *Baccharis* | *tucumanensis* | Asteraceae | Angiosperm |
| *Balfourodendron* | *riedelianum* | Rutaceae | Angiosperm |
| *Banara* | *tomentosa* | Salicaceae | Angiosperm |
| *Bastardiopsis* | *densiflora* | Malvaceae | Angiosperm |
| *Bauhinia* | *forficata* | Fabaceae | Angiosperm |
| *Bauhinia* | *microstachya* | Fabaceae | Angiosperm |
| *Berberis* | *commutata* | Berberidaceae | Angiosperm |
| *Berberis* | *laurina* | Berberidaceae | Angiosperm |
| *Berberis* | *microphylla* | Berberidaceae | Angiosperm |
| *Blepharocalyx* | *salicifolius* | Myrtaceae | Angiosperm |
| *Boehmeria* | *caudata* | Urticaceae | Angiosperm |
| *Bougainvillea* | *campanulata* | Nyctaginaceae | Angiosperm |
| *Bougainvillea* | *praecox* | Nyctaginaceae | Angiosperm |
| *Bougainvillea* | *spinosa* | Nyctaginaceae | Angiosperm |
| *Bougainvillea* | *stipitata* | Nyctaginaceae | Angiosperm |
| *Bulnesia* | *foliosa* | Zygophyllaceae | Angiosperm |
| *Bulnesia* | *retama* | Zygophyllaceae | Angiosperm |
| *Bulnesia* | *schickendantzii* | Zygophyllaceae | Angiosperm |
| *Butia* | *yatay* | Arecaceae | Angiosperm |
| *Cabralea* | *canjerana* | Meliaceae | Angiosperm |
| *Cenostigma* | *pluviosa* | Fabaceae | Angiosperm |
| *Calliandra* | *foliolosa* | Fabaceae | Angiosperm |
| *Calycophyllum* | *multiflorum* | Rubiaceae | Angiosperm |
| *Campomanesia* | *guazumifolia* | Myrtaceae | Angiosperm |
| *Campomanesia* | *xanthocarpa* | Myrtaceae | Angiosperm |
| *Capparicordis* | *tweediana* | Capparaceae | Angiosperm |
| *Capsicum* | *recurvatum* | Solanaceae | Angiosperm |
| *Carica* | *glandulosa* | Caricaceae | Angiosperm |
| *Carica* | *quercifolia* | Caricaceae | Angiosperm |
| *Cascaronia* | *astragalina* | Fabaceae | Angiosperm |
| *Casearia* | *catharinensis* | Salicaceae | Angiosperm |
| *Casearia* | *decandra* | Salicaceae | Angiosperm |
| *Casearia* | *sylvestris* | Salicaceae | Angiosperm |
| *Castela* | *coccinea* | Simaroubaceae | Angiosperm |
| *Cecropia* | *pachystachya* | Urticaceae | Angiosperm |
| *Cedrela* | *angustifolia* | Meliaceae | Angiosperm |
| *Cedrela* | *balansae* | Meliaceae | Angiosperm |
| *Cedrela* | *fissilis* | Meliaceae | Angiosperm |
| *Cedrela* | *saltensis* | Meliaceae | Angiosperm |
| *Ceiba* | *chodatii* | Malvaceae | Angiosperm |
| *Ceiba* | *speciosa* | Malvaceae | Angiosperm |
| *Celtis* | *chichape* | Cannabaceae | Angiosperm |
| *Celtis* | *ehrenbergiana* | Cannabaceae | Angiosperm |
| *Celtis* | *iguanaea* | Cannabaceae | Angiosperm |
| *Celtis* | *pallida* | Cannabaceae | Angiosperm |
| *Cephalanthus* | *glabratus* | Rubiaceae | Angiosperm |
| *Cestrum* | *laevigatum* | Solanaceae | Angiosperm |
| *Chloroleucon* | *chacoense* | Fabaceae | Angiosperm |
| *Chloroleucon* | *foliolosum* | Fabaceae | Angiosperm |
| *Chloroleucon* | *tenuiflorum* | Fabaceae | Angiosperm |
| *Chomelia* | *obtusa* | Rubiaceae | Angiosperm |
| *Chrysophyllum* | *gonocarpum* | Sapotaceae | Angiosperm |
| *Chrysophyllum* | *marginatum* | Sapotaceae | Angiosperm |
| *Citharexylum* | *joergensenii* | Verbenaceae | Angiosperm |
| *Citharexylum* | *montevidense* | Verbenaceae | Angiosperm |
| *Citronella* | *paniculata* | Cardiopteridaceae | Angiosperm |
| *Cnicothamnus* | *lorentzii* | Asteraceae | Angiosperm |
| *Cnidoscolus* | *vitifolius* | Euphorbiaceae | Angiosperm |
| *Coccoloba* | *cordata* | Polygonaceae | Angiosperm |
| *Coccoloba* | *tiliacea* | Polygonaceae | Angiosperm |
| *Cochlospermum* | *tetraporum* | Bixaceae | Angiosperm |
| *Condalia* | *buxifolia* | Rhamnaceae | Angiosperm |
| *Condalia* | *microphylla* | Rhamnaceae | Angiosperm |
| *Copernicia* | *alba* | Arecaceae | Angiosperm |
| *Cordia* | *americana* | Boraginaceae | Angiosperm |
| *Cordia* | *ecalyculata* | Boraginaceae | Angiosperm |
| *Cordia* | *saccelia* | Boraginaceae | Angiosperm |
| *Cordia* | *trichotoma* | Boraginaceae | Angiosperm |
| *Coutarea* | *hexandra* | Rubiaceae | Angiosperm |
| *Crinodendron* | *tucumanum* | Elaeocarpaceae | Angiosperm |
| *Croton* | *piluliferus* | Euphorbiaceae | Angiosperm |
| *Croton* | *urucurana* | Euphorbiaceae | Angiosperm |
| *Cupania* | *vernalis* | Sapindaceae | Angiosperm |
| *Cybistax* | *antisyphilitica* | Bignoniaceae | Angiosperm |
| *Cynophalla* | *flexuosa* | Capparaceae | Angiosperm |
| *Cynophalla* | *retusa* | Capparaceae | Angiosperm |
| *Dasyphyllum* | *brasiliense* | Asteraceae | Angiosperm |
| *Dendropanax* | *cuneatus* | Araliaceae | Angiosperm |
| *Diatenopteryx* | *sorbifolia* | Sapindaceae | Angiosperm |
| *Didymopanax* | *morototoni* | Araliaceae | Angiosperm |
| *Diostea* | *juncea* | Verbenaceae | Angiosperm |
| *Diplokeleba* | *floribunda* | Sapindaceae | Angiosperm |
| *Discaria* | *chacaye* | Rhamnaceae | Angiosperm |
| *Drimys* | *winteri* | Winteraceae | Angiosperm |
| *Duranta* | *serratifolia* | Verbenaceae | Angiosperm |
| *Embothrium* | *coccineum* | Proteaceae | Angiosperm |
| *Enterolobium* | *contortisiliquum* | Fabaceae | Angiosperm |
| *Erythrina* | *crista-galli* | Fabaceae | Angiosperm |
| *Erythrina* | *falcata* | Fabaceae | Angiosperm |
| *Erythroxylum* | *argentinum* | Erythroxylaceae | Angiosperm |
| *Erythroxylum* | *cuneifolium* | Erythroxylaceae | Angiosperm |
| *Erythroxylum* | *deciduum* | Erythroxylaceae | Angiosperm |
| *Erythroxylum* | *microphyllum* | Erythroxylaceae | Angiosperm |
| *Escallonia* | *millegrana* | Escalloniaceae | Angiosperm |
| *Eugenia* | *burkartiana* | Myrtaceae | Angiosperm |
| *Eugenia* | *hyemalis* | Myrtaceae | Angiosperm |
| *Eugenia* | *involucrata* | Myrtaceae | Angiosperm |
| *Eugenia* | *mattosii* | Myrtaceae | Angiosperm |
| *Eugenia* | *moraviana* | Myrtaceae | Angiosperm |
| *Eugenia* | *myrcianthes* | Myrtaceae | Angiosperm |
| *Eugenia* | *pitanga* | Myrtaceae | Angiosperm |
| *Eugenia* | *psidiiflora* | Myrtaceae | Angiosperm |
| *Eugenia* | *punicifolia* | Myrtaceae | Angiosperm |
| *Eugenia* | *pyriformis* | Myrtaceae | Angiosperm |
| *Eugenia* | *repanda* | Myrtaceae | Angiosperm |
| *Eugenia* | *speciosa* | Myrtaceae | Angiosperm |
| *Eugenia* | *uniflora* | Myrtaceae | Angiosperm |
| *Eugenia* | *uruguayensis* | Myrtaceae | Angiosperm |
| *Euterpe* | *edulis* | Arecaceae | Angiosperm |
| *Fagara* | *chiloperone* | Rutaceae | Angiosperm |
| *Ficus* | *citrifolia* | Moraceae | Angiosperm |
| *Ficus* | *luschnathiana* | Moraceae | Angiosperm |
| *Ficus* | *maroma* | Moraceae | Angiosperm |
| *Flourensia* | *fiebrigii* | Asteraceae | Angiosperm |
| *Geoffroea* | *decorticans* | Fabaceae | Angiosperm |
| *Gleditsia* | *amorphoides* | Fabaceae | Angiosperm |
| *Gochnatia* | *palosanto* | Asteraceae | Angiosperm |
| *Gomidesia* | *barituensis* | Myrtaceae | Angiosperm |
| *Gonopterodendron* | *bonariensis* | Zygophyllaceae | Angiosperm |
| *Gonopterodendron* | *sarmientoi* | Zygophyllaceae | Angiosperm |
| *Guarea* | *kunthiana* | Meliaceae | Angiosperm |
| *Guarea* | *macrophylla* | Meliaceae | Angiosperm |
| *Guazuma* | *ulmifolia* | Malvaceae | Angiosperm |
| *Guettarda* | *uruguensis* | Rubiaceae | Angiosperm |
| *Handroanthus* | *albus* | Bignoniaceae | Angiosperm |
| *Handroanthus* | *heptaphyllus* | Bignoniaceae | Angiosperm |
| *Handroanthus* | *impetiginosus* | Bignoniaceae | Angiosperm |
| *Handroanthus* | *lapacho* | Bignoniaceae | Angiosperm |
| *Handroanthus* | *ochraceus* | Bignoniaceae | Angiosperm |
| *Helietta* | *apiculata* | Rutaceae | Angiosperm |
| *Heliocarpus* | *popayanensis* | Malvaceae | Angiosperm |
| *Hennecartia* | *omphalandra* | Monimiaceae | Angiosperm |
| *Holocalyx* | *balansae* | Fabaceae | Angiosperm |
| *Ilex* | *argentina* | Aquifoliaceae | Angiosperm |
| *Ilex* | *brevicuspis* | Aquifoliaceae | Angiosperm |
| *Ilex* | *paraguariensis* | Aquifoliaceae | Angiosperm |
| *Inga* | *affinis* | Fabaceae | Angiosperm |
| *Inga* | *edulis* | Fabaceae | Angiosperm |
| *Inga* | *marginata* | Fabaceae | Angiosperm |
| *Inga* | *saltensis* | Fabaceae | Angiosperm |
| *Inga* | *uraguensis* | Fabaceae | Angiosperm |
| *Jacaranda* | *micrantha* | Bignoniaceae | Angiosperm |
| *Jacaranda* | *mimosifolia* | Bignoniaceae | Angiosperm |
| *Jacaratia* | *spinosa* | Caricaceae | Angiosperm |
| *Jatropha* | *hieronymi* | Euphorbiaceae | Angiosperm |
| *Jodina* | *rhombifolia* | Cervantesiaceae | Angiosperm |
| *Juglans* | *australis* | Juglandaceae | Angiosperm |
| *Juglans* | *regia* | Juglandaceae | Angiosperm |
| *Kageneckia* | *lanceolata* | Rosaceae | Angiosperm |
| *Lachesiodendron* | *viridiflorum* | Fabaceae | Angiosperm |
| *Larrea* | *cuneifolia* | Zygophyllaceae | Angiosperm |
| *Larrea* | *divaricata* | Zygophyllaceae | Angiosperm |
| *Laureliopsis* | *philippiana* | Atherospermataceae | Angiosperm |
| *Libidibia* | *paraguariensis* | Fabaceae | Angiosperm |
| *Lithraea* | *molleoides* | Anacardiaceae | Angiosperm |
| *Lomatia* | *hirsuta* | Proteaceae | Angiosperm |
| *Lonchocarpus* | *lilloi* | Fabaceae | Angiosperm |
| *Lonchocarpus* | *muehlbergianus* | Fabaceae | Angiosperm |
| *Lonchocarpus* | *nitidus* | Fabaceae | Angiosperm |
| *Loxopterygium* | *grisebachii* | Anacardiaceae | Angiosperm |
| *Luehea* | *divaricata* | Malvaceae | Angiosperm |
| *Lycium* | *boerhaviaefolium* | Solanaceae | Angiosperm |
| *Lycium* | *cestroides* | Solanaceae | Angiosperm |
| *Lycium* | *chilense* | Solanaceae | Angiosperm |
| *Lycium* | *cuneatum* | Solanaceae | Angiosperm |
| *Lycium* | *morongii* | Solanaceae | Angiosperm |
| *Lycium* | *tenuispinosum* | Solanaceae | Angiosperm |
| *Machaerium* | *paraguariense* | Fabaceae | Angiosperm |
| *Machaerium* | *stipitatum* | Fabaceae | Angiosperm |
| *Maclura* | *tinctoria* | Moraceae | Angiosperm |
| *Malvastrum* | *uniapiculatum* | Malvaceae | Angiosperm |
| *Mandevilla* | *immaculata* | Apocynaceae | Angiosperm |
| *Matayba* | *elaeagnoides* | Sapindaceae | Angiosperm |
| *Maytenus* | *boaria* | Celastraceae | Angiosperm |
| *Maytenus* | *viscifolia* | Celastraceae | Angiosperm |
| *Maytenus* | *vitis-idaea* | Celastraceae | Angiosperm |
| *Miconia* | *molybdaea* | Melastomataceae | Angiosperm |
| *Microlobius* | *foetidus* | Fabaceae | Angiosperm |
| *Mimosa* | *bimucronata* | Fabaceae | Angiosperm |
| *Mimosa* | *bonplandii* | Fabaceae | Angiosperm |
| *Mimosa* | *candelabrum* | Fabaceae | Angiosperm |
| *Mimosa* | *debilis* | Fabaceae | Angiosperm |
| *Mimosa* | *detinens* | Fabaceae | Angiosperm |
| *Mimosa* | *ostenii* | Fabaceae | Angiosperm |
| *Mimozyganthus* | *carinatus* | Fabaceae | Angiosperm |
| *Monteverdia* | *ilicifolia* | Celastraceae | Angiosperm |
| *Monteverdia* | *spinosa* | Celastraceae | Angiosperm |
| *Morus* | *insignis* | Moraceae | Angiosperm |
| *Muellera* | *campestris* | Fabaceae | Angiosperm |
| *Muntingia* | *calabura* | Muntingiaceae | Angiosperm |
| *Myracrodruon* | *balansae* | Anacardiaceae | Angiosperm |
| *Myracrodruon* | *urundeuva* | Anacardiaceae | Angiosperm |
| *Myrceugenia* | *lanceolata* | Myrtaceae | Angiosperm |
| *Myrcia* | *pubiflora* | Myrtaceae | Angiosperm |
| *Myrcianthes* | *cisplatensis* | Myrtaceae | Angiosperm |
| *Myrcianthes* | *mato* | Myrtaceae | Angiosperm |
| *Myrcianthes* | *minimifolia* | Myrtaceae | Angiosperm |
| *Myrcianthes* | *pseudomato* | Myrtaceae | Angiosperm |
| *Myrcianthes* | *pungens* | Myrtaceae | Angiosperm |
| *Myriocarpa* | *stipitata* | Urticaceae | Angiosperm |
| *Myrocarpus* | *frondosus* | Fabaceae | Angiosperm |
| *Myroxylon* | *peruiferum* | Fabaceae | Angiosperm |
| *Myrrhinium* | *atropurpureum* | Myrtaceae | Angiosperm |
| *Myrsine* | *balansae* | Myrtaceae | Angiosperm |
| *Myrsine* | *coriacea* | Myrtaceae | Angiosperm |
| *Myrsine* | *laetevirens* | Myrtaceae | Angiosperm |
| *Myrsine* | *parvula* | Myrtaceae | Angiosperm |
| *Nectandra* | *angusta* | Lauraceae | Angiosperm |
| *Nectandra* | *angustifolia* | Lauraceae | Angiosperm |
| *Nectandra* | *cuspidata* | Lauraceae | Angiosperm |
| *Nectandra* | *lanceolata* | Lauraceae | Angiosperm |
| *Nectandra* | *membranacea* | Lauraceae | Angiosperm |
| *Nicotiana* | *glauca* | Solanaceae | Angiosperm |
| *Nothofagus* | *alpina* | Nothofagaceae | Angiosperm |
| *Nothofagus* | *antarctica* | Nothofagaceae | Angiosperm |
| *Nothofagus* | *betuloides* | Nothofagaceae | Angiosperm |
| *Nothofagus* | *dombeyi* | Nothofagaceae | Angiosperm |
| *Nothofagus* | *obliqua* | Nothofagaceae | Angiosperm |
| *Nothofagus* | *pumilio* | Nothofagaceae | Angiosperm |
| *Ochetophila* | *trinervis* | Lauraceae | Angiosperm |
| *Ocotea* | *acutifolia* | Lauraceae | Angiosperm |
| *Ocotea* | *lancifolia* | Lauraceae | Angiosperm |
| *Ocotea* | *porphyria* | Lauraceae | Angiosperm |
| *Ocotea* | *puberula* | Lauraceae | Angiosperm |
| *Oreopanax* | *kuntzei* | Araliaceae | Angiosperm |
| *Parapiptadenia* | *excelsa* | Fabaceae | Angiosperm |
| *Parapiptadenia* | *rigida* | Fabaceae | Angiosperm |
| *Parasenegalia* | *visco* | Fabaceae | Angiosperm |
| *Parkinsonia* | *aculeata* | Fabaceae | Angiosperm |
| *Parkinsonia* | *praecox* | Fabaceae | Angiosperm |
| *Parodiodendron* | *marginivillosum* | Picrodendraceae | Angiosperm |
| *Peltophorum* | *dubium* | Fabaceae | Angiosperm |
| *Philyra* | *brasiliensis* | Euphorbiaceae | Angiosperm |
| *Phoradendron* | *habrostachyum* | Viscaceae | Angiosperm |
| *Phyllanthus* | *chacoensis* | Phyllanthaceae | Angiosperm |
| *Phyllostylon* | *rhamnoides* | Ulmaceae | Angiosperm |
| *Phytolacca* | *dioica* | Phytolaccaceae | Angiosperm |
| *Picrasma* | *crenata* | Simaroubaceae | Angiosperm |
| *Pilocarpus* | *pennatifolius* | Rutaceae | Angiosperm |
| *Piper* | *hieronymi* | Piperaceae | Angiosperm |
| *Piper* | *tucumanum* | Piperaceae | Angiosperm |
| *Piptadenia* | *viridiflora* | Fabaceae | Angiosperm |
| *Pisonia* | *zapallo* | Nyctaginaceae | Angiosperm |
| *Plectrocarpa* | *tetracantha* | Zygophyllaceae | Angiosperm |
| *Plinia* | *rivularis* | Myrtaceae | Angiosperm |
| *Podocarpus* | *nubigenus* | Podocarpaceae | Gymnosperm |
| *Podocarpus* | *parlatorei* | Podocarpaceae | Gymnosperm |
| *Pogonopus* | *tubulosus* | Rubiaceae | Angiosperm |
| *Porlieria* | *microphylla* | Zygophyllaceae | Angiosperm |
| *Pouteria* | *gardneriana* | Sapotaceae | Angiosperm |
| *Pouteria* | *glomerata* | Sapotaceae | Angiosperm |
| *Pouteria* | *salicifolia* | Sapotaceae | Angiosperm |
| *Prosopis* | *affinis* | Fabaceae | Angiosperm |
| *Prosopis* | *alba* | Fabaceae | Angiosperm |
| *Prosopis* | *alpataco* | Fabaceae | Angiosperm |
| *Prosopis* | *argentina* | Fabaceae | Angiosperm |
| *Prosopis* | *caldenia* | Fabaceae | Angiosperm |
| *Prosopis* | *chilensis* | Fabaceae | Angiosperm |
| *Prosopis* | *elata* | Fabaceae | Angiosperm |
| *Prosopis* | *ferox* | Fabaceae | Angiosperm |
| *Prosopis* | *flexuosa* | Fabaceae | Angiosperm |
| *Prosopis* | *hassleri* | Fabaceae | Angiosperm |
| *Prosopis* | *kuntzei* | Fabaceae | Angiosperm |
| *Prosopis* | *nigra* | Fabaceae | Angiosperm |
| *Prosopis* | *rubiflora* | Fabaceae | Angiosperm |
| *Prosopis* | *ruizleali* | Fabaceae | Angiosperm |
| *Prosopis* | *ruscifolia* | Fabaceae | Angiosperm |
| *Prosopis* | *sericantha* | Fabaceae | Angiosperm |
| *Prosopis* | *torquata* | Fabaceae | Angiosperm |
| *Prosopis* | *vinalillo* | Fabaceae | Angiosperm |
| *Prunus* | *brasiliensis* | Rosaceae | Angiosperm |
| *Prunus* | *subcoriacea* | Rosaceae | Angiosperm |
| *Prunus* | *tucumanensis* | Rosaceae | Angiosperm |
| *Pseudobombax* | *argentinum* | Malvaceae | Angiosperm |
| *Psidium* | *guajava* | Myrtaceae | Angiosperm |
| *Psidium* | *striatulum* | Myrtaceae | Angiosperm |
| *Pterogyne* | *nitens* | Fabaceae | Angiosperm |
| *Quillaja* | *brasiliensis* | Quillajaceae | Angiosperm |
| *Ramorinoa* | *girolae* | Fabaceae | Angiosperm |
| *Randia* | *ferox* | Rubiaceae | Angiosperm |
| *Randia* | *micracantha* | Rubiaceae | Angiosperm |
| *Rauvolfia* | *schuelii* | Apocynaceae | Angiosperm |
| *Rauvolfia* | *sellowii* | Apocynaceae | Angiosperm |
| *Rhamnus* | *sphaerosperma* | Rhamnaceae | Angiosperm |
| *Rhaphithamnus* | *spinosus* | Verbenaceae | Angiosperm |
| *Roupala* | *meisneri* | Proteaceae | Angiosperm |
| *Rubus* | *brasiliensis* | Rosaceae | Angiosperm |
| *Ruprechtia* | *apetala* | Polygonaceae | Angiosperm |
| *Ruprechtia* | *brachysepala* | Polygonaceae | Angiosperm |
| *Ruprechtia* | *laxiflora* | Polygonaceae | Angiosperm |
| *Ruprechtia* | *salicifolia* | Polygonaceae | Angiosperm |
| *Salix* | *humboldtiana* | Salicaceae | Angiosperm |
| *Salta* | *triflora* | Polygonaceae | Angiosperm |
| *Sambucus* | *australis* | Viburnaceae | Angiosperm |
| *Sambucus* | *nigra* | Viburnaceae | Angiosperm |
| *Sambucus* | *peruviana* | Viburnaceae | Angiosperm |
| *Sapindus* | *saponaria* | Sapindaceae | Angiosperm |
| *Sapium* | *glandulosum* | Euphorbiaceae | Angiosperm |
| *Sapium* | *haematospermum* | Euphorbiaceae | Angiosperm |
| *Sarcomphalus* | *mistol* | Rhamnaceae | Angiosperm |
| *Sarcotoxicum* | *salicifolium* | Capparaceae | Angiosperm |
| *Schaefferia* | *argentinensis* | Celastraceae | Angiosperm |
| *Schinopsis* | *balansae* | Anacardiaceae | Angiosperm |
| *Schinopsis* | *heterophylla* | Anacardiaceae | Angiosperm |
| *Schinopsis* | *lorentzii* | Anacardiaceae | Angiosperm |
| *Schinus* | *areira* | Anacardiaceae | Angiosperm |
| *Schinus* | *bumelioides* | Anacardiaceae | Angiosperm |
| *Schinus* | *fasciculatus* | Anacardiaceae | Angiosperm |
| *Schinus* | *gracilipes* | Anacardiaceae | Angiosperm |
| *Schinus* | *lentiscifolius* | Anacardiaceae | Angiosperm |
| *Schinus* | *longifolius* | Anacardiaceae | Angiosperm |
| *Schinus* | *marchandii* | Anacardiaceae | Angiosperm |
| *Schinus* | *meyeri* | Anacardiaceae | Angiosperm |
| *Schinus* | *molle* | Anacardiaceae | Angiosperm |
| *Schinus* | *myrtifolius* | Anacardiaceae | Angiosperm |
| *Schinus* | *patagonicus* | Anacardiaceae | Angiosperm |
| *Schinus* | *piliferus* | Anacardiaceae | Angiosperm |
| *Schinus* | *polygamus* | Anacardiaceae | Angiosperm |
| *Schinus* | *praecox* | Anacardiaceae | Angiosperm |
| *Schinus* | *roigii* | Anacardiaceae | Angiosperm |
| *Schinus* | *sp.* | Anacardiaceae | Angiosperm |
| *Schinus* | *spinosus* | Anacardiaceae | Angiosperm |
| *Schinus* | *terebinthifolius* | Anacardiaceae | Angiosperm |
| *Scutia* | *buxifolia* | Rhamnaceae | Angiosperm |
| *Sebastiania* | *argutidens* | Euphorbiaceae | Angiosperm |
| *Sebastiania* | *brasiliensis* | Euphorbiaceae | Angiosperm |
| *Sebastiania* | *commersoniana* | Euphorbiaceae | Angiosperm |
| *Seguieria* | *aculeata* | Petiveraceae | Angiosperm |
| *Senegalia* | *bonariensis* | Fabaceae | Angiosperm |
| *Senegalia* | *fiebrigii* | Fabaceae | Angiosperm |
| *Senegalia* | *gilliesii* | Fabaceae | Angiosperm |
| *Senegalia* | *martii* | Fabaceae | Angiosperm |
| *Senegalia* | *polyphylla* | Fabaceae | Angiosperm |
| *Senegalia* | *praecox* | Fabaceae | Angiosperm |
| *Senegalia* | *tucumanensis* | Fabaceae | Angiosperm |
| *Senna* | *aphylla* | Fabaceae | Angiosperm |
| *Senna* | *spectabilis* | Fabaceae | Angiosperm |
| *Serjania* | *foveata* | Sapindaceae | Angiosperm |
| *Sideroxylon* | *obtusifolium* | Sapotaceae | Angiosperm |
| *Siphoneugena* | *occidentalis* | Myrtaceae | Angiosperm |
| *Solanum* | *aligerum* | Solanaceae | Angiosperm |
| *Solanum* | *granulosum-leprosum* | Solanaceae | Angiosperm |
| *Solanum* | *pseudoquina* | Solanaceae | Angiosperm |
| *Solanum* | *riparium* | Solanaceae | Angiosperm |
| *Solanum* | *sanctae-catharinae* | Solanaceae | Angiosperm |
| *Sorocea* | *bonplandii* | Moraceae | Angiosperm |
| *Sorocea* | *sprucei* | Moraceae | Angiosperm |
| *Strychnos* | *brasiliensis* | Loganiaceae | Angiosperm |
| *Styrax* | *leprosus* | Styracaceae | Angiosperm |
| *Styrax* | *subargenteus* | Styracaceae | Angiosperm |
| *Suaeda* | *divaricata* | Chenopodiaceae | Angiosperm |
| *Syagrus* | *romanzoffiana* | Arecaceae | Angiosperm |
| *Symplocos* | *uniflora* | Symplocaceae | Angiosperm |
| *Tabebuia* | *aurea* | Bignoniaceae | Angiosperm |
| *Tabebuia* | *nodosa* | Bignoniaceae | Angiosperm |
| *Tabernaemontana* | *catharinensis* | Apocynaceae | Angiosperm |
| *Tachigali* | *aurea* | Fabaceae | Angiosperm |
| *Tamarix* | *ramosissima* | Tamaricaceae | Angiosperm |
| *Tecoma* | *stans* | Bignoniaceae | Angiosperm |
| *Terminalia* | *australis* | Combretaceae | Angiosperm |
| *Terminalia* | *catappa* | Combretaceae | Angiosperm |
| *Terminalia* | *triflora* | Combretaceae | Angiosperm |
| *Tessaria* | *integrifolia* | Asteraceae | Angiosperm |
| *Tetrorchidium* | *rubrivenium* | Euphorbiaceae | Angiosperm |
| *Tipuana* | *tipu* | Fabaceae | Angiosperm |
| *Trema* | *micrantha* | Cannabaceae | Angiosperm |
| *Trichilia* | *catigua* | Meliaceae | Angiosperm |
| *Trichilia* | *claussenii* | Meliaceae | Angiosperm |
| *Trichilia* | *elegans* | Meliaceae | Angiosperm |
| *Trithrinax* | *campestris* | Arecaceae | Angiosperm |
| *Trithrinax* | *schizophylla var. bif.* | Arecaceae | Angiosperm |
| *Trithrinax* | *schyzophylla* | Arecaceae | Angiosperm |
| *Trithrinax* | *schyzophylla var. sch.* | Arecaceae | Angiosperm |
| *Urera* | *baccifera* | Urticaceae | Angiosperm |
| *Urera* | *caracasana* | Urticaceae | Angiosperm |
| *Vachellia* | *albicorticata* | Fabaceae | Angiosperm |
| *Vachellia* | *aroma* | Fabaceae | Angiosperm |
| *Vachellia* | *astringens* | Fabaceae | Angiosperm |
| *Vachellia* | *caven* | Fabaceae | Angiosperm |
| *Vachellia* | *macracantha* | Fabaceae | Angiosperm |
| *Vallesia* | *glabra* | Fabaceae | Angiosperm |
| *Vasconcellea* | *quercifolia* | Caricaceae | Angiosperm |
| *Vassobia* | *breviflora* | Solanaceae | Angiosperm |
| *Viburnum* | *seemenii* | Viburnaceae | Angiosperm |
| *Vitex* | *megapotamica* | Lamiaceae | Angiosperm |
| *Weinmannia* | *boliviensis* | Cunoniaceae | Angiosperm |
| *Ximenia* | *americana* | Olacaceae | Angiosperm |
| *Xylosma* | *longipetiolata* | Salicaceae | Angiosperm |
| *Xylosma* | *pseudosalzmanii* | Salicaceae | Angiosperm |
| *Xylosma* | *pubescens* | Salicaceae | Angiosperm |
| *Xylosma* | *tweediana* | Salicaceae | Angiosperm |
| *Xylosma* | *venosa* | Salicaceae | Angiosperm |
| *Zanthoxylum* | *coco* | Rutaceae | Angiosperm |
| *Zanthoxylum* | *fagara* | Rutaceae | Angiosperm |
| *Zanthoxylum* | *petiolare* | Rutaceae | Angiosperm |
| *Zanthoxylum* | *rhoifolium* | Rutaceae | Angiosperm |
| *Zuccagnia* | *punctata* | Fabaceae | Angiosperm |

**Table S3.** Plots of the Second National Forest Inventory classified by forest types (Level 1, FT-1) and forest regions (TDF+PAT = Tierra del Fuego and Continental forests along the Andes Mountains, DEL = Delta and islands of Paraná river, ESP = Espinal forests, MON = Monte forests, PCH = Parque Chaqueño forests, YUN = Yunga rainforests, AF = Atlantic forests). Acronyms of each forest type were presented.

| **Region** | **Level 1** | **Acronym** | **Plots** | % |
| --- | --- | --- | --- | --- |
| TDF+PAT | *Austrocedrus chilensis + others* | ACH | 7 | 3.0% |
| 6.1% | *Nothofagus antarctica + others* | NAN | 54 | 23.5% |
|  | *Nothofagus betuloides + others* | NBE | 10 | 4.3% |
|  | *Nothofagus dombeyi + others* | NDO | 24 | 10.4% |
|  | *Nothofagus pumilio + others* | NPU | 135 | 58.7% |
| DEL | *Euphorbiaceae + others* | EUP | 5 | 27.8% |
| 0.5% | *Lauraceae + others* | LAU | 2 | 11.1% |
|  | *Mimosoideae + others* | MIM | 2 | 11.1% |
|  | *Polygonaceae + others* | POL | 2 | 11.1% |
|  | *Prosopis + others* | PRO | 2 | 11.1% |
|  | *Salicaceae + others* | SAL | 5 | 27.8% |
| ESP | *Celtis + others* | CEL | 8 | 3.2% |
| 6.6% | *Euphorbiaceae + others* | EUP | 8 | 3.2% |
|  | *Mimosoideae + others* | MIM | 38 | 15.1% |
|  | *Myrtaceae + others* | MYR | 16 | 6.4% |
|  | *Palmera + others* | PAL | 11 | 4.4% |
|  | *Prosopis + others* | PRO | 170 | 67.7% |
| MON | *Aspidosperma quebracho-blanco + others* | ASQ | 5 | 5.4% |
| 2.4% | *Caesalpinoideae + others* | CAE | 7 | 7.6% |
|  | *Prosopis + others* | PRO | 70 | 76.1% |
|  | *Zygophyllaceae + others* | ZYG | 10 | 10.9% |
| PCH | *Anacardiaceae + others* | ANA | 31 | 1.1% |
| 72.4% | *Aspidosperma quebracho-blanco + others* | ASQ | 628 | 22.8% |
|  | *Asteraceae + others* | AST | 2 | 0.1% |
|  | *Caesalpinoideae + others* | CAE | 152 | 5.5% |
|  | *Calycophyllum multiflorum + others* | CAMU | 9 | 0.3% |
|  | *Capparaceae + others* | CAPP | 4 | 0.1% |
|  | *Ceiba + others* | CEI | 85 | 3.1% |
|  | *Celtis + others* | CEL | 24 | 0.9% |
|  | *Cervantesiaceae + others* | CERV | 8 | 0.3% |
|  | *Cordia + others* | COR | 26 | 0.9% |
|  | *Euphorbiaceae + others* | EUP | 17 | 0.6% |
|  | *Gonopterodendron sarmientoi + others* | GON | 83 | 3.0% |
|  | *Lauraceae + others* | LAU | 2 | 0.1% |
|  | *Mimosoideae + others* | MIM | 182 | 6.6% |
|  | *Moraceae + others* | MOR | 7 | 0.3% |
|  | *Myrtaceae + others* | MYR | 11 | 0.4% |
|  | *Palmera + others* | PAL | 95 | 3.5% |
|  | *Papilionoideae + others* | PAP | 2 | 0.1% |
|  | *Phyllostylon rhamnoides + others* | PHY | 17 | 0.6% |
|  | *Pisonia zapallo + others* | PIS | 17 | 0.6% |
|  | *Polygonaceae + others* | POL | 124 | 4.5% |
|  | *Prosopis + others* | PRO | 586 | 21.3% |
|  | *Rhamnaceae + others* | RHA | 6 | 0.2% |
|  | *Salicaceae + others* | SAL | 1 | 0.0% |
|  | *Sapindaceae + others* | SAP | 10 | 0.4% |
|  | *Sapotaceae + others* | SAPO | 30 | 1.1% |
|  | *Sarcomphalus mistol + others* | SAR | 246 | 8.9% |
|  | *Schinopsis + others* | SQC | 254 | 9.2% |
|  | *Tabebuia nodosa + others* | TANO | 89 | 3.2% |
|  | *Zanthoxylum + others* | ZAN | 2 | 0.1% |
| AF | *Achatocarpaceae + others* | ACHA | 3 | 1.8% |
| 4.3% | *Bastardiopsis densiflora + otra* | BAS | 10 | 6.1% |
|  | *Caesalpinoideae + others* | CAE | 6 | 3.7% |
|  | *Caricaceae + others* | CEI | 2 | 1.2% |
|  | *Ceiba + others* | CRI | 2 | 1.2% |
|  | *Cordia + others* | COR | 17 | 10.4% |
|  | *Euphorbiaceae + others* | EUP | 2 | 1.2% |
|  | *Helieta apiculata + others* | HEL | 6 | 3.7% |
|  | *Lamiaceae + others* | LAM | 4 | 2.4% |
|  | *Lauraceae + others* | LAU | 44 | 26.8% |
|  | *Luehea divaricata + others* | LUE | 10 | 6.1% |
|  | *Meliaceae + others* | MEL | 5 | 3.0% |
|  | *Mimosoideae + others* | MIM | 6 | 3.7% |
|  | *Palmera + others* | PAL | 4 | 2.4% |
|  | *Papilionoideae + others* | PAP | 15 | 9.1% |
|  | *Prunus + others* | PRU | 8 | 4.9% |
|  | *Sapindaceae + others* | SAP | 10 | 6.1% |
|  | *Sapotaceae + others* | SAPO | 8 | 4.9% |
|  | *Urticaceae + others* | URT | 2 | 1.2% |
| YUN | *Alnus acuminata + others* | ALN | 22 | 7.5% |
| 7.8% | *Anacardiaceae + others* | ANA | 3 | 1.0% |
|  | *Asteraceae + others* | AST | 2 | 0.7% |
|  | *Bignoniaceae + others* | BIG | 1 | 0.3% |
|  | *Caesalpinoideae + others* | CAE | 7 | 2.4% |
|  | *Calycophyllum multiflorum + others* | CAMU | 11 | 3.7% |
|  | *Ceiba + others* | CEI | 5 | 1.7% |
|  | *Cordia + others* | COR | 9 | 3.1% |
|  | *Elaeocarpaceae + others* | ELA | 1 | 0.3% |
|  | *Euphorbiaceae + others* | EUP | 5 | 1.7% |
|  | *Lauraceae + others* | LAU | 22 | 7.5% |
|  | *Meliaceae + others* | MEL | 12 | 4.1% |
|  | *Mimosoideae + others* | MIM | 80 | 27.1% |
|  | *Moraceae + others* | MOR | 4 | 1.4% |
|  | *Myrtaceae + others* | MYR | 33 | 11.2% |
|  | *Papilionoideae + others* | PAP | 2 | 0.7% |
|  | *Phyllostylon rhamnoides + others* | PHY | 21 | 7.1% |
|  | *Pisonia zapallo + others* | PIS | 7 | 2.4% |
|  | *Podocarpus parlatorei + others* | POD | 15 | 5.1% |
|  | *Polygonaceae + others* | POL | 6 | 2.0% |
|  | *Rubiaceae + others* | RUB | 1 | 0.3% |
|  | *Sapindaceae + others* | SAP | 9 | 3.1% |
|  | *Sapotaceae + others* | SAPO | 3 | 1.0% |
|  | *Schinopsis + others* | SQC | 13 | 4.4% |
|  | *Zanthoxylum + others* | ZAN | 1 | 0.3% |

**Table S4.** Plots of the Second National Forest Inventory classified by forest types (Level 2 and 3, FT-2 and FT-3) and forest regions (TDF+PAT = Tierra del Fuego and Continental forests along the Andes Mountains, DEL = Delta and islands of Paraná river, ESP = Espinal forests, MON = Monte forests, PCH = Parque Chaqueño forests, YUN = Yunga rainforests, AF = Atlantic forests).

|  | **Level 2 in titles and Level 3 with numbers** | **TDF+PAT** | **DEL** | **ESP** | **MON** |  | **PCH** | **AF** | **YUN** | **Total** |
| --- | --- | --- | --- | --- | --- | --- | --- | --- | --- | --- |
| ***Achatocarpaceae + others*** | |  |  |  |  |  |  |  |  |  |
| 1 | *Achatocarpus praecox* |  |  |  |  |  |  | 1 |  | 1 |
| 2 | *Achatocarpus praecox+Bastardiopsis densiflora+Allophylus edulis+Phytolacca dioica* |  |  |  |  |  |  | 1 |  | 1 |
| 3 | *Achatocarpus praecox+Erythrina falcata+Trichilia claussenii+Machaerium stipitatum* |  |  |  |  |  |  | 1 |  | 1 |
| ***Alnus acuminata + others*** | |  |  |  |  |  |  |  |  |  |
| 4 | *Allophylus edulis+Alnus acuminata+Blepharocalyx salicifolius* |  |  |  |  |  |  |  | 1 | 1 |
| 5 | *Alnus acuminata* |  |  |  |  |  |  |  | 16 | 16 |
| 6 | *Alnus acuminata+Podocarpus parlatorei* |  |  |  |  |  |  |  | 1 | 1 |
| 7 | *Alnus acuminata+Podocarpus parlatorei+Parapiptadenia excelsa* |  |  |  |  |  |  |  | 1 | 1 |
| 8 | *Cordia americana+Alnus acuminata* |  |  |  |  |  |  |  | 1 | 1 |
| 9 | *Prunus tucumanensis+Alnus acuminata* |  |  |  |  |  |  |  | 1 | 1 |
| 10 | *Xylosma pubescens+Alnus acuminata+Zanthoxylum coco* |  |  |  |  |  |  |  | 1 | 1 |
| ***Anacardiaceae + others*** | |  |  |  |  |  |  |  |  |  |
| 11 | *Lithraea molleoides* |  |  |  |  |  | 1 |  |  | 1 |
| 12 | *Lithraea molleoides+Allophylus edulis+Xylosma longipetiolata* |  |  |  |  |  | 1 |  |  | 1 |
| 13 | *Lithraea molleoides+Celtis ehrenbergiana* |  |  |  |  |  | 2 |  |  | 2 |
| 14 | *Lithraea molleoides+Prosopis alba* |  |  |  |  |  | 1 |  |  | 1 |
| 15 | *Lithraea molleoides+Vachellia caven* |  |  |  |  |  | 1 |  |  | 1 |
| 16 | *Lithraea molleoides+Vachellia caven+Kageneckia lanceolata* |  |  |  |  |  | 1 |  |  | 1 |
| 17 | *Myracrodruon balansae+Chrysophyllum marginatum+Syagrus romanzoffiana* |  |  |  |  |  | 1 |  |  | 1 |
| 18 | *Myracrodruon balansae+Cordia americana* |  |  |  |  |  | 2 |  |  | 2 |
| 19 | *Myracrodruon balansae+Cordia americana+Diplokeleba floribunda* |  |  |  |  |  | 1 |  |  | 1 |
| 20 | *Myracrodruon balansae+Cordia americana+Diplokeleba floribunda+Zanthoxylum petiolare* |  |  |  |  |  | 1 |  |  | 1 |
| 21 | *Myracrodruon balansae+Cordia americana+Prosopis nigra* |  |  |  |  |  | 1 |  |  | 1 |
| 22 | *Myracrodruon balansae+Gleditsia amorphoides+Myrcianthes pungens+Handroanthus heptaphyllus* |  |  |  |  |  | 1 |  |  | 1 |
| 23 | *Myracrodruon balansae+Gleditsia amorphoides+Phyllostylon rhamnoides* |  |  |  |  |  | 1 |  |  | 1 |
| 24 | *Myracrodruon balansae+Phyllostylon rhamnoides+Eugenia punicifolia* |  |  |  |  |  | 1 |  |  | 1 |
| 25 | *Myracrodruon balansae+Prosopis nigra+Nectandra angustifolia+Libidibia paraguariensis* |  |  |  |  |  | 1 |  |  | 1 |
| 26 | *Myracrodruon balansae+Prosopis nigra+Schinus longifolius* |  |  |  |  |  | 1 |  |  | 1 |
| 27 | *Myracrodruon balansae+Syagrus romanzoffiana+Schinopsis balansae* |  |  |  |  |  | 1 |  |  | 1 |
| 28 | *Myracrodruon urundeuva+Anadenanthera colubrina+Athyana weinmanniifolia* |  |  |  |  |  |  |  | 1 | 1 |
| 29 | *Myracrodruon urundeuva+Anadenanthera colubrina+Phyllostylon rhamnoides+Cedrela balansae* |  |  |  |  |  |  |  | 1 | 1 |
| 30 | *Myracrodruon urundeuva+Cedrela balansae+Handroanthus impetiginosus* |  |  |  |  |  |  |  | 1 | 1 |
| 31 | *Schinus areira* |  |  |  |  |  | 1 |  |  | 1 |
| 32 | *Schinus fasciculatus* |  |  |  |  |  | 1 |  |  | 1 |
| 33 | *Schinus fasciculatus+Senegalia praecox+Phytolacca dioica* |  |  |  |  |  | 1 |  |  | 1 |
| 34 | *Schinus gracilipes+Sarcomphalus mistol+Prosopis alba* |  |  |  |  |  | 1 |  |  | 1 |
| 35 | *Schinus longifolius+Aspidosperma quebracho-blanco* |  |  |  |  |  | 1 |  |  | 1 |
| 36 | *Schinus longifolius+Aspidosperma quebracho-blanco+Sarcomphalus mistol* |  |  |  |  |  | 1 |  |  | 1 |
| 37 | *Schinus longifolius+Bougainvillea stipitata* |  |  |  |  |  | 1 |  |  | 1 |
| 38 | *Schinus longifolius+Prosopis nigra+Prosopis vinalillo* |  |  |  |  |  | 1 |  |  | 1 |
| 39 | *Schinus longifolius+Sarcomphalus mistol+Aspidosperma quebracho-blanco* |  |  |  |  |  | 1 |  |  | 1 |
| 40 | *Schinus longifolius+Senegalia praecox* |  |  |  |  |  | 1 |  |  | 1 |
| 41 | *Schinus molle+Sarcomphalus mistol* |  |  |  |  |  | 1 |  |  | 1 |
| 42 | *Schinus piliferus+Geoffroea decorticans+Prosopis nigra* |  |  |  |  |  | 1 |  |  | 1 |
| ***Aspidosperma quebracho-blanco + others*** | |  |  |  |  |  |  |  |  |  |
| 43 | *Aspidosperma quebracho-blanco* |  |  |  | 1 |  | 119 |  |  | 120 |
| 44 | *Aspidosperma quebracho-blanco+Atamisquea emarginata* |  |  |  |  |  | 1 |  |  | 1 |
| 45 | *Aspidosperma quebracho-blanco+Atamisquea emarginata+Prosopis nigra+Sarcomphalus mistol* |  |  |  |  |  | 1 |  |  | 1 |
| 46 | *Aspidosperma quebracho-blanco+Bougainvillea campanulata+Geoffroea decorticans+Senegalia gilliesii* |  |  |  |  |  | 1 |  |  | 1 |
| 47 | *Aspidosperma quebracho-blanco+Bougainvillea praecox+Prosopis kuntzei+Schinopsis lorentzii* |  |  |  |  |  | 1 |  |  | 1 |
| 48 | *Aspidosperma quebracho-blanco+Bougainvillea praecox+Sarcomphalus mistol+Vachellia aroma* |  |  |  |  |  | 1 |  |  | 1 |
| 49 | *Aspidosperma quebracho-blanco+Bougainvillea praecox+Tabebuia nodosa* |  |  |  |  |  | 2 |  |  | 2 |
| 50 | *Aspidosperma quebracho-blanco+Bulnesia retama* |  |  |  |  |  | 2 |  |  | 2 |
| 51 | *Aspidosperma quebracho-blanco+Castela coccinea+Jodina rhombifolia* |  |  |  |  |  | 1 |  |  | 1 |
| 52 | *Aspidosperma quebracho-blanco+Castela coccinea+Prosopis flexuosa* |  |  |  |  |  | 1 |  |  | 1 |
| 53 | *Aspidosperma quebracho-blanco+Castela coccinea+Senegalia gilliesii* |  |  |  |  |  | 1 |  |  | 1 |
| 54 | *Aspidosperma quebracho-blanco+Ceiba chodatii+Gonopterodendron sarmientoi* |  |  |  |  |  | 1 |  |  | 1 |
| 55 | *Aspidosperma quebracho-blanco+Celtis ehrenbergiana+Prosopis nigra* |  |  |  |  |  | 1 |  |  | 1 |
| 56 | *Aspidosperma quebracho-blanco+Condalia microphylla* |  |  |  |  |  | 2 |  |  | 2 |
| 57 | *Aspidosperma quebracho-blanco+Cynophalla retusa+Prosopis kuntzei+Sarcomphalus mistol* |  |  |  |  |  | 1 |  |  | 1 |
| 58 | *Aspidosperma quebracho-blanco+Geoffroea decorticans* |  |  |  |  |  | 1 |  |  | 1 |
| 59 | *Aspidosperma quebracho-blanco+Geoffroea decorticans+Prosopis nigra+Schinopsis lorentzii* |  |  |  |  |  | 1 |  |  | 1 |
| 60 | *Aspidosperma quebracho-blanco+Gonopterodendron sarmientoi* |  |  |  |  |  | 6 |  |  | 6 |
| 61 | *Aspidosperma quebracho-blanco+Gonopterodendron sarmientoi+Acanthosyris falcata* |  |  |  |  |  | 1 |  |  | 1 |
| 62 | *Aspidosperma quebracho-blanco+Gonopterodendron sarmientoi+Aspidosperma triternatum+Bougainvillea praecox* |  |  |  |  |  | 1 |  |  | 1 |
| 63 | *Aspidosperma quebracho-blanco+Gonopterodendron sarmientoi+Bougainvillea praecox* |  |  |  |  |  | 1 |  |  | 1 |
| 64 | *Aspidosperma quebracho-blanco+Gonopterodendron sarmientoi+Castela coccinea* |  |  |  |  |  | 1 |  |  | 1 |
| 65 | *Aspidosperma quebracho-blanco+Gonopterodendron sarmientoi+Ceiba chodatii* |  |  |  |  |  | 1 |  |  | 1 |
| 66 | *Aspidosperma quebracho-blanco+Gonopterodendron sarmientoi+Ceiba chodatii+Salta triflora* |  |  |  |  |  | 1 |  |  | 1 |
| 67 | *Aspidosperma quebracho-blanco+Gonopterodendron sarmientoi+Cynophalla retusa+Bougainvillea stipitata* |  |  |  |  |  | 1 |  |  | 1 |
| 68 | *Aspidosperma quebracho-blanco+Gonopterodendron sarmientoi+Salta triflora* |  |  |  |  |  | 2 |  |  | 2 |
| 69 | *Aspidosperma quebracho-blanco+Gonopterodendron sarmientoi+Sarcomphalus mistol* |  |  |  |  |  | 3 |  |  | 3 |
| 70 | *Aspidosperma quebracho-blanco+Gonopterodendron sarmientoi+Sarcomphalus mistol+Prosopis ruscifolia* |  |  |  |  |  | 1 |  |  | 1 |
| 71 | *Aspidosperma quebracho-blanco+Gonopterodendron sarmientoi+Sarcomphalus mistol+Salta triflora* |  |  |  |  |  | 1 |  |  | 1 |
| 72 | *Aspidosperma quebracho-blanco+Gonopterodendron sarmientoi+Schinopsis lorentzii* |  |  |  |  |  | 1 |  |  | 1 |
| 73 | *Aspidosperma quebracho-blanco+Gonopterodendron sarmientoi+Schinopsis lorentzii+Salta triflora* |  |  |  |  |  | 1 |  |  | 1 |
| 74 | *Aspidosperma quebracho-blanco+Larrea divaricata* |  |  |  |  |  | 1 |  |  | 1 |
| 75 | *Aspidosperma quebracho-blanco+Libidibia paraguariensis* |  |  |  |  |  | 3 |  |  | 3 |
| 76 | *Aspidosperma quebracho-blanco+Libidibia paraguariensis+Ceiba chodatii+Tabebuia nodosa* |  |  |  |  |  | 1 |  |  | 1 |
| 77 | *Aspidosperma quebracho-blanco+Libidibia paraguariensis+Gonopterodendron sarmientoi* |  |  |  |  |  | 1 |  |  | 1 |
| 78 | *Aspidosperma quebracho-blanco+Libidibia paraguariensis+Gonopterodendron sarmientoi+Bougainvillea praecox* |  |  |  |  |  | 1 |  |  | 1 |
| 79 | *Aspidosperma quebracho-blanco+Libidibia paraguariensis+Salta triflora* |  |  |  |  |  | 1 |  |  | 1 |
| 80 | *Aspidosperma quebracho-blanco+Libidibia paraguariensis+Schinopsis lorentzii* |  |  |  |  |  | 3 |  |  | 3 |
| 81 | *Aspidosperma quebracho-blanco+Libidibia paraguariensis+Schinus fasciculatus* |  |  |  |  |  | 1 |  |  | 1 |
| 82 | *Aspidosperma quebracho-blanco+Libidibia paraguariensis+Tabebuia nodosa+Bougainvillea praecox* |  |  |  |  |  | 1 |  |  | 1 |
| 83 | *Aspidosperma quebracho-blanco+Lithraea molleoides+Mimosa detinens* |  |  |  |  |  | 1 |  |  | 1 |
| 84 | *Aspidosperma quebracho-blanco+Maytenus vitis-idaea* |  |  |  |  |  | 1 |  |  | 1 |
| 85 | *Aspidosperma quebracho-blanco+Myracrodruon balansae+Prosopis alba* |  |  |  |  |  | 1 |  |  | 1 |
| 86 | *Aspidosperma quebracho-blanco+Nectandra angustifolia+Copernicia alba* |  |  |  |  |  | 1 |  |  | 1 |
| 87 | *Aspidosperma quebracho-blanco+Parkinsonia praecox* |  |  |  |  |  | 26 |  |  | 26 |
| 88 | *Aspidosperma quebracho-blanco+Parkinsonia praecox+Celtis chichape+Sarcomphalus mistol* |  |  |  |  |  | 1 |  |  | 1 |
| 89 | *Aspidosperma quebracho-blanco+Parkinsonia praecox+Prosopis kuntzei* |  |  |  |  |  | 1 |  |  | 1 |
| 90 | *Aspidosperma quebracho-blanco+Parkinsonia praecox+Prosopis nigra* |  |  |  |  |  | 1 |  |  | 1 |
| 91 | *Aspidosperma quebracho-blanco+Parkinsonia praecox+Sarcomphalus mistol* |  |  |  |  |  | 1 |  |  | 1 |
| 92 | *Aspidosperma quebracho-blanco+Parkinsonia praecox+Senegalia praecox+Libidibia paraguariensis* |  |  |  |  |  | 1 |  |  | 1 |
| 93 | *Aspidosperma quebracho-blanco+Pisonia zapallo+Gleditsia amorphoides+Senegalia praecox* |  |  |  |  |  | 1 |  |  | 1 |
| 94 | *Aspidosperma quebracho-blanco+Pisonia zapallo+Schinopsis balansae+Sideroxylon obtusifolium* |  |  |  |  |  | 1 |  |  | 1 |
| 95 | *Aspidosperma quebracho-blanco+Prosopis alba* |  |  |  |  |  | 2 |  |  | 2 |
| 96 | *Aspidosperma quebracho-blanco+Prosopis alba+Castela coccinea* |  |  |  |  |  | 1 |  |  | 1 |
| 97 | *Aspidosperma quebracho-blanco+Prosopis alba+Sideroxylon obtusifolium* |  |  |  |  |  | 1 |  |  | 1 |
| 98 | *Aspidosperma quebracho-blanco+Prosopis flexuosa* |  |  |  |  |  | 28 |  |  | 28 |
| 99 | *Aspidosperma quebracho-blanco+Prosopis flexuosa+Prosopis torquata* |  |  |  |  |  | 1 |  |  | 1 |
| 100 | *Aspidosperma quebracho-blanco+Prosopis flexuosa+Prosopis torquata+Maytenus viscifolia* |  |  |  |  |  | 1 |  |  | 1 |
| 101 | *Aspidosperma quebracho-blanco+Prosopis kuntzei* |  |  |  |  |  | 4 |  |  | 4 |
| 102 | *Aspidosperma quebracho-blanco+Prosopis kuntzei+Prosopis flexuosa* |  |  |  |  |  | 1 |  |  | 1 |
| 103 | *Aspidosperma quebracho-blanco+Prosopis kuntzei+Salta triflora* |  |  |  |  |  | 1 |  |  | 1 |
| 104 | *Aspidosperma quebracho-blanco+Prosopis nigra* |  |  |  | 1 |  | 29 |  |  | 30 |
| 105 | *Aspidosperma quebracho-blanco+Prosopis nigra+Libidibia paraguariensis* |  |  |  |  |  | 1 |  |  | 1 |
| 106 | *Aspidosperma quebracho-blanco+Prosopis nigra+Parkinsonia praecox* |  |  |  |  |  | 2 |  |  | 2 |
| 107 | *Aspidosperma quebracho-blanco+Prosopis nigra+Parkinsonia praecox+Schinopsis lorentzii* |  |  |  |  |  | 1 |  |  | 1 |
| 108 | *Aspidosperma quebracho-blanco+Prosopis nigra+Sarcomphalus mistol* |  |  |  |  |  | 2 |  |  | 2 |
| 109 | *Aspidosperma quebracho-blanco+Prosopis nigra+Schinopsis lorentzii* |  |  |  |  |  | 3 |  |  | 3 |
| 110 | *Aspidosperma quebracho-blanco+Prosopis nigra+Senegalia gilliesii* |  |  |  |  |  | 1 |  |  | 1 |
| 111 | *Aspidosperma quebracho-blanco+Prosopis nigra+Vachellia aroma* |  |  |  |  |  | 1 |  |  | 1 |
| 112 | *Aspidosperma quebracho-blanco+Prosopis nigra+Vachellia caven* |  |  |  |  |  | 1 |  |  | 1 |
| 113 | *Aspidosperma quebracho-blanco+Prosopis ruscifolia* |  |  |  |  |  | 2 |  |  | 2 |
| 114 | *Aspidosperma quebracho-blanco+Prosopis ruscifolia+Sarcomphalus mistol* |  |  |  |  |  | 1 |  |  | 1 |
| 115 | *Aspidosperma quebracho-blanco+Prosopis ruscifolia+Schinopsis lorentzii* |  |  |  |  |  | 1 |  |  | 1 |
| 116 | *Aspidosperma quebracho-blanco+Prosopis torquata* |  |  |  |  |  | 9 |  |  | 9 |
| 117 | *Aspidosperma quebracho-blanco+Prosopis torquata+Geoffroea decorticans* |  |  |  |  |  | 1 |  |  | 1 |
| 118 | *Aspidosperma quebracho-blanco+Prosopis torquata+Parkinsonia praecox* |  |  |  |  |  | 1 |  |  | 1 |
| 119 | *Aspidosperma quebracho-blanco+Prosopis torquata+Prosopis flexuosa* |  |  |  |  |  | 1 |  |  | 1 |
| 120 | *Aspidosperma quebracho-blanco+Prosopis torquata+Schinopsis lorentzii* |  |  |  |  |  | 1 |  |  | 1 |
| 121 | *Aspidosperma quebracho-blanco+Ruprechtia apetala+Sarcomphalus mistol* |  |  |  |  |  | 1 |  |  | 1 |
| 122 | *Aspidosperma quebracho-blanco+Salta triflora* |  |  |  |  |  | 8 |  |  | 8 |
| 123 | *Aspidosperma quebracho-blanco+Salta triflora+Bougainvillea praecox* |  |  |  |  |  | 1 |  |  | 1 |
| 124 | *Aspidosperma quebracho-blanco+Salta triflora+Castela coccinea* |  |  |  |  |  | 1 |  |  | 1 |
| 125 | *Aspidosperma quebracho-blanco+Salta triflora+Ceiba chodatii* |  |  |  |  |  | 1 |  |  | 1 |
| 126 | *Aspidosperma quebracho-blanco+Salta triflora+Libidibia paraguariensis* |  |  |  |  |  | 1 |  |  | 1 |
| 127 | *Aspidosperma quebracho-blanco+Salta triflora+Prosopis nigra+Schinopsis lorentzii* |  |  |  |  |  | 1 |  |  | 1 |
| 128 | *Aspidosperma quebracho-blanco+Salta triflora+Sarcomphalus mistol* |  |  |  |  |  | 4 |  |  | 4 |
| 129 | *Aspidosperma quebracho-blanco+Salta triflora+Sarcomphalus mistol+Schinopsis lorentzii* |  |  |  |  |  | 1 |  |  | 1 |
| 130 | *Aspidosperma quebracho-blanco+Salta triflora+Sarcomphalus mistol+Senegalia praecox* |  |  |  |  |  | 1 |  |  | 1 |
| 131 | *Aspidosperma quebracho-blanco+Salta triflora+Schinopsis lorentzii* |  |  |  |  |  | 5 |  |  | 5 |
| 132 | *Aspidosperma quebracho-blanco+Salta triflora+Schinopsis lorentzii+Libidibia paraguariensis* |  |  |  |  |  | 1 |  |  | 1 |
| 133 | *Aspidosperma quebracho-blanco+Salta triflora+Senegalia praecox* |  |  |  |  |  | 1 |  |  | 1 |
| 134 | *Aspidosperma quebracho-blanco+Salta triflora+Senegalia praecox+Sideroxylon obtusifolium* |  |  |  |  |  | 1 |  |  | 1 |
| 135 | *Aspidosperma quebracho-blanco+Salta triflora+Sideroxylon obtusifolium* |  |  |  |  |  | 1 |  |  | 1 |
| 136 | *Aspidosperma quebracho-blanco+Salta triflora+Tabebuia nodosa* |  |  |  |  |  | 2 |  |  | 2 |
| 137 | *Aspidosperma quebracho-blanco+Salta triflora+Tabebuia nodosa+Gonopterodendron sarmientoi* |  |  |  |  |  | 1 |  |  | 1 |
| 138 | *Aspidosperma quebracho-blanco+Salta triflora+Tabebuia nodosa+Sarcomphalus mistol* |  |  |  |  |  | 1 |  |  | 1 |
| 139 | *Aspidosperma quebracho-blanco+Salta triflora+Ximenia americana* |  |  |  |  |  | 1 |  |  | 1 |
| 140 | *Aspidosperma quebracho-blanco+Sarcomphalus mistol* |  |  |  |  |  | 42 |  |  | 42 |
| 141 | *Aspidosperma quebracho-blanco+Sarcomphalus mistol+Atamisquea emarginata+Senegalia praecox* |  |  |  |  |  | 1 |  |  | 1 |
| 142 | *Aspidosperma quebracho-blanco+Sarcomphalus mistol+Bougainvillea campanulata* |  |  |  |  |  | 1 |  |  | 1 |
| 143 | *Aspidosperma quebracho-blanco+Sarcomphalus mistol+Bougainvillea spinosa* |  |  |  |  |  | 1 |  |  | 1 |
| 144 | *Aspidosperma quebracho-blanco+Sarcomphalus mistol+Ceiba chodatii* |  |  |  |  |  | 1 |  |  | 1 |
| 145 | *Aspidosperma quebracho-blanco+Sarcomphalus mistol+Celtis ehrenbergiana* |  |  |  |  |  | 1 |  |  | 1 |
| 146 | *Aspidosperma quebracho-blanco+Sarcomphalus mistol+Gonopterodendron sarmientoi* |  |  |  |  |  | 1 |  |  | 1 |
| 147 | *Aspidosperma quebracho-blanco+Sarcomphalus mistol+Gonopterodendron sarmientoi+Salta triflora* |  |  |  |  |  | 1 |  |  | 1 |
| 148 | *Aspidosperma quebracho-blanco+Sarcomphalus mistol+Gonopterodendron sarmientoi+Tabebuia nodosa* |  |  |  |  |  | 1 |  |  | 1 |
| 149 | *Aspidosperma quebracho-blanco+Sarcomphalus mistol+Jodina rhombifolia* |  |  |  |  |  | 1 |  |  | 1 |
| 150 | *Aspidosperma quebracho-blanco+Sarcomphalus mistol+Mimozyganthus carinatus* |  |  |  |  |  | 1 |  |  | 1 |
| 151 | *Aspidosperma quebracho-blanco+Sarcomphalus mistol+Parkinsonia praecox* |  |  |  |  |  | 1 |  |  | 1 |
| 152 | *Aspidosperma quebracho-blanco+Sarcomphalus mistol+Prosopis kuntzei* |  |  |  |  |  | 3 |  |  | 3 |
| 153 | *Aspidosperma quebracho-blanco+Sarcomphalus mistol+Prosopis nigra* |  |  |  |  |  | 6 |  |  | 6 |
| 154 | *Aspidosperma quebracho-blanco+Sarcomphalus mistol+Prosopis nigra+Senegalia praecox* |  |  |  |  |  | 1 |  |  | 1 |
| 155 | *Aspidosperma quebracho-blanco+Sarcomphalus mistol+Salta triflora* |  |  |  |  |  | 2 |  |  | 2 |
| 156 | *Aspidosperma quebracho-blanco+Sarcomphalus mistol+Salta triflora+Aspidosperma triternatum* |  |  |  |  |  | 1 |  |  | 1 |
| 157 | *Aspidosperma quebracho-blanco+Sarcomphalus mistol+Salta triflora+Gonopterodendron sarmientoi* |  |  |  |  |  | 1 |  |  | 1 |
| 158 | *Aspidosperma quebracho-blanco+Sarcomphalus mistol+Salta triflora+Vachellia aroma* |  |  |  |  |  | 1 |  |  | 1 |
| 159 | *Aspidosperma quebracho-blanco+Sarcomphalus mistol+Sarcotoxicum salicifolium+Schinopsis lorentzii* |  |  |  |  |  | 1 |  |  | 1 |
| 160 | *Aspidosperma quebracho-blanco+Sarcomphalus mistol+Schinopsis lorentzii* |  |  |  |  |  | 13 |  |  | 13 |
| 161 | *Aspidosperma quebracho-blanco+Sarcomphalus mistol+Schinopsis lorentzii+Bougainvillea praecox* |  |  |  |  |  | 1 |  |  | 1 |
| 162 | *Aspidosperma quebracho-blanco+Sarcomphalus mistol+Schinopsis lorentzii+Libidibia paraguariensis* |  |  |  |  |  | 1 |  |  | 1 |
| 163 | *Aspidosperma quebracho-blanco+Sarcomphalus mistol+Schinopsis lorentzii+Prosopis alba* |  |  |  |  |  | 1 |  |  | 1 |
| 164 | *Aspidosperma quebracho-blanco+Sarcomphalus mistol+Schinopsis lorentzii+Salta triflora* |  |  |  |  |  | 1 |  |  | 1 |
| 165 | *Aspidosperma quebracho-blanco+Sarcomphalus mistol+Schinopsis lorentzii+Ximenia americana* |  |  |  |  |  | 1 |  |  | 1 |
| 166 | *Aspidosperma quebracho-blanco+Sarcomphalus mistol+Schinus longifolius* |  |  |  |  |  | 2 |  |  | 2 |
| 167 | *Aspidosperma quebracho-blanco+Sarcomphalus mistol+Senegalia praecox* |  |  |  |  |  | 1 |  |  | 1 |
| 168 | *Aspidosperma quebracho-blanco+Sarcomphalus mistol+Sideroxylon obtusifolium* |  |  |  |  |  | 3 |  |  | 3 |
| 169 | *Aspidosperma quebracho-blanco+Sarcomphalus mistol+Sideroxylon obtusifolium+Salta triflora* |  |  |  |  |  | 1 |  |  | 1 |
| 170 | *Aspidosperma quebracho-blanco+Sarcomphalus mistol+Tabebuia nodosa* |  |  |  |  |  | 1 |  |  | 1 |
| 171 | *Aspidosperma quebracho-blanco+Sarcomphalus mistol+Tabebuia nodosa+Gonopterodendron sarmientoi* |  |  |  |  |  | 1 |  |  | 1 |
| 172 | *Aspidosperma quebracho-blanco+Sarcomphalus mistol+Vachellia caven* |  |  |  |  |  | 1 |  |  | 1 |
| 173 | *Aspidosperma quebracho-blanco+Sarcomphalus mistol+Ximenia americana* |  |  |  |  |  | 2 |  |  | 2 |
| 174 | *Aspidosperma quebracho-blanco+Schinopsis balansae* |  |  |  |  |  | 1 |  |  | 1 |
| 175 | *Aspidosperma quebracho-blanco+Schinopsis balansae+Cordia americana* |  |  |  |  |  | 2 |  |  | 2 |
| 176 | *Aspidosperma quebracho-blanco+Schinopsis balansae+Libidibia paraguariensis+Cordia americana* |  |  |  |  |  | 1 |  |  | 1 |
| 177 | *Aspidosperma quebracho-blanco+Schinopsis balansae+Prosopis kuntzei+Achatocarpus praecox* |  |  |  |  |  | 1 |  |  | 1 |
| 178 | *Aspidosperma quebracho-blanco+Schinopsis lorentzii* |  |  |  |  |  | 35 |  |  | 35 |
| 179 | *Aspidosperma quebracho-blanco+Schinopsis lorentzii+Gonopterodendron sarmientoi* |  |  |  |  |  | 2 |  |  | 2 |
| 180 | *Aspidosperma quebracho-blanco+Schinopsis lorentzii+Jodina rhombifolia* |  |  |  |  |  | 1 |  |  | 1 |
| 181 | *Aspidosperma quebracho-blanco+Schinopsis lorentzii+Libidibia paraguariensis* |  |  |  |  |  | 5 |  |  | 5 |
| 182 | *Aspidosperma quebracho-blanco+Schinopsis lorentzii+Parkinsonia praecox* |  |  |  |  |  | 1 |  |  | 1 |
| 183 | *Aspidosperma quebracho-blanco+Schinopsis lorentzii+Prosopis alba* |  |  |  |  |  | 1 |  |  | 1 |
| 184 | *Aspidosperma quebracho-blanco+Schinopsis lorentzii+Prosopis elata* |  |  |  |  |  | 1 |  |  | 1 |
| 185 | *Aspidosperma quebracho-blanco+Schinopsis lorentzii+Prosopis nigra* |  |  |  |  |  | 1 |  |  | 1 |
| 186 | *Aspidosperma quebracho-blanco+Schinopsis lorentzii+Salta triflora* |  |  |  |  |  | 5 |  |  | 5 |
| 187 | *Aspidosperma quebracho-blanco+Schinopsis lorentzii+Salta triflora+Sarcomphalus mistol* |  |  |  |  |  | 3 |  |  | 3 |
| 188 | *Aspidosperma quebracho-blanco+Schinopsis lorentzii+Salta triflora+Tabebuia nodosa* |  |  |  |  |  | 1 |  |  | 1 |
| 189 | *Aspidosperma quebracho-blanco+Schinopsis lorentzii+Sarcomphalus mistol* |  |  |  |  |  | 10 |  |  | 10 |
| 190 | *Aspidosperma quebracho-blanco+Schinopsis lorentzii+Sarcomphalus mistol+Senegalia praecox* |  |  |  |  |  | 1 |  |  | 1 |
| 191 | *Aspidosperma quebracho-blanco+Schinopsis lorentzii+Senegalia praecox* |  |  |  |  |  | 4 |  |  | 4 |
| 192 | *Aspidosperma quebracho-blanco+Schinopsis lorentzii+Senegalia praecox+Sarcomphalus mistol* |  |  |  |  |  | 1 |  |  | 1 |
| 193 | *Aspidosperma quebracho-blanco+Schinopsis lorentzii+Sideroxylon obtusifolium* |  |  |  |  |  | 1 |  |  | 1 |
| 194 | *Aspidosperma quebracho-blanco+Schinopsis lorentzii+Sideroxylon obtusifolium+Sarcomphalus mistol* |  |  |  |  |  | 1 |  |  | 1 |
| 195 | *Aspidosperma quebracho-blanco+Schinopsis lorentzii+Tabebuia nodosa* |  |  |  |  |  | 2 |  |  | 2 |
| 196 | *Aspidosperma quebracho-blanco+Schinopsis lorentzii+Vachellia caven* |  |  |  |  |  | 1 |  |  | 1 |
| 197 | *Aspidosperma quebracho-blanco+Schinus longifolius* |  |  |  |  |  | 2 |  |  | 2 |
| 198 | *Aspidosperma quebracho-blanco+Schinus longifolius+Prosopis ruscifolia+Sarcomphalus mistol* |  |  |  |  |  | 1 |  |  | 1 |
| 199 | *Aspidosperma quebracho-blanco+Schinus longifolius+Sarcomphalus mistol* |  |  |  |  |  | 2 |  |  | 2 |
| 200 | *Aspidosperma quebracho-blanco+Senegalia gilliesii* |  |  |  |  |  | 3 |  |  | 3 |
| 201 | *Aspidosperma quebracho-blanco+Senegalia gilliesii+Prosopis nigra* |  |  |  |  |  | 1 |  |  | 1 |
| 202 | *Aspidosperma quebracho-blanco+Senegalia gilliesii+Prosopis torquata* |  |  |  |  |  | 2 |  |  | 2 |
| 203 | *Aspidosperma quebracho-blanco+Senegalia gilliesii+Schinopsis lorentzii* |  |  |  |  |  | 1 |  |  | 1 |
| 204 | *Aspidosperma quebracho-blanco+Senegalia praecox* |  |  |  |  |  | 8 |  |  | 8 |
| 205 | *Aspidosperma quebracho-blanco+Senegalia praecox+Achatocarpus praecox* |  |  |  |  |  | 1 |  |  | 1 |
| 206 | *Aspidosperma quebracho-blanco+Senegalia praecox+Gonopterodendron sarmientoi* |  |  |  |  |  | 1 |  |  | 1 |
| 207 | *Aspidosperma quebracho-blanco+Senegalia praecox+Sarcomphalus mistol* |  |  |  |  |  | 1 |  |  | 1 |
| 208 | *Aspidosperma quebracho-blanco+Senegalia praecox+Schinopsis balansae+Diplokeleba floribunda* |  |  |  |  |  | 1 |  |  | 1 |
| 209 | *Aspidosperma quebracho-blanco+Senegalia praecox+Vachellia aroma* |  |  |  |  |  | 1 |  |  | 1 |
| 210 | *Aspidosperma quebracho-blanco+Sideroxylon obtusifolium* |  |  |  |  |  | 1 |  |  | 1 |
| 211 | *Aspidosperma quebracho-blanco+Sideroxylon obtusifolium+Calycophyllum multiflorum+Salta triflora* |  |  |  |  |  | 1 |  |  | 1 |
| 212 | *Aspidosperma quebracho-blanco+Sideroxylon obtusifolium+Prosopis ruscifolia* |  |  |  |  |  | 1 |  |  | 1 |
| 213 | *Aspidosperma quebracho-blanco+Sideroxylon obtusifolium+Salta triflora* |  |  |  |  |  | 1 |  |  | 1 |
| 214 | *Aspidosperma quebracho-blanco+Tabebuia nodosa* |  |  |  |  |  | 4 |  |  | 4 |
| 215 | *Aspidosperma quebracho-blanco+Tabebuia nodosa+Bougainvillea praecox* |  |  |  |  |  | 1 |  |  | 1 |
| 216 | *Aspidosperma quebracho-blanco+Tabebuia nodosa+Ceiba chodatii* |  |  |  |  |  | 1 |  |  | 1 |
| 217 | *Aspidosperma quebracho-blanco+Tabebuia nodosa+Gonopterodendron sarmientoi* |  |  |  |  |  | 2 |  |  | 2 |
| 218 | *Aspidosperma quebracho-blanco+Tabebuia nodosa+Salta triflora* |  |  |  |  |  | 1 |  |  | 1 |
| 219 | *Aspidosperma quebracho-blanco+Tabebuia nodosa+Sarcomphalus mistol+Gonopterodendron sarmientoi* |  |  |  |  |  | 1 |  |  | 1 |
| 220 | *Aspidosperma quebracho-blanco+Tabebuia nodosa+Schinopsis lorentzii* |  |  |  |  |  | 3 |  |  | 3 |
| 221 | *Aspidosperma quebracho-blanco+Tabebuia nodosa+Schinopsis lorentzii+Sarcomphalus mistol* |  |  |  |  |  | 1 |  |  | 1 |
| 222 | *Aspidosperma quebracho-blanco+Tabebuia nodosa+Senegalia praecox* |  |  |  |  |  | 1 |  |  | 1 |
| 223 | *Aspidosperma quebracho-blanco+Trithrinax schizophylla var. biflabellata+Prosopis kuntzei+Schinopsis lorentzii* |  |  |  |  |  | 1 |  |  | 1 |
| 224 | *Aspidosperma quebracho-blanco+Trithrinax schizophylla var. biflabellata+Sideroxylon obtusifolium* |  |  |  |  |  | 1 |  |  | 1 |
| 225 | *Aspidosperma quebracho-blanco+Vachellia aroma* |  |  |  |  |  | 2 |  |  | 2 |
| 226 | *Aspidosperma quebracho-blanco+Vachellia astringens* |  |  |  |  |  | 1 |  |  | 1 |
| 227 | *Aspidosperma quebracho-blanco+Vachellia caven* |  |  |  |  |  | 3 |  |  | 3 |
| 228 | *Aspidosperma quebracho-blanco+Vachellia caven+Senegalia gilliesii+Sarcomphalus mistol* |  |  |  |  |  | 1 |  |  | 1 |
| 229 | *Atamisquea emarginata+Aspidosperma quebracho-blanco+Sarcomphalus mistol* |  |  |  |  |  | 1 |  |  | 1 |
| 230 | *Bougainvillea praecox+Aspidosperma quebracho-blanco+Acanthosyris spinescens* |  |  |  |  |  | 1 |  |  | 1 |
| 231 | *Bougainvillea stipitata+Aspidosperma quebracho-blanco* |  |  |  |  |  | 1 |  |  | 1 |
| 232 | *Bulnesia retama+Aspidosperma quebracho-blanco* |  |  |  |  |  | 1 |  |  | 1 |
| 233 | *Condalia microphylla* |  |  |  | 1 |  |  |  |  | 1 |
| 234 | *Maytenus boaria+Aspidosperma quebracho-blanco* |  |  |  |  |  | 1 |  |  | 1 |
| 235 | *Ramorinoa girolae* |  |  |  | 1 |  |  |  |  | 1 |
| 236 | *Sarcomphalus mistol+Aspidosperma quebracho-blanco* |  |  |  |  |  | 46 |  |  | 46 |
| 237 | *Schinus longifolius+Condalia microphylla* |  |  |  | 1 |  |  |  |  | 1 |
| 238 | *Trichilia catigua+Aspidosperma quebracho-blanco+Senegalia praecox* |  |  |  |  |  | 1 |  |  | 1 |
| ***Asteraceae + others*** | |  |  |  |  |  |  |  |  |  |
| 239 | *Terminalia triflora* |  |  |  |  |  | 1 |  | 1 | 2 |
| 240 | *Terminalia triflora+Myrcianthes pseudomato+Tabebuia aurea* |  |  |  |  |  |  |  | 1 | 1 |
| 241 | *Terminalia triflora+Syagrus romanzoffiana+Ruprechtia laxiflora* |  |  |  |  |  | 1 |  |  | 1 |
| ***Austrocedrus chilensis + others*** | |  |  |  |  |  |  |  |  |  |
| 242 | *Austrocedrus chilensis* | 3 |  |  |  |  |  |  |  | 3 |
| 243 | *Austrocedrus chilensis+Lomatia hirsuta* | 2 |  |  |  |  |  |  |  | 2 |
| 244 | *Austrocedrus chilensis+Maytenus boaria* | 1 |  |  |  |  |  |  |  | 1 |
| 245 | *Austrocedrus chilensis+Nothofagus antarctica* | 1 |  |  |  |  |  |  |  | 1 |
| ***Bastardiopsis densiflora + otra*** | |  |  |  |  |  |  |  |  |  |
| 246 | *Bastardiopsis densiflora* |  |  |  |  |  |  | 1 |  | 1 |
| 247 | *Bastardiopsis densiflora+Cabralea canjerana+Prunus brasiliensis* |  |  |  |  |  |  | 1 |  | 1 |
| 248 | *Bastardiopsis densiflora+Nectandra angustifolia+Ceiba chodatii* |  |  |  |  |  |  | 1 |  | 1 |
| 249 | *Bastardiopsis densiflora+Nectandra angustifolia+Myrocarpus frondosus* |  |  |  |  |  |  | 1 |  | 1 |
| 250 | *Bastardiopsis densiflora+Nectandra angustifolia+Prunus brasiliensis* |  |  |  |  |  |  | 1 |  | 1 |
| 251 | *Bastardiopsis densiflora+Phytolacca dioica+Ocotea lancifolia* |  |  |  |  |  |  | 1 |  | 1 |
| 252 | *Bastardiopsis densiflora+Ruprechtia laxiflora+Nectandra angustifolia* |  |  |  |  |  |  | 1 |  | 1 |
| 253 | *Ficus luschnathiana+Phytolacca dioica* |  |  |  |  |  |  | 1 |  | 1 |
| 254 | *Phytolacca dioica+Bastardiopsis densiflora* |  |  |  |  |  |  | 1 |  | 1 |
| 255 | *Phytolacca dioica+Bastardiopsis densiflora+Nectandra angustifolia* |  |  |  |  |  |  | 1 |  | 1 |
| ***Bignoniaceae + others*** | |  |  |  |  |  |  |  |  |  |
| 256 | *Jacaranda mimosifolia+Azara salicifolia* |  |  |  |  |  |  |  | 1 | 1 |
| ***Caesalpinoideae + others*** | |  |  |  |  |  |  |  |  |  |
| 257 | *Apuleia leiocarpa+Chrysophyllum gonocarpum+Pisonia zapallo* |  |  |  |  |  |  | 1 |  | 1 |
| 258 | *Apuleia leiocarpa+Chrysophyllum gonocarpum+Trichilia claussenii* |  |  |  |  |  |  | 1 |  | 1 |
| 259 | *Athyana weinmanniifolia+Libidibia paraguariensis+Gochnatia palosanto+Schinopsis lorentzii* |  |  |  |  |  | 1 |  |  | 1 |
| 260 | *Geoffroea decorticans* |  |  |  | 6 |  | 29 |  |  | 35 |
| 261 | *Geoffroea decorticans+Celtis chichape* |  |  |  |  |  | 1 |  |  | 1 |
| 262 | *Geoffroea decorticans+Celtis ehrenbergiana* |  |  |  |  |  | 2 |  |  | 2 |
| 263 | *Geoffroea decorticans+Copernicia alba+Prosopis nigra* |  |  |  |  |  | 1 |  |  | 1 |
| 264 | *Geoffroea decorticans+Gonopterodendron sarmientoi* |  |  |  |  |  | 1 |  |  | 1 |
| 265 | *Geoffroea decorticans+Libidibia paraguariensis+Schinopsis lorentzii* |  |  |  |  |  | 1 |  |  | 1 |
| 266 | *Geoffroea decorticans+Mimozyganthus carinatus+Achatocarpus praecox* |  |  |  |  |  | 1 |  |  | 1 |
| 267 | *Geoffroea decorticans+Parkinsonia praecox+Aspidosperma quebracho-blanco* |  |  |  |  |  | 1 |  |  | 1 |
| 268 | *Geoffroea decorticans+Prosopis alba* |  |  |  |  |  | 2 |  |  | 2 |
| 269 | *Geoffroea decorticans+Prosopis flexuosa* |  |  |  | 1 |  |  |  |  | 1 |
| 270 | *Geoffroea decorticans+Prosopis nigra* |  |  |  |  |  | 5 |  |  | 5 |
| 271 | *Geoffroea decorticans+Prosopis nigra+Prosopis alba* |  |  |  |  |  | 1 |  |  | 1 |
| 272 | *Geoffroea decorticans+Prosopis ruscifolia* |  |  |  |  |  | 3 |  |  | 3 |
| 273 | *Geoffroea decorticans+Prosopis torquata+Condalia microphylla* |  |  |  |  |  | 1 |  |  | 1 |
| 274 | *Geoffroea decorticans+Rauvolfia schuelii* |  |  |  |  |  | 1 |  |  | 1 |
| 275 | *Geoffroea decorticans+Sarcomphalus mistol* |  |  |  |  |  | 1 |  |  | 1 |
| 276 | *Geoffroea decorticans+Sarcomphalus mistol+Pterogyne nitens+Aspidosperma quebracho-blanco* |  |  |  |  |  | 1 |  |  | 1 |
| 277 | *Geoffroea decorticans+Schinopsis balansae+Senegalia praecox+Vachellia caven* |  |  |  |  |  | 1 |  |  | 1 |
| 278 | *Geoffroea decorticans+Senegalia praecox+Schinus fasciculatus+Sarcomphalus mistol* |  |  |  |  |  | 1 |  |  | 1 |
| 279 | *Geoffroea decorticans+Tabebuia nodosa* |  |  |  |  |  | 2 |  |  | 2 |
| 280 | *Geoffroea decorticans+Vachellia aroma* |  |  |  |  |  | 1 |  |  | 1 |
| 281 | *Geoffroea decorticans+Vachellia caven* |  |  |  |  |  | 1 |  |  | 1 |
| 282 | *Geoffroea decorticans+Vallesia glabra* |  |  |  |  |  | 1 |  |  | 1 |
| 283 | *Holocalyx balansae+Machaerium stipitatum+Muellera campestris* |  |  |  |  |  |  | 1 |  | 1 |
| 284 | *Holocalyx balansae+Nectandra angustifolia+Apuleia leiocarpa* |  |  |  |  |  |  | 1 |  | 1 |
| 285 | *Holocalyx balansae+Nectandra angustifolia+Ficus luschnathiana* |  |  |  |  |  |  | 1 |  | 1 |
| 286 | *Libidibia paraguariensis* |  |  |  |  |  | 2 |  | 2 | 4 |
| 287 | *Libidibia paraguariensis+Achatocarpus praecox+Nectandra angustifolia* |  |  |  |  |  | 1 |  |  | 1 |
| 288 | *Libidibia paraguariensis+Allophylus edulis+Parapiptadenia excelsa+Anadenanthera colubrina* |  |  |  |  |  | 1 |  |  | 1 |
| 289 | *Libidibia paraguariensis+Anadenanthera colubrina* |  |  |  |  |  |  |  | 1 | 1 |
| 290 | *Libidibia paraguariensis+Anadenanthera colubrina+Parapiptadenia excelsa* |  |  |  |  |  |  |  | 1 | 1 |
| 291 | *Libidibia paraguariensis+Aspidosperma quebracho-blanco* |  |  |  |  |  | 2 |  | 1 | 3 |
| 292 | *Libidibia paraguariensis+Aspidosperma quebracho-blanco+Sarcomphalus mistol+Prosopis alba* |  |  |  |  |  | 1 |  |  | 1 |
| 293 | *Libidibia paraguariensis+Aspidosperma quebracho-blanco+Schinopsis lorentzii* |  |  |  |  |  | 1 |  |  | 1 |
| 294 | *Libidibia paraguariensis+Aspidosperma quebracho-blanco+Schinopsis lorentzii+Salta triflora* |  |  |  |  |  | 1 |  |  | 1 |
| 295 | *Libidibia paraguariensis+Aspidosperma quebracho-blanco+Senegalia gilliesii* |  |  |  |  |  | 1 |  |  | 1 |
| 296 | *Libidibia paraguariensis+Calycophyllum multiflorum+Ceiba chodatii* |  |  |  |  |  | 1 |  |  | 1 |
| 297 | *Libidibia paraguariensis+Calycophyllum multiflorum+Salta triflora* |  |  |  |  |  | 1 |  |  | 1 |
| 298 | *Libidibia paraguariensis+Cordia americana+Schinopsis balansae* |  |  |  |  |  | 1 |  |  | 1 |
| 299 | *Libidibia paraguariensis+Gleditsia amorphoides* |  |  |  |  |  | 1 |  |  | 1 |
| 300 | *Libidibia paraguariensis+Gleditsia amorphoides+Myrcianthes pungens* |  |  |  |  |  | 1 |  |  | 1 |
| 301 | *Libidibia paraguariensis+Gleditsia amorphoides+Phyllostylon rhamnoides* |  |  |  |  |  | 1 |  |  | 1 |
| 302 | *Libidibia paraguariensis+Gleditsia amorphoides+Schinopsis balansae* |  |  |  |  |  | 1 |  |  | 1 |
| 303 | *Libidibia paraguariensis+Myracrodruon balansae+Cordia americana* |  |  |  |  |  | 1 |  |  | 1 |
| 304 | *Libidibia paraguariensis+Myracrodruon balansae+Prosopis nigra* |  |  |  |  |  | 1 |  |  | 1 |
| 305 | *Libidibia paraguariensis+Myracrodruon balansae+Schinopsis balansae* |  |  |  |  |  | 1 |  |  | 1 |
| 306 | *Libidibia paraguariensis+Parapiptadenia excelsa+Duranta serratifolia+Senegalia praecox* |  |  |  |  |  | 1 |  |  | 1 |
| 307 | *Libidibia paraguariensis+Parkinsonia praecox* |  |  |  |  |  | 1 |  |  | 1 |
| 308 | *Libidibia paraguariensis+Phyllostylon rhamnoides+Ruprechtia laxiflora+Schinopsis balansae* |  |  |  |  |  | 1 |  |  | 1 |
| 309 | *Libidibia paraguariensis+Phyllostylon rhamnoides+Sideroxylon obtusifolium+Salta triflora* |  |  |  |  |  | 1 |  |  | 1 |
| 310 | *Libidibia paraguariensis+Prosopis nigra+Calycophyllum multiflorum* |  |  |  |  |  | 1 |  |  | 1 |
| 311 | *Libidibia paraguariensis+Ruprechtia apetala* |  |  |  |  |  | 1 |  |  | 1 |
| 312 | *Libidibia paraguariensis+Ruprechtia apetala+Prosopis nigra* |  |  |  |  |  | 1 |  |  | 1 |
| 313 | *Libidibia paraguariensis+Ruprechtia apetala+Senegalia praecox+Schinopsis lorentzii* |  |  |  |  |  | 1 |  |  | 1 |
| 314 | *Libidibia paraguariensis+Ruprechtia laxiflora+Cordia americana* |  |  |  |  |  | 1 |  |  | 1 |
| 315 | *Libidibia paraguariensis+Ruprechtia laxiflora+Gleditsia amorphoides* |  |  |  |  |  | 1 |  |  | 1 |
| 316 | *Libidibia paraguariensis+Ruprechtia laxiflora+Phyllostylon rhamnoides* |  |  |  |  |  | 1 |  |  | 1 |
| 317 | *Libidibia paraguariensis+Ruprechtia laxiflora+Schinopsis lorentzii* |  |  |  |  |  | 1 |  |  | 1 |
| 318 | *Libidibia paraguariensis+Salta triflora* |  |  |  |  |  | 2 |  |  | 2 |
| 319 | *Libidibia paraguariensis+Salta triflora+Bougainvillea praecox* |  |  |  |  |  | 1 |  |  | 1 |
| 320 | *Libidibia paraguariensis+Salta triflora+Prosopis nigra+Tabebuia nodosa* |  |  |  |  |  | 1 |  |  | 1 |
| 321 | *Libidibia paraguariensis+Salta triflora+Schinopsis lorentzii+Calycophyllum multiflorum* |  |  |  |  |  | 1 |  |  | 1 |
| 322 | *Libidibia paraguariensis+Sarcomphalus mistol* |  |  |  |  |  |  |  | 1 | 1 |
| 323 | *Libidibia paraguariensis+Sarcomphalus mistol+Castela coccinea+Lithraea molleoides* |  |  |  |  |  | 1 |  |  | 1 |
| 324 | *Libidibia paraguariensis+Sarcomphalus mistol+Salta triflora* |  |  |  |  |  | 1 |  |  | 1 |
| 325 | *Libidibia paraguariensis+Sarcomphalus mistol+Schinopsis lorentzii* |  |  |  |  |  | 1 |  |  | 1 |
| 326 | *Libidibia paraguariensis+Schinopsis balansae+Cordia americana* |  |  |  |  |  | 1 |  |  | 1 |
| 327 | *Libidibia paraguariensis+Schinopsis balansae+Trithrinax schizophylla var. biflabellata* |  |  |  |  |  | 1 |  |  | 1 |
| 328 | *Libidibia paraguariensis+Schinopsis lorentzii* |  |  |  |  |  | 1 |  |  | 1 |
| 329 | *Libidibia paraguariensis+Schinopsis lorentzii+Schinus molle* |  |  |  |  |  | 1 |  |  | 1 |
| 330 | *Libidibia paraguariensis+Senegalia gilliesii+Aspidosperma quebracho-blanco* |  |  |  |  |  | 1 |  |  | 1 |
| 331 | *Libidibia paraguariensis+Senegalia praecox* |  |  |  |  |  | 1 |  |  | 1 |
| 332 | *Libidibia paraguariensis+Sideroxylon obtusifolium+Aspidosperma quebracho-blanco+Myracrodruon balansae* |  |  |  |  |  | 1 |  |  | 1 |
| 333 | *Libidibia paraguariensis+Sideroxylon obtusifolium+Prosopis nigra+Ruprechtia laxiflora* |  |  |  |  |  | 1 |  |  | 1 |
| 334 | *Libidibia paraguariensis+Tabebuia nodosa+Anisocapparis speciosa* |  |  |  |  |  | 1 |  |  | 1 |
| 335 | *Libidibia paraguariensis+Tabebuia nodosa+Salta triflora* |  |  |  |  |  | 1 |  |  | 1 |
| 336 | *Maytenus vitis-idaea+Libidibia paraguariensis* |  |  |  |  |  | 1 |  |  | 1 |
| 337 | *Parkinsonia praecox+Aspidosperma quebracho-blanco* |  |  |  |  |  | 8 |  |  | 8 |
| 338 | *Parkinsonia praecox+Aspidosperma quebracho-blanco+Prosopis nigra* |  |  |  |  |  | 1 |  |  | 1 |
| 339 | *Parkinsonia praecox+Aspidosperma quebracho-blanco+Sarcomphalus mistol* |  |  |  |  |  | 1 |  |  | 1 |
| 340 | *Parkinsonia praecox+Atamisquea emarginata* |  |  |  |  |  | 1 |  |  | 1 |
| 341 | *Parkinsonia praecox+Geoffroea decorticans+Aspidosperma quebracho-blanco* |  |  |  |  |  | 1 |  |  | 1 |
| 342 | *Parkinsonia praecox+Prosopis flexuosa* |  |  |  |  |  | 6 |  |  | 6 |
| 343 | *Parkinsonia praecox+Prosopis flexuosa+Aspidosperma quebracho-blanco* |  |  |  |  |  | 1 |  |  | 1 |
| 344 | *Parkinsonia praecox+Prosopis nigra* |  |  |  |  |  | 5 |  |  | 5 |
| 345 | *Parkinsonia praecox+Prosopis nigra+Aspidosperma quebracho-blanco+Schinopsis lorentzii* |  |  |  |  |  | 1 |  |  | 1 |
| 346 | *Parkinsonia praecox+Prosopis nigra+Aspidosperma quebracho-blanco+Senegalia praecox* |  |  |  |  |  | 1 |  |  | 1 |
| 347 | *Parkinsonia praecox+Prosopis nigra+Schinopsis lorentzii* |  |  |  |  |  | 1 |  |  | 1 |
| 348 | *Parkinsonia praecox+Prosopis nigra+Vachellia aroma* |  |  |  |  |  | 1 |  |  | 1 |
| 349 | *Parkinsonia praecox+Prosopis ruscifolia* |  |  |  |  |  | 1 |  |  | 1 |
| 350 | *Parkinsonia praecox+Prosopis torquata* |  |  |  |  |  | 1 |  |  | 1 |
| 351 | *Parkinsonia praecox+Salta triflora+Prosopis elata* |  |  |  |  |  | 1 |  |  | 1 |
| 352 | *Parkinsonia praecox+Sarcomphalus mistol+Schinopsis lorentzii+Libidibia paraguariensis* |  |  |  |  |  | 1 |  |  | 1 |
| 353 | *Parkinsonia praecox+Schinopsis lorentzii* |  |  |  |  |  | 2 |  |  | 2 |
| 354 | *Parkinsonia praecox+Tabebuia nodosa* |  |  |  |  |  | 1 |  |  | 1 |
| 355 | *Parkinsonia praecox+Vachellia astringens* |  |  |  |  |  | 1 |  |  | 1 |
| 356 | *Peltophorum dubium+Enterolobium contortisiliquum+Gleditsia amorphoides+Terminalia triflora* |  |  |  |  |  | 1 |  |  | 1 |
| 357 | *Peltophorum dubium+Euterpe edulis* |  |  |  |  |  |  | 1 |  | 1 |
| 358 | *Pterogyne nitens+Maclura tinctoria* |  |  |  |  |  |  |  | 1 | 1 |
| 359 | *Pterogyne nitens+Salta triflora+Phyllostylon rhamnoides* |  |  |  |  |  | 1 |  |  | 1 |
| 360 | *Pterogyne nitens+Sarcomphalus mistol+Parkinsonia praecox* |  |  |  |  |  | 1 |  |  | 1 |
| 361 | *Pterogyne nitens+Vachellia caven+Albizia inundata+Gleditsia amorphoides* |  |  |  |  |  | 1 |  |  | 1 |
| 362 | *Schinus marchandii+Libidibia paraguariensis* |  |  |  |  |  | 1 |  |  | 1 |
| ***Calycophyllum multiflorum + others*** | |  |  |  |  |  |  |  |  |  |
| 363 | *Calycophyllum multiflorum+Anadenanthera colubrina+Ceiba chodatii* |  |  |  |  |  |  |  | 1 | 1 |
| 364 | *Calycophyllum multiflorum+Aspidosperma quebracho-blanco* |  |  |  |  |  | 1 |  |  | 1 |
| 365 | *Calycophyllum multiflorum+Cordia americana+Eugenia uniflora* |  |  |  |  |  | 1 |  |  | 1 |
| 366 | *Calycophyllum multiflorum+Gonopterodendron sarmientoi+Phyllostylon rhamnoides+Aspidosperma quebracho-blanco* |  |  |  |  |  | 1 |  |  | 1 |
| 367 | *Calycophyllum multiflorum+Libidibia paraguariensis+Aspidosperma quebracho-blanco+Phyllostylon rhamnoides* |  |  |  |  |  | 1 |  |  | 1 |
| 368 | *Calycophyllum multiflorum+Libidibia paraguariensis+Salta triflora* |  |  |  |  |  | 1 |  |  | 1 |
| 369 | *Calycophyllum multiflorum+Phyllostylon rhamnoides+Libidibia paraguariensis* |  |  |  |  |  |  |  | 1 | 1 |
| 370 | *Calycophyllum multiflorum+Prosopis alba+Prosopis ruscifolia* |  |  |  |  |  | 1 |  |  | 1 |
| 371 | *Calycophyllum multiflorum+Salta triflora* |  |  |  |  |  | 1 |  |  | 1 |
| 372 | *Calycophyllum multiflorum+Salta triflora+Anadenanthera colubrina* |  |  |  |  |  |  |  | 1 | 1 |
| 373 | *Calycophyllum multiflorum+Schinopsis lorentzii* |  |  |  |  |  | 1 |  |  | 1 |
| 374 | *Calycophyllum multiflorum+Sideroxylon obtusifolium+Aspidosperma quebracho-blanco* |  |  |  |  |  | 1 |  |  | 1 |
| 375 | *Calycophyllum multiflorum+Terminalia triflora+Ceiba chodatii* |  |  |  |  |  |  |  | 1 | 1 |
| 376 | *Cordia trichotoma+Parapiptadenia excelsa+Aspidosperma quebracho-blanco* |  |  |  |  |  |  |  | 1 | 1 |
| 377 | *Erythrina crista-galli+Allophylus edulis* |  |  |  |  |  |  |  | 1 | 1 |
| 378 | *Lonchocarpus lilloi+Parasenegalia visco+Tipuana tipu* |  |  |  |  |  |  |  | 1 | 1 |
| 379 | *Tipuana tipu* |  |  |  |  |  |  |  | 3 | 3 |
| 380 | *Tipuana tipu+Blepharocalyx salicifolius+Scutia buxifolia+Anadenanthera colubrina* |  |  |  |  |  |  |  | 1 | 1 |
| ***Capparaceae + others*** | |  |  |  |  |  |  |  |  |  |
| 381 | *Anisocapparis speciosa+Salta triflora+Aspidosperma quebracho-blanco+Tabebuia nodosa* |  |  |  |  |  | 1 |  |  | 1 |
| 382 | *Capparicordis tweediana* |  |  |  |  |  | 1 |  |  | 1 |
| 383 | *Cynophalla retusa+Acanthosyris falcata+Gonopterodendron sarmientoi* |  |  |  |  |  | 1 |  |  | 1 |
| 384 | *Cynophalla retusa+Cordia americana* |  |  |  |  |  | 1 |  |  | 1 |
| ***Caricaceae + others*** | |  |  |  |  |  |  |  |  |  |
| 385 | *Jacaratia spinosa+Cabralea canjerana+Holocalyx balansae* |  |  |  |  |  |  | 1 |  | 1 |
| 386 | *Jacaratia spinosa+Chrysophyllum gonocarpum+Cordia trichotoma+Syagrus romanzoffiana* |  |  |  |  |  |  | 1 |  | 1 |
| ***Ceiba + others*** | |  |  |  |  |  |  |  |  |  |
| 387 | *Aspidosperma quebracho-blanco+Ceiba chodatii* |  |  |  |  |  | 2 |  |  | 2 |
| 388 | *Aspidosperma quebracho-blanco+Ceiba chodatii+Schinopsis lorentzii* |  |  |  |  |  | 1 |  |  | 1 |
| 389 | *Ceiba chodatii* |  |  |  |  |  | 14 |  | 1 | 15 |
| 390 | *Ceiba chodatii+Achatocarpus praecox+Prosopis alba+Anisocapparis speciosa* |  |  |  |  |  | 1 |  |  | 1 |
| 391 | *Ceiba chodatii+Anadenanthera colubrina* |  |  |  |  |  | 3 |  |  | 3 |
| 392 | *Ceiba chodatii+Anadenanthera colubrina+Agonandra excelsa+Pterogyne nitens* |  |  |  |  |  |  |  | 1 | 1 |
| 393 | *Ceiba chodatii+Anadenanthera colubrina+Salta triflora* |  |  |  |  |  | 1 |  |  | 1 |
| 394 | *Ceiba chodatii+Anadenanthera colubrina+Schinopsis lorentzii* |  |  |  |  |  | 1 |  |  | 1 |
| 395 | *Ceiba chodatii+Aspidosperma quebracho-blanco* |  |  |  |  |  | 5 |  |  | 5 |
| 396 | *Ceiba chodatii+Aspidosperma quebracho-blanco+Gonopterodendron sarmientoi+Tabebuia nodosa* |  |  |  |  |  | 1 |  |  | 1 |
| 397 | *Ceiba chodatii+Aspidosperma quebracho-blanco+Salta triflora* |  |  |  |  |  | 2 |  |  | 2 |
| 398 | *Ceiba chodatii+Aspidosperma quebracho-blanco+Sarcomphalus mistol* |  |  |  |  |  | 1 |  |  | 1 |
| 399 | *Ceiba chodatii+Aspidosperma quebracho-blanco+Sarcomphalus mistol+Tabebuia nodosa* |  |  |  |  |  | 1 |  |  | 1 |
| 400 | *Ceiba chodatii+Aspidosperma quebracho-blanco+Schinopsis lorentzii* |  |  |  |  |  | 2 |  |  | 2 |
| 401 | *Ceiba chodatii+Aspidosperma quebracho-blanco+Schinopsis lorentzii+Tabebuia nodosa* |  |  |  |  |  | 1 |  |  | 1 |
| 402 | *Ceiba chodatii+Aspidosperma quebracho-blanco+Ximenia americana* |  |  |  |  |  | 1 |  |  | 1 |
| 403 | *Ceiba chodatii+Calycophyllum multiflorum+Salta triflora* |  |  |  |  |  | 1 |  |  | 1 |
| 404 | *Ceiba chodatii+Gleditsia amorphoides+Jacaranda mimosifolia+Anadenanthera colubrina* |  |  |  |  |  |  |  | 1 | 1 |
| 405 | *Ceiba chodatii+Gonopterodendron sarmientoi* |  |  |  |  |  | 1 |  |  | 1 |
| 406 | *Ceiba chodatii+Gonopterodendron sarmientoi+Aspidosperma quebracho-blanco* |  |  |  |  |  | 1 |  |  | 1 |
| 407 | *Ceiba chodatii+Gonopterodendron sarmientoi+Salta triflora* |  |  |  |  |  | 1 |  |  | 1 |
| 408 | *Ceiba chodatii+Gonopterodendron sarmientoi+Salta triflora+Sarcomphalus mistol* |  |  |  |  |  | 1 |  |  | 1 |
| 409 | *Ceiba chodatii+Handroanthus impetiginosus+Senegalia praecox* |  |  |  |  |  | 1 |  |  | 1 |
| 410 | *Ceiba chodatii+Libidibia paraguariensis+Aspidosperma quebracho-blanco* |  |  |  |  |  | 1 |  |  | 1 |
| 411 | *Ceiba chodatii+Mimozyganthus carinatus* |  |  |  |  |  | 1 |  |  | 1 |
| 412 | *Ceiba chodatii+Muellera campestris+Balfourodendron riedelianum* |  |  |  |  |  |  | 1 |  | 1 |
| 413 | *Ceiba chodatii+Pisonia zapallo* |  |  |  |  |  |  | 1 |  | 1 |
| 414 | *Ceiba chodatii+Prosopis alba+Salta triflora+Sarcomphalus mistol* |  |  |  |  |  | 1 |  |  | 1 |
| 415 | *Ceiba chodatii+Salta triflora* |  |  |  |  |  | 6 |  |  | 6 |
| 416 | *Ceiba chodatii+Salta triflora+Gonopterodendron sarmientoi* |  |  |  |  |  | 1 |  |  | 1 |
| 417 | *Ceiba chodatii+Salta triflora+Prosopis vinalillo* |  |  |  |  |  | 1 |  |  | 1 |
| 418 | *Ceiba chodatii+Salta triflora+Schinopsis lorentzii* |  |  |  |  |  | 1 |  |  | 1 |
| 419 | *Ceiba chodatii+Sarcomphalus mistol* |  |  |  |  |  | 1 |  |  | 1 |
| 420 | *Ceiba chodatii+Sarcomphalus mistol+Aspidosperma quebracho-blanco* |  |  |  |  |  | 1 |  |  | 1 |
| 421 | *Ceiba chodatii+Sarcomphalus mistol+Salta triflora* |  |  |  |  |  | 1 |  |  | 1 |
| 422 | *Ceiba chodatii+Sarcomphalus mistol+Schinopsis lorentzii* |  |  |  |  |  | 2 |  |  | 2 |
| 423 | *Ceiba chodatii+Sarcomphalus mistol+Schinopsis lorentzii+Ruprechtia apetala* |  |  |  |  |  | 1 |  |  | 1 |
| 424 | *Ceiba chodatii+Schinopsis lorentzii* |  |  |  |  |  | 7 |  | 1 | 8 |
| 425 | *Ceiba chodatii+Schinopsis lorentzii+Bougainvillea praecox* |  |  |  |  |  | 1 |  |  | 1 |
| 426 | *Ceiba chodatii+Schinopsis lorentzii+Libidibia paraguariensis* |  |  |  |  |  | 1 |  |  | 1 |
| 427 | *Ceiba chodatii+Schinopsis lorentzii+Salta triflora* |  |  |  |  |  | 1 |  |  | 1 |
| 428 | *Ceiba chodatii+Tabebuia nodosa+Salta triflora+Gonopterodendron sarmientoi* |  |  |  |  |  | 1 |  |  | 1 |
| 429 | *Ceiba chodatii+Tabebuia nodosa+Schinopsis lorentzii* |  |  |  |  |  | 1 |  |  | 1 |
| 430 | *Gonopterodendron sarmientoi+Ceiba chodatii+Aspidosperma quebracho-blanco+Sarcomphalus mistol* |  |  |  |  |  | 1 |  |  | 1 |
| 431 | *Prosopis alba* |  |  |  |  |  |  |  | 1 | 1 |
| 432 | *Prosopis kuntzei+Ceiba chodatii+Salta triflora+Sideroxylon obtusifolium* |  |  |  |  |  | 1 |  |  | 1 |
| 433 | *Salta triflora+Ceiba chodatii+Gonopterodendron sarmientoi* |  |  |  |  |  | 1 |  |  | 1 |
| 434 | *Sarcomphalus mistol+Ceiba chodatii* |  |  |  |  |  | 2 |  |  | 2 |
| 435 | *Sarcomphalus mistol+Ceiba chodatii+Aspidosperma quebracho-blanco+Libidibia paraguariensis* |  |  |  |  |  | 1 |  |  | 1 |
| 436 | *Sarcomphalus mistol+Ceiba chodatii+Senegalia gilliesii+Aspidosperma quebracho-blanco* |  |  |  |  |  | 1 |  |  | 1 |
| 437 | *Sarcotoxicum salicifolium+Ceiba chodatii+Gonopterodendron sarmientoi* |  |  |  |  |  | 1 |  |  | 1 |
| 438 | *Schinopsis lorentzii* |  |  |  |  |  | 1 |  |  | 1 |
| 439 | *Schinopsis lorentzii+Ceiba chodatii+Libidibia paraguariensis+Salta triflora* |  |  |  |  |  | 1 |  |  | 1 |
| 440 | *Sideroxylon obtusifolium+Ceiba chodatii+Pisonia zapallo* |  |  |  |  |  | 1 |  |  | 1 |
| 441 | *Trithrinax schizophylla var. biflabellata+Ceiba chodatii+Schinopsis lorentzii* |  |  |  |  |  | 1 |  |  | 1 |
| ***Celtis + others*** | |  |  |  |  |  |  |  |  |  |
| 442 | *Celtis ehrenbergiana* |  |  | 2 |  |  | 4 |  |  | 6 |
| 443 | *Celtis ehrenbergiana+Anadenanthera colubrina* |  |  |  |  |  | 1 |  |  | 1 |
| 444 | *Celtis ehrenbergiana+Geoffroea decorticans* |  |  |  |  |  | 1 |  |  | 1 |
| 445 | *Celtis ehrenbergiana+Mimozyganthus carinatus* |  |  |  |  |  | 1 |  |  | 1 |
| 446 | *Celtis ehrenbergiana+Parasenegalia visco+Lithraea molleoides* |  |  |  |  |  | 1 |  |  | 1 |
| 447 | *Celtis ehrenbergiana+Prosopis affinis* |  |  | 1 |  |  | 1 |  |  | 2 |
| 448 | *Celtis ehrenbergiana+Prosopis alba* |  |  |  |  |  | 2 |  |  | 2 |
| 449 | *Celtis ehrenbergiana+Prosopis nigra* |  |  | 1 |  |  | 4 |  |  | 5 |
| 450 | *Celtis ehrenbergiana+Ruprechtia laxiflora+Berberis laurina* |  |  | 1 |  |  |  |  |  | 1 |
| 451 | *Celtis ehrenbergiana+Sarcomphalus mistol* |  |  |  |  |  | 1 |  |  | 1 |
| 452 | *Celtis ehrenbergiana+Schinus fasciculatus* |  |  |  |  |  | 1 |  |  | 1 |
| 453 | *Celtis ehrenbergiana+Schinus longifolius* |  |  | 1 |  |  |  |  |  | 1 |
| 454 | *Celtis ehrenbergiana+Senegalia praecox+Ruprechtia apetala+Ruprechtia laxiflora* |  |  |  |  |  | 1 |  |  | 1 |
| 455 | *Celtis ehrenbergiana+Sideroxylon obtusifolium+Sarcomphalus mistol* |  |  |  |  |  | 1 |  |  | 1 |
| 456 | *Celtis ehrenbergiana+Terminalia australis* |  |  | 1 |  |  |  |  |  | 1 |
| 457 | *Celtis ehrenbergiana+Vachellia aroma* |  |  |  |  |  | 3 |  |  | 3 |
| 458 | *Celtis ehrenbergiana+Vachellia aroma+Bougainvillea stipitata* |  |  |  |  |  | 1 |  |  | 1 |
| 459 | *Celtis ehrenbergiana+Vachellia caven* |  |  | 1 |  |  |  |  |  | 1 |
| 460 | *Celtis pallida* |  |  |  |  |  | 1 |  |  | 1 |
| ***Cervantesiaceae + others*** | |  |  |  |  |  |  |  |  |  |
| 461 | *Acanthosyris falcata* |  |  |  |  |  | 2 |  |  | 2 |
| 462 | *Acanthosyris falcata+Aspidosperma quebracho-blanco+Libidibia paraguariensis* |  |  |  |  |  | 1 |  |  | 1 |
| 463 | *Acanthosyris falcata+Copernicia alba* |  |  |  |  |  | 1 |  |  | 1 |
| 464 | *Acanthosyris falcata+Cordia americana+Aspidosperma quebracho-blanco* |  |  |  |  |  | 1 |  |  | 1 |
| 465 | *Acanthosyris falcata+Prosopis kuntzei+Senegalia praecox+Zanthoxylum petiolare* |  |  |  |  |  | 1 |  |  | 1 |
| 466 | *Acanthosyris falcata+Senegalia praecox+Aspidosperma quebracho-blanco+Ceiba chodatii* |  |  |  |  |  | 1 |  |  | 1 |
| 467 | *Acanthosyris falcata+Tabebuia nodosa+Aspidosperma quebracho-blanco* |  |  |  |  |  | 1 |  |  | 1 |
| ***Cordia + others*** | |  |  |  |  |  |  |  |  |  |
| 468 | *Coccoloba tiliacea+Cordia americana+Diatenopteryx sorbifolia* |  |  |  |  |  |  |  | 1 | 1 |
| 469 | *Cordia americana* |  |  |  |  |  |  | 1 |  | 1 |
| 470 | *Cordia americana+Acanthosyris falcata+Aspidosperma quebracho-blanco+Senegalia praecox* |  |  |  |  |  | 1 |  |  | 1 |
| 471 | *Cordia americana+Acanthosyris falcata+Libidibia paraguariensis* |  |  |  |  |  | 1 |  |  | 1 |
| 472 | *Cordia americana+Allophylus edulis+Luehea divaricata* |  |  |  |  |  |  | 1 |  | 1 |
| 473 | *Cordia americana+Anadenanthera colubrina* |  |  |  |  |  |  |  | 2 | 2 |
| 474 | *Cordia americana+Diatenopteryx sorbifolia+Muellera campestris+Nectandra angustifolia* |  |  |  |  |  |  | 1 |  | 1 |
| 475 | *Cordia americana+Enterolobium contortisiliquum+Aspidosperma australe* |  |  |  |  |  |  | 1 |  | 1 |
| 476 | *Cordia americana+Eugenia uniflora* |  |  |  |  |  | 1 |  |  | 1 |
| 477 | *Cordia americana+Eugenia uniflora+Helietta apiculata+Handroanthus heptaphyllus* |  |  |  |  |  |  | 1 |  | 1 |
| 478 | *Cordia americana+Eugenia uniflora+Myracrodruon balansae* |  |  |  |  |  | 1 |  |  | 1 |
| 479 | *Cordia americana+Ficus luschnathiana+Aspidosperma australe* |  |  |  |  |  |  | 1 |  | 1 |
| 480 | *Cordia americana+Gleditsia amorphoides* |  |  |  |  |  | 1 |  |  | 1 |
| 481 | *Cordia americana+Gleditsia amorphoides+Diplokeleba floribunda* |  |  |  |  |  | 1 |  |  | 1 |
| 482 | *Cordia americana+Gleditsia amorphoides+Enterolobium contortisiliquum+Handroanthus heptaphyllus* |  |  |  |  |  | 1 |  |  | 1 |
| 483 | *Cordia americana+Gleditsia amorphoides+Erythrina crista-galli+Vachellia aroma* |  |  |  |  |  | 1 |  |  | 1 |
| 484 | *Cordia americana+Gleditsia amorphoides+Schinopsis balansae* |  |  |  |  |  | 1 |  |  | 1 |
| 485 | *Cordia americana+Handroanthus heptaphyllus+Diplokeleba floribunda* |  |  |  |  |  | 1 |  |  | 1 |
| 486 | *Cordia americana+Libidibia paraguariensis+Pisonia zapallo* |  |  |  |  |  | 1 |  |  | 1 |
| 487 | *Cordia americana+Libidibia paraguariensis+Pisonia zapallo+Gleditsia amorphoides* |  |  |  |  |  | 1 |  |  | 1 |
| 488 | *Cordia americana+Luehea divaricata* |  |  |  |  |  |  | 1 |  | 1 |
| 489 | *Cordia americana+Luehea divaricata+Nectandra angustifolia* |  |  |  |  |  |  | 1 |  | 1 |
| 490 | *Cordia americana+Matayba elaeagnoides+Handroanthus albus* |  |  |  |  |  |  | 1 |  | 1 |
| 491 | *Cordia americana+Myrcianthes mato+Cupania vernalis* |  |  |  |  |  |  |  | 1 | 1 |
| 492 | *Cordia americana+Myrcianthes pungens+Ocotea puberula* |  |  |  |  |  |  |  | 1 | 1 |
| 493 | *Cordia americana+Myrcianthes pungens+Ruprechtia apetala+Diatenopteryx sorbifolia* |  |  |  |  |  |  |  | 1 | 1 |
| 494 | *Cordia americana+Nectandra angustifolia+Balfourodendron riedelianum+Parapiptadenia rigida* |  |  |  |  |  |  | 1 |  | 1 |
| 495 | *Cordia americana+Nectandra angustifolia+Chrysophyllum gonocarpum* |  |  |  |  |  |  | 1 |  | 1 |
| 496 | *Cordia americana+Nectandra angustifolia+Cupania vernalis* |  |  |  |  |  |  | 1 |  | 1 |
| 497 | *Cordia americana+Parapiptadenia rigida+Allophylus edulis* |  |  |  |  |  |  | 1 |  | 1 |
| 498 | *Cordia americana+Phyllostylon rhamnoides* |  |  |  |  |  | 1 |  |  | 1 |
| 499 | *Cordia americana+Phyllostylon rhamnoides+Sideroxylon obtusifolium* |  |  |  |  |  | 1 |  |  | 1 |
| 500 | *Cordia americana+Phytolacca dioica* |  |  |  |  |  |  | 1 |  | 1 |
| 501 | *Cordia americana+Pisonia zapallo+Gleditsia amorphoides+Phyllostylon rhamnoides* |  |  |  |  |  | 1 |  |  | 1 |
| 502 | *Cordia americana+Prunus brasiliensis* |  |  |  |  |  |  | 1 |  | 1 |
| 503 | *Cordia americana+Ruprechtia apetala+Aspidosperma triternatum+Senegalia praecox* |  |  |  |  |  | 1 |  |  | 1 |
| 504 | *Cordia americana+Ruprechtia laxiflora+Enterolobium contortisiliquum+Syagrus romanzoffiana* |  |  |  |  |  | 1 |  |  | 1 |
| 505 | *Cordia americana+Schinopsis balansae* |  |  |  |  |  | 1 |  |  | 1 |
| 506 | *Cordia americana+Schinopsis balansae+Aspidosperma quebracho-blanco* |  |  |  |  |  | 1 |  |  | 1 |
| 507 | *Cordia americana+Schinopsis balansae+Gleditsia amorphoides* |  |  |  |  |  | 1 |  |  | 1 |
| 508 | *Cordia americana+Schinopsis balansae+Prosopis nigra* |  |  |  |  |  | 1 |  |  | 1 |
| 509 | *Cordia americana+Senegalia praecox+Libidibia paraguariensis* |  |  |  |  |  | 1 |  |  | 1 |
| 510 | *Cordia americana+Senegalia praecox+Schinus longifolius* |  |  |  |  |  | 1 |  |  | 1 |
| 511 | *Cordia americana+Senegalia praecox+Sideroxylon obtusifolium* |  |  |  |  |  | 1 |  |  | 1 |
| 512 | *Cordia americana+Senegalia praecox+Trichilia catigua+Aspidosperma quebracho-blanco* |  |  |  |  |  | 1 |  |  | 1 |
| 513 | *Cordia americana+Trema micrantha* |  |  |  |  |  |  |  | 1 | 1 |
| 514 | *Cordia americana+Trichilia catigua+Libidibia paraguariensis* |  |  |  |  |  | 1 |  |  | 1 |
| 515 | *Cordia trichotoma+Cordia americana+Ceiba chodatii+Cenostigma pluviosum* |  |  |  |  |  |  |  | 1 | 1 |
| 516 | *Cordia trichotoma+Parapiptadenia excelsa+Cedrela balansae* |  |  |  |  |  |  |  | 1 | 1 |
| 517 | *Phytolacca dioica+Cordia americana+Helietta apiculata* |  |  |  |  |  |  | 1 |  | 1 |
| 518 | *Zanthoxylum rhoifolium+Pilocarpus pennatifolius+Cordia americana* |  |  |  |  |  |  | 1 |  | 1 |
| ***Elaeocarpaceae + others*** | |  |  |  |  |  |  |  |  |  |
| 519 | *Crinodendron tucumanum* |  |  |  |  |  |  |  | 1 | 1 |
| ***Euphorbiaceae + others*** | |  |  |  |  |  |  |  |  |  |
| 520 | *Alchornea triplinervia+Didymopanax morototoni+Pisonia zapallo* |  |  |  |  |  |  | 1 |  | 1 |
| 521 | *Croton piluliferus+Handroanthus lapacho+Ocotea puberula* |  |  |  |  |  |  |  | 1 | 1 |
| 522 | *Croton piluliferus+Ocotea puberula* |  |  |  |  |  |  |  | 1 | 1 |
| 523 | *Croton urucurana* |  | 1 |  |  |  |  |  |  | 1 |
| 524 | *Croton urucurana+Inga uraguensis* |  | 1 |  |  |  |  |  |  | 1 |
| 525 | *Erythrina crista-galli+Sapium haematospermum* |  |  |  |  |  | 1 |  |  | 1 |
| 526 | *Inga uraguensis+Sapium haematospermum* |  | 1 |  |  |  |  |  |  | 1 |
| 527 | *Sapium glandulosum* |  |  |  |  |  | 1 |  |  | 1 |
| 528 | *Sapium glandulosum+Celtis chichape* |  |  |  |  |  | 1 |  |  | 1 |
| 529 | *Sapium haematospermum* |  | 1 |  |  |  | 1 |  |  | 2 |
| 530 | *Sapium haematospermum+Bougainvillea stipitata+Albizia inundata* |  |  |  |  |  | 1 |  |  | 1 |
| 531 | *Sapium haematospermum+Copernicia alba* |  |  |  |  |  | 1 |  |  | 1 |
| 532 | *Sapium haematospermum+Enterolobium contortisiliquum+Prosopis affinis* |  |  |  |  |  | 1 |  |  | 1 |
| 533 | *Sapium haematospermum+Myrcianthes pungens+Gleditsia amorphoides+Ruprechtia laxiflora* |  |  |  |  |  | 1 |  |  | 1 |
| 534 | *Sapium haematospermum+Salix humboldtiana* |  |  |  |  |  |  |  | 1 | 1 |
| 535 | *Sapium haematospermum+Tabebuia nodosa* |  |  |  |  |  | 1 |  |  | 1 |
| 536 | *Sapium haematospermum+Vachellia caven* |  |  |  |  |  | 2 |  |  | 2 |
| 537 | *Sapium haematospermum+Vachellia caven+Chrysophyllum marginatum* |  |  |  |  |  | 1 |  |  | 1 |
| 538 | *Sapium haematospermum+Zanthoxylum coco* |  |  |  |  |  |  |  | 1 | 1 |
| 539 | *Schinus meyeri+Zanthoxylum coco* |  |  |  |  |  |  |  | 1 | 1 |
| 540 | *Scutia buxifolia+Chrysophyllum marginatum+Celtis iguanaea* |  |  | 1 |  |  |  |  |  | 1 |
| 541 | *Scutia buxifolia+Gleditsia amorphoides+Zanthoxylum fagara* |  |  | 1 |  |  |  |  |  | 1 |
| 542 | *Scutia buxifolia+Myrcianthes cisplatensis+Geoffroea decorticans* |  |  | 1 |  |  |  |  |  | 1 |
| 543 | *Sebastiania brasiliensis+Celtis ehrenbergiana* |  | 1 |  |  |  |  |  |  | 1 |
| 544 | *Sebastiania brasiliensis+Gleditsia amorphoides+Scutia buxifolia* |  |  |  |  |  | 2 |  |  | 2 |
| 545 | *Sebastiania brasiliensis+Salix humboldtiana* |  |  |  |  |  | 1 |  |  | 1 |
| 546 | *Sebastiania brasiliensis+Sebastiania commersoniana* |  |  | 1 |  |  |  |  |  | 1 |
| 547 | *Sebastiania brasiliensis+Vachellia aroma* |  |  |  |  |  | 1 |  |  | 1 |
| 548 | *Sebastiania brasiliensis+Vachellia caven* |  |  | 1 |  |  |  |  |  | 1 |
| 549 | *Sebastiania commersoniana+Myrcianthes cisplatensis* |  |  | 1 |  |  |  |  |  | 1 |
| 550 | *Sebastiania commersoniana+Myrcianthes cisplatensis+Scutia buxifolia* |  |  | 1 |  |  |  |  |  | 1 |
| 551 | *Sebastiania commersoniana+Phyllostylon rhamnoides+Terminalia triflora* |  |  |  |  |  | 1 |  |  | 1 |
| 552 | *Sideroxylon obtusifolium+Achatocarpus praecox+Scutia buxifolia+Ruprechtia laxiflora* |  |  | 1 |  |  |  |  |  | 1 |
| 553 | *Tetrorchidium rubrivenium+Didymopanax morototoni+Nectandra angustifolia* |  |  |  |  |  |  | 1 |  | 1 |
| ***Gonopterodendron sarmientoi + others*** | |  |  |  |  |  |  |  |  |  |
| 554 | *Aspidosperma triternatum+Gonopterodendron sarmientoi* |  |  |  |  |  | 1 |  |  | 1 |
| 555 | *Aspidosperma triternatum+Gonopterodendron sarmientoi+Tabebuia nodosa* |  |  |  |  |  | 1 |  |  | 1 |
| 556 | *Gonopterodendron bonariensis+Prosopis ruscifolia* |  |  |  |  |  | 1 |  |  | 1 |
| 557 | *Gonopterodendron sarmientoi* |  |  |  |  |  | 2 |  |  | 2 |
| 558 | *Gonopterodendron sarmientoi+Aspidosperma quebracho-blanco* |  |  |  |  |  | 6 |  |  | 6 |
| 559 | *Gonopterodendron sarmientoi+Aspidosperma quebracho-blanco+Bougainvillea praecox* |  |  |  |  |  | 1 |  |  | 1 |
| 560 | *Gonopterodendron sarmientoi+Aspidosperma quebracho-blanco+Ceiba chodatii* |  |  |  |  |  | 3 |  |  | 3 |
| 561 | *Gonopterodendron sarmientoi+Aspidosperma quebracho-blanco+Prosopis kuntzei* |  |  |  |  |  | 1 |  |  | 1 |
| 562 | *Gonopterodendron sarmientoi+Aspidosperma quebracho-blanco+Prosopis kuntzei+Sarcomphalus mistol* |  |  |  |  |  | 1 |  |  | 1 |
| 563 | *Gonopterodendron sarmientoi+Aspidosperma quebracho-blanco+Salta triflora* |  |  |  |  |  | 3 |  |  | 3 |
| 564 | *Gonopterodendron sarmientoi+Aspidosperma quebracho-blanco+Schinopsis lorentzii* |  |  |  |  |  | 2 |  |  | 2 |
| 565 | *Gonopterodendron sarmientoi+Aspidosperma quebracho-blanco+Schinopsis lorentzii+Sideroxylon obtusifolium* |  |  |  |  |  | 1 |  |  | 1 |
| 566 | *Gonopterodendron sarmientoi+Aspidosperma quebracho-blanco+Tabebuia nodosa* |  |  |  |  |  | 1 |  |  | 1 |
| 567 | *Gonopterodendron sarmientoi+Aspidosperma quebracho-blanco+Tabebuia nodosa+Salta triflora* |  |  |  |  |  | 1 |  |  | 1 |
| 568 | *Gonopterodendron sarmientoi+Bougainvillea praecox+Ceiba chodatii+Sarcotoxicum salicifolium* |  |  |  |  |  | 1 |  |  | 1 |
| 569 | *Gonopterodendron sarmientoi+Bougainvillea praecox+Salta triflora+Prosopis kuntzei* |  |  |  |  |  | 1 |  |  | 1 |
| 570 | *Gonopterodendron sarmientoi+Calycophyllum multiflorum+Tabebuia nodosa+Phyllostylon rhamnoides* |  |  |  |  |  | 1 |  |  | 1 |
| 571 | *Gonopterodendron sarmientoi+Chloroleucon chacoense+Prosopis ruscifolia* |  |  |  |  |  | 1 |  |  | 1 |
| 572 | *Gonopterodendron sarmientoi+Prosopis elata+Tabebuia nodosa* |  |  |  |  |  | 1 |  |  | 1 |
| 573 | *Gonopterodendron sarmientoi+Prosopis ruscifolia* |  |  |  |  |  | 4 |  |  | 4 |
| 574 | *Gonopterodendron sarmientoi+Prosopis ruscifolia+Tabebuia nodosa* |  |  |  |  |  | 1 |  |  | 1 |
| 575 | *Gonopterodendron sarmientoi+Salta triflora* |  |  |  |  |  | 5 |  |  | 5 |
| 576 | *Gonopterodendron sarmientoi+Salta triflora+Aspidosperma quebracho-blanco* |  |  |  |  |  | 3 |  |  | 3 |
| 577 | *Gonopterodendron sarmientoi+Salta triflora+Aspidosperma quebracho-blanco+Bougainvillea praecox* |  |  |  |  |  | 1 |  |  | 1 |
| 578 | *Gonopterodendron sarmientoi+Salta triflora+Bougainvillea praecox* |  |  |  |  |  | 2 |  |  | 2 |
| 579 | *Gonopterodendron sarmientoi+Salta triflora+Ceiba chodatii+Bougainvillea praecox* |  |  |  |  |  | 1 |  |  | 1 |
| 580 | *Gonopterodendron sarmientoi+Salta triflora+Sarcomphalus mistol+Aspidosperma quebracho-blanco* |  |  |  |  |  | 1 |  |  | 1 |
| 581 | *Gonopterodendron sarmientoi+Salta triflora+Sarcomphalus mistol+Ximenia americana* |  |  |  |  |  | 1 |  |  | 1 |
| 582 | *Gonopterodendron sarmientoi+Salta triflora+Schinopsis lorentzii* |  |  |  |  |  | 1 |  |  | 1 |
| 583 | *Gonopterodendron sarmientoi+Salta triflora+Schinopsis lorentzii+Tabebuia nodosa* |  |  |  |  |  | 1 |  |  | 1 |
| 584 | *Gonopterodendron sarmientoi+Salta triflora+Tabebuia nodosa* |  |  |  |  |  | 2 |  |  | 2 |
| 585 | *Gonopterodendron sarmientoi+Sarcomphalus mistol* |  |  |  |  |  | 3 |  |  | 3 |
| 586 | *Gonopterodendron sarmientoi+Sarcomphalus mistol+Aspidosperma quebracho-blanco* |  |  |  |  |  | 1 |  |  | 1 |
| 587 | *Gonopterodendron sarmientoi+Sarcomphalus mistol+Aspidosperma quebracho-blanco+Salta triflora* |  |  |  |  |  | 1 |  |  | 1 |
| 588 | *Gonopterodendron sarmientoi+Sarcomphalus mistol+Bougainvillea praecox+Aspidosperma quebracho-blanco* |  |  |  |  |  | 1 |  |  | 1 |
| 589 | *Gonopterodendron sarmientoi+Sarcomphalus mistol+Salta triflora* |  |  |  |  |  | 1 |  |  | 1 |
| 590 | *Gonopterodendron sarmientoi+Sarcomphalus mistol+Salta triflora+Aspidosperma quebracho-blanco* |  |  |  |  |  | 1 |  |  | 1 |
| 591 | *Gonopterodendron sarmientoi+Sarcomphalus mistol+Salta triflora+Ceiba chodatii* |  |  |  |  |  | 1 |  |  | 1 |
| 592 | *Gonopterodendron sarmientoi+Sarcomphalus mistol+Salta triflora+Tabebuia nodosa* |  |  |  |  |  | 1 |  |  | 1 |
| 593 | *Gonopterodendron sarmientoi+Sarcomphalus mistol+Schinopsis lorentzii* |  |  |  |  |  | 1 |  |  | 1 |
| 594 | *Gonopterodendron sarmientoi+Sarcomphalus mistol+Senegalia praecox+Salta triflora* |  |  |  |  |  | 1 |  |  | 1 |
| 595 | *Gonopterodendron sarmientoi+Sarcomphalus mistol+Tabebuia nodosa* |  |  |  |  |  | 1 |  |  | 1 |
| 596 | *Gonopterodendron sarmientoi+Sarcotoxicum salicifolium* |  |  |  |  |  | 1 |  |  | 1 |
| 597 | *Gonopterodendron sarmientoi+Schinopsis lorentzii+Prosopis nigra* |  |  |  |  |  | 1 |  |  | 1 |
| 598 | *Gonopterodendron sarmientoi+Sideroxylon obtusifolium+Salta triflora* |  |  |  |  |  | 1 |  |  | 1 |
| 599 | *Gonopterodendron sarmientoi+Sideroxylon obtusifolium+Schinopsis lorentzii* |  |  |  |  |  | 1 |  |  | 1 |
| 600 | *Gonopterodendron sarmientoi+Tabebuia nodosa* |  |  |  |  |  | 4 |  |  | 4 |
| 601 | *Gonopterodendron sarmientoi+Tabebuia nodosa+Aspidosperma quebracho-blanco* |  |  |  |  |  | 3 |  |  | 3 |
| 602 | *Gonopterodendron sarmientoi+Tabebuia nodosa+Ceiba chodatii+Aspidosperma quebracho-blanco* |  |  |  |  |  | 1 |  |  | 1 |
| 603 | *Gonopterodendron sarmientoi+Tabebuia nodosa+Prosopis kuntzei* |  |  |  |  |  | 1 |  |  | 1 |
| 604 | *Gonopterodendron sarmientoi+Tabebuia nodosa+Salta triflora+Aspidosperma quebracho-blanco* |  |  |  |  |  | 1 |  |  | 1 |
| 605 | *Gonopterodendron sarmientoi+Tabebuia nodosa+Sarcomphalus mistol* |  |  |  |  |  | 1 |  |  | 1 |
| 606 | *Gonopterodendron sarmientoi+Tabebuia nodosa+Schinopsis lorentzii+Salta triflora* |  |  |  |  |  | 1 |  |  | 1 |
| 607 | *Gonopterodendron sarmientoi+Tabebuia nodosa+Ximenia americana* |  |  |  |  |  | 1 |  |  | 1 |
| ***Helietta apiculata + others*** | |  |  |  |  |  |  |  |  |  |
| 608 | *Helietta apiculata+Albizia niopoides+Prunus brasiliensis* |  |  |  |  |  |  | 1 |  | 1 |
| 609 | *Helietta apiculata+Annona neosalicifolia+Myrocarpus frondosus+Eugenia myrcianthes* |  |  |  |  |  |  | 1 |  | 1 |
| 610 | *Helietta apiculata+Cordia americana+Myrcianthes pungens* |  |  |  |  |  |  | 1 |  | 1 |
| 611 | *Helietta apiculata+Luehea divaricata+Zanthoxylum fagara+Cordia americana* |  |  |  |  |  |  | 1 |  | 1 |
| 612 | *Helietta apiculata+Machaerium stipitatum+Diatenopteryx sorbifolia* |  |  |  |  |  |  | 1 |  | 1 |
| 613 | *Helietta apiculata+Nectandra angustifolia+Cupania vernalis* |  |  |  |  |  |  | 1 |  | 1 |
| ***Lamiaceae + others*** | |  |  |  |  |  |  |  |  |  |
| 614 | *Vitex megapotamica+Cordia americana+Muellera campestris* |  |  |  |  |  |  | 1 |  | 1 |
| 615 | *Vitex megapotamica+Luehea divaricata* |  |  |  |  |  |  | 1 |  | 1 |
| 616 | *Vitex megapotamica+Muellera campestris+Apuleia leiocarpa* |  |  |  |  |  |  | 1 |  | 1 |
| 617 | *Vitex megapotamica+Prunus brasiliensis+Plinia rivularis* |  |  |  |  |  |  | 1 |  | 1 |
| ***Lauraceae + others*** | |  |  |  |  |  |  |  |  |  |
| 618 | *Balfourodendron riedelianum+Ateleia glazioveana+Nectandra lanceolata+Machaerium stipitatum* |  |  |  |  |  |  | 1 |  | 1 |
| 619 | *Balfourodendron riedelianum+Campomanesia xanthocarpa+Aspidosperma australe+Machaerium stipitatum* |  |  |  |  |  |  | 1 |  | 1 |
| 620 | *Balfourodendron riedelianum+Holocalyx balansae+Prunus brasiliensis* |  |  |  |  |  |  | 1 |  | 1 |
| 621 | *Balfourodendron riedelianum+Nectandra lanceolata+Nectandra angustifolia+Cordia trichotoma* |  |  |  |  |  |  | 1 |  | 1 |
| 622 | *Eugenia burkartiana+Chrysophyllum gonocarpum+Bastardiopsis densiflora* |  |  |  |  |  |  | 1 |  | 1 |
| 623 | *Myrcianthes pungens+Holocalyx balansae+Sideroxylon obtusifolium* |  |  |  |  |  |  | 1 |  | 1 |
| 624 | *Myrcianthes pungens+Luehea divaricata+Helietta apiculata+Cordia americana* |  |  |  |  |  |  | 1 |  | 1 |
| 625 | *Nectandra angustifolia+Albizia inundata* |  | 1 |  |  |  |  |  |  | 1 |
| 626 | *Nectandra angustifolia+Bastardiopsis densiflora* |  |  |  |  |  |  | 1 |  | 1 |
| 627 | *Nectandra angustifolia+Campomanesia xanthocarpa+Parapiptadenia rigida+Styrax leprosus* |  |  |  |  |  |  | 1 |  | 1 |
| 628 | *Nectandra angustifolia+Cedrela fissilis+Ocotea puberula* |  |  |  |  |  |  | 1 |  | 1 |
| 629 | *Nectandra angustifolia+Chrysophyllum gonocarpum+Chrysophyllum marginatum* |  |  |  |  |  |  | 1 |  | 1 |
| 630 | *Nectandra angustifolia+Cordia americana+Maclura tinctoria* |  |  |  |  |  |  | 1 |  | 1 |
| 631 | *Nectandra angustifolia+Cordia americana+Muellera campestris* |  |  |  |  |  |  | 1 |  | 1 |
| 632 | *Nectandra angustifolia+Croton urucurana+Albizia inundata* |  | 1 |  |  |  |  |  |  | 1 |
| 633 | *Nectandra angustifolia+Erythrina falcata+Allophylus edulis* |  |  |  |  |  |  | 1 |  | 1 |
| 634 | *Nectandra angustifolia+Erythrina falcata+Ocotea puberula+Cedrela fissilis* |  |  |  |  |  |  | 1 |  | 1 |
| 635 | *Nectandra angustifolia+Ficus luschnathiana+Cabralea canjerana* |  |  |  |  |  |  | 1 |  | 1 |
| 636 | *Nectandra angustifolia+Holocalyx balansae+Cordia trichotoma* |  |  |  |  |  |  | 1 |  | 1 |
| 637 | *Nectandra angustifolia+Jacaratia spinosa+Pisonia zapallo* |  |  |  |  |  |  | 1 |  | 1 |
| 638 | *Nectandra angustifolia+Lonchocarpus muehlbergianus+Muellera campestris* |  |  |  |  |  |  | 1 |  | 1 |
| 639 | *Nectandra angustifolia+Luehea divaricata+Jacaratia spinosa+Machaerium stipitatum* |  |  |  |  |  |  | 1 |  | 1 |
| 640 | *Nectandra angustifolia+Luehea divaricata+Muellera campestris* |  |  |  |  |  |  | 1 |  | 1 |
| 641 | *Nectandra angustifolia+Machaerium stipitatum+Pilocarpus pennatifolius* |  |  |  |  |  |  | 1 |  | 1 |
| 642 | *Nectandra angustifolia+Machaerium stipitatum+Ruprechtia laxiflora* |  |  |  |  |  |  | 1 |  | 1 |
| 643 | *Nectandra angustifolia+Muellera campestris+Cordia americana* |  |  |  |  |  |  | 1 |  | 1 |
| 644 | *Nectandra angustifolia+Muellera campestris+Lonchocarpus muehlbergianus+Cupania vernalis* |  |  |  |  |  |  | 1 |  | 1 |
| 645 | *Nectandra angustifolia+Muellera campestris+Ocotea puberula+Nectandra lanceolata* |  |  |  |  |  |  | 1 |  | 1 |
| 646 | *Nectandra angustifolia+Myrocarpus frondosus+Holocalyx balansae+Jacaratia spinosa* |  |  |  |  |  |  | 1 |  | 1 |
| 647 | *Nectandra angustifolia+Nectandra lanceolata+Campomanesia xanthocarpa+Zanthoxylum petiolare* |  |  |  |  |  |  | 1 |  | 1 |
| 648 | *Nectandra angustifolia+Ocotea puberula+Picrasma crenata* |  |  |  |  |  |  | 1 |  | 1 |
| 649 | *Nectandra angustifolia+Parapiptadenia rigida+Luehea divaricata* |  |  |  |  |  |  | 1 |  | 1 |
| 650 | *Nectandra angustifolia+Parapiptadenia rigida+Machaerium stipitatum* |  |  |  |  |  |  | 1 |  | 1 |
| 651 | *Nectandra angustifolia+Phytolacca dioica* |  |  |  |  |  |  | 1 |  | 1 |
| 652 | *Nectandra angustifolia+Ruprechtia laxiflora+Diatenopteryx sorbifolia+Enterolobium contortisiliquum* |  |  |  |  |  |  | 1 |  | 1 |
| 653 | *Nectandra angustifolia+Syagrus romanzoffiana+Achatocarpus praecox+Muellera campestris* |  |  |  |  |  |  | 1 |  | 1 |
| 654 | *Nectandra angustifolia+Zanthoxylum rhoifolium+Campomanesia xanthocarpa* |  |  |  |  |  |  | 1 |  | 1 |
| 655 | *Nectandra cuspidata+Cedrela angustifolia+Myrsine laetevirens* |  |  |  |  |  |  |  | 1 | 1 |
| 656 | *Nectandra lanceolata+Maclura tinctoria+Cabralea canjerana+Chrysophyllum gonocarpum* |  |  |  |  |  |  | 1 |  | 1 |
| 657 | *Nectandra lanceolata+Nectandra angustifolia+Guarea macrophylla* |  |  |  |  |  |  | 1 |  | 1 |
| 658 | *Nectandra lanceolata+Ocotea puberula+Schinus terebinthifolius* |  |  |  |  |  |  | 1 |  | 1 |
| 659 | *Ocotea acutifolia+Inga affinis* |  |  |  |  |  | 1 |  |  | 1 |
| 660 | *Ocotea porphyria* |  |  |  |  |  |  |  | 4 | 4 |
| 661 | *Ocotea porphyria+Alnus acuminata+Cordia americana+Styrax subargenteus* |  |  |  |  |  |  |  | 1 | 1 |
| 662 | *Ocotea porphyria+Chrysophyllum marginatum* |  |  |  |  |  |  |  | 1 | 1 |
| 663 | *Ocotea porphyria+Cupania vernalis* |  |  |  |  |  |  |  | 1 | 1 |
| 664 | *Ocotea porphyria+Juglans australis+Erythroxylum argentinum* |  |  |  |  |  |  |  | 1 | 1 |
| 665 | *Ocotea porphyria+Myrcianthes pseudomato* |  |  |  |  |  |  |  | 1 | 1 |
| 666 | *Ocotea porphyria+Myrcianthes pungens* |  |  |  |  |  |  |  | 1 | 1 |
| 667 | *Ocotea porphyria+Parapiptadenia excelsa* |  |  |  |  |  |  |  | 1 | 1 |
| 668 | *Ocotea porphyria+Pisonia zapallo+Anadenanthera colubrina+Myrcianthes pseudomato* |  |  |  |  |  |  |  | 1 | 1 |
| 669 | *Ocotea porphyria+Tessaria integrifolia+Pisonia zapallo* |  |  |  |  |  |  |  | 1 | 1 |
| 670 | *Ocotea porphyria+Zanthoxylum coco+Erythrina falcata* |  |  |  |  |  |  |  | 1 | 1 |
| 671 | *Ocotea puberula+Cedrela balansae+Piper tucumanum* |  |  |  |  |  |  |  | 1 | 1 |
| 672 | *Ocotea puberula+Cedrela fissilis* |  |  |  |  |  |  | 1 |  | 1 |
| 673 | *Ocotea puberula+Cupania vernalis+Urera caracasana* |  |  |  |  |  |  |  | 1 | 1 |
| 674 | *Ocotea puberula+Guazuma ulmifolia+Cordia americana* |  |  |  |  |  | 1 |  |  | 1 |
| 675 | *Ocotea puberula+Juglans australis+Anadenanthera colubrina* |  |  |  |  |  |  |  | 1 | 1 |
| 676 | *Ocotea puberula+Machaerium paraguariense* |  |  |  |  |  |  | 1 |  | 1 |
| 677 | *Ocotea puberula+Myrcianthes mato* |  |  |  |  |  |  |  | 1 | 1 |
| 678 | *Ocotea puberula+Myrcianthes pseudomato+Inga edulis* |  |  |  |  |  |  |  | 1 | 1 |
| 679 | *Ocotea puberula+Parapiptadenia excelsa+Croton piluliferus* |  |  |  |  |  |  |  | 1 | 1 |
| 680 | *Pisonia zapallo+Ruprechtia laxiflora+Apuleia leiocarpa* |  |  |  |  |  |  | 1 |  | 1 |
| 681 | *Plinia rivularis+Parapiptadenia rigida+Helietta apiculata* |  |  |  |  |  |  | 1 |  | 1 |
| 682 | *Ruprechtia laxiflora* |  |  |  |  |  |  | 1 |  | 1 |
| 683 | *Ruprechtia laxiflora+Muellera campestris+Erythrina falcata* |  |  |  |  |  |  | 1 |  | 1 |
| 684 | *Urera caracasana+Ocotea porphyria+Inga marginata* |  |  |  |  |  |  |  | 1 | 1 |
| ***Luehea divaricata + others*** | |  |  |  |  |  |  |  |  |  |
| 685 | *Luehea divaricata+Ateleia glazioveana* |  |  |  |  |  |  | 1 |  | 1 |
| 686 | *Luehea divaricata+Gleditsia amorphoides+Helietta apiculata+Sebastiania commersoniana* |  |  |  |  |  |  | 1 |  | 1 |
| 687 | *Luehea divaricata+Nectandra angustifolia+Vitex megapotamica* |  |  |  |  |  |  | 1 |  | 1 |
| 688 | *Luehea divaricata+Nectandra lanceolata+Phytolacca dioica* |  |  |  |  |  |  | 1 |  | 1 |
| 689 | *Luehea divaricata+Parapiptadenia rigida+Holocalyx balansae* |  |  |  |  |  |  | 1 |  | 1 |
| 690 | *Luehea divaricata+Prunus brasiliensis+Albizia niopoides+Ocotea puberula* |  |  |  |  |  |  | 1 |  | 1 |
| 691 | *Luehea divaricata+Ruprechtia laxiflora+Balfourodendron riedelianum* |  |  |  |  |  |  | 1 |  | 1 |
| 692 | *Luehea divaricata+Sebastiania commersoniana+Annona neosalicifolia* |  |  |  |  |  |  | 1 |  | 1 |
| 693 | *Luehea divaricata+Sebastiania commersoniana+Vitex megapotamica* |  |  |  |  |  |  | 1 |  | 1 |
| 694 | *Zanthoxylum rhoifolium+Ilex brevicuspis+Luehea divaricata* |  |  |  |  |  |  | 1 |  | 1 |
| ***Meliaceae + others*** | |  |  |  |  |  |  |  |  |  |
| 695 | *Cabralea canjerana+Machaerium stipitatum+Didymopanax morototoni* |  |  |  |  |  |  | 1 |  | 1 |
| 696 | *Cabralea canjerana+Tabernaemontana catharinensis+Machaerium stipitatum+Albizia niopoides* |  |  |  |  |  |  | 1 |  | 1 |
| 697 | *Cedrela angustifolia+Juglans australis+Myrsine laetevirens+Ocotea porphyria* |  |  |  |  |  |  |  | 1 | 1 |
| 698 | *Cedrela angustifolia+Parapiptadenia excelsa* |  |  |  |  |  |  |  | 1 | 1 |
| 699 | *Cedrela angustifolia+Piper tucumanum+Ateleia glazioveana* |  |  |  |  |  |  |  | 1 | 1 |
| 700 | *Cedrela balansae* |  |  |  |  |  |  |  | 1 | 1 |
| 701 | *Cedrela balansae+Boehmeria caudata+Urera caracasana* |  |  |  |  |  |  |  | 1 | 1 |
| 702 | *Cedrela balansae+Cordia americana+Gleditsia amorphoides+Enterolobium contortisiliquum* |  |  |  |  |  |  |  | 1 | 1 |
| 703 | *Cedrela balansae+Myrcianthes pseudomato* |  |  |  |  |  |  |  | 1 | 1 |
| 704 | *Cedrela balansae+Myrcianthes pungens+Blepharocalyx salicifolius+Erythrina falcata* |  |  |  |  |  |  |  | 1 | 1 |
| 705 | *Cedrela balansae+Ocotea puberula+Cordia americana* |  |  |  |  |  |  |  | 1 | 1 |
| 706 | *Cedrela balansae+Pisonia zapallo+Myracrodruon urundeuva* |  |  |  |  |  |  |  | 1 | 1 |
| 707 | *Cedrela fissilis+Syagrus romanzoffiana+Balfourodendron riedelianum* |  |  |  |  |  |  | 1 |  | 1 |
| 708 | *Cedrela saltensis+Cedrela angustifolia* |  |  |  |  |  |  |  | 1 | 1 |
| 709 | *Guarea kunthiana+Myrocarpus frondosus+Inga uraguensis+Prunus subcoriacea* |  |  |  |  |  |  | 1 |  | 1 |
| 710 | *Trichilia catigua+Syagrus romanzoffiana+Cedrela fissilis* |  |  |  |  |  |  | 1 |  | 1 |
| 711 | *Trichilia claussenii+Gleditsia amorphoides+Anadenanthera colubrina+Duranta serratifolia* |  |  |  |  |  |  |  | 1 | 1 |
| ***Mimosoideae + others*** | |  |  |  |  |  |  |  |  |  |
| 712 | *Albizia inundata* |  |  |  |  |  | 1 |  |  | 1 |
| 713 | *Albizia inundata+Diplokeleba floribunda+Microlobius foetidus* |  |  |  |  |  | 1 |  |  | 1 |
| 714 | *Albizia inundata+Sapium haematospermum+Prosopis nigra* |  |  |  |  |  | 1 |  |  | 1 |
| 715 | *Anadenanthera colubrina* |  |  |  |  |  | 2 |  | 10 | 12 |
| 716 | *Anadenanthera colubrina+Athyana weinmanniifolia* |  |  |  |  |  | 1 |  |  | 1 |
| 717 | *Anadenanthera colubrina+Calycophyllum multiflorum* |  |  |  |  |  |  |  | 2 | 2 |
| 718 | *Anadenanthera colubrina+Carica quercifolia* |  |  |  |  |  |  |  | 1 | 1 |
| 719 | *Anadenanthera colubrina+Carica quercifolia+Tipuana tipu+Ruprechtia apetala* |  |  |  |  |  |  |  | 1 | 1 |
| 720 | *Anadenanthera colubrina+Cedrela balansae* |  |  |  |  |  |  |  | 2 | 2 |
| 721 | *Anadenanthera colubrina+Cedrela balansae+Myracrodruon urundeuva* |  |  |  |  |  |  |  | 1 | 1 |
| 722 | *Anadenanthera colubrina+Cedrela saltensis* |  |  |  |  |  |  |  | 1 | 1 |
| 723 | *Anadenanthera colubrina+Ceiba chodatii+Calycophyllum multiflorum* |  |  |  |  |  |  |  | 2 | 2 |
| 724 | *Anadenanthera colubrina+Ceiba chodatii+Phyllostylon rhamnoides+Cochlospermum tetraporum* |  |  |  |  |  |  |  | 1 | 1 |
| 725 | *Anadenanthera colubrina+Celtis ehrenbergiana* |  |  |  |  |  |  |  | 1 | 1 |
| 726 | *Anadenanthera colubrina+Cordia americana+Gleditsia amorphoides+Maclura tinctoria* |  |  |  |  |  |  |  | 1 | 1 |
| 727 | *Anadenanthera colubrina+Cordia trichotoma+Myrcianthes pungens* |  |  |  |  |  |  |  | 1 | 1 |
| 728 | *Anadenanthera colubrina+Coutarea hexandra* |  |  |  |  |  |  |  | 1 | 1 |
| 729 | *Anadenanthera colubrina+Enterolobium contortisiliquum+Cordia americana* |  |  |  |  |  |  |  | 1 | 1 |
| 730 | *Anadenanthera colubrina+Libidibia paraguariensis+Phyllostylon rhamnoides* |  |  |  |  |  |  |  | 1 | 1 |
| 731 | *Anadenanthera colubrina+Lonchocarpus lilloi+Ceiba chodatii* |  |  |  |  |  |  |  | 1 | 1 |
| 732 | *Anadenanthera colubrina+Lonchocarpus lilloi+Trichilia claussenii+Urera caracasana* |  |  |  |  |  |  |  | 1 | 1 |
| 733 | *Anadenanthera colubrina+Myracrodruon urundeuva* |  |  |  |  |  |  |  | 1 | 1 |
| 734 | *Anadenanthera colubrina+Myracrodruon urundeuva+Agonandra excelsa+Cordia saccelia* |  |  |  |  |  |  |  | 1 | 1 |
| 735 | *Anadenanthera colubrina+Myracrodruon urundeuva+Phyllostylon rhamnoides* |  |  |  |  |  |  |  | 1 | 1 |
| 736 | *Anadenanthera colubrina+Ocotea puberula* |  |  |  |  |  |  |  | 1 | 1 |
| 737 | *Anadenanthera colubrina+Ocotea puberula+Diatenopteryx sorbifolia* |  |  |  |  |  |  |  | 1 | 1 |
| 738 | *Anadenanthera colubrina+Parapiptadenia excelsa* |  |  |  |  |  | 3 |  | 2 | 5 |
| 739 | *Anadenanthera colubrina+Phyllostylon rhamnoides* |  |  |  |  |  |  |  | 2 | 2 |
| 740 | *Anadenanthera colubrina+Phyllostylon rhamnoides+Myrcianthes pungens+Pisonia zapallo* |  |  |  |  |  |  |  | 1 | 1 |
| 741 | *Anadenanthera colubrina+Phyllostylon rhamnoides+Ruprechtia apetala* |  |  |  |  |  |  |  | 1 | 1 |
| 742 | *Anadenanthera colubrina+Pisonia zapallo+Phyllostylon rhamnoides* |  |  |  |  |  |  |  | 1 | 1 |
| 743 | *Anadenanthera colubrina+Pisonia zapallo+Phyllostylon rhamnoides+Sideroxylon obtusifolium* |  |  |  |  |  |  |  | 1 | 1 |
| 744 | *Anadenanthera colubrina+Pterogyne nitens* |  |  |  |  |  |  |  | 1 | 1 |
| 745 | *Anadenanthera colubrina+Rhamnus sphaerosperma* |  |  |  |  |  |  |  | 1 | 1 |
| 746 | *Anadenanthera colubrina+Ruprechtia apetala* |  |  |  |  |  | 2 |  |  | 2 |
| 747 | *Anadenanthera colubrina+Ruprechtia apetala+Schinopsis lorentzii* |  |  |  |  |  | 1 |  |  | 1 |
| 748 | *Anadenanthera colubrina+Salta triflora+Sarcomphalus mistol* |  |  |  |  |  | 1 |  |  | 1 |
| 749 | *Anadenanthera colubrina+Schinopsis lorentzii* |  |  |  |  |  | 2 |  |  | 2 |
| 750 | *Anadenanthera colubrina+Schinopsis lorentzii+Pisonia zapallo* |  |  |  |  |  |  |  | 1 | 1 |
| 751 | *Anadenanthera colubrina+Senegalia praecox+Ruprechtia apetala* |  |  |  |  |  | 1 |  |  | 1 |
| 752 | *Anadenanthera colubrina+Solanum granulosum-leprosum* |  |  |  |  |  |  |  | 1 | 1 |
| 753 | *Anadenanthera colubrina+Terminalia triflora+Cordia americana* |  |  |  |  |  |  |  | 1 | 1 |
| 754 | *Anadenanthera colubrina+Tipuana tipu+Ceiba chodatii* |  |  |  |  |  | 1 |  |  | 1 |
| 755 | *Anadenanthera colubrina+Tipuana tipu+Ocotea puberula+Parapiptadenia excelsa* |  |  |  |  |  |  |  | 1 | 1 |
| 756 | *Bougainvillea campanulata+Vachellia caven* |  |  |  |  |  | 1 |  |  | 1 |
| 757 | *Casearia sylvestris+Enterolobium contortisiliquum* |  |  |  |  |  | 1 |  |  | 1 |
| 758 | *Ceiba chodatii+Anadenanthera colubrina+Parapiptadenia excelsa* |  |  |  |  |  |  |  | 1 | 1 |
| 759 | *Chloroleucon tenuiflorum+Myracrodruon urundeuva* |  |  |  |  |  |  |  | 1 | 1 |
| 760 | *Cochlospermum tetraporum+Anadenanthera colubrina* |  |  |  |  |  |  |  | 1 | 1 |
| 761 | *Enterolobium contortisiliquum* |  |  |  |  |  | 3 |  |  | 3 |
| 762 | *Enterolobium contortisiliquum+Annona neosalicifolia* |  |  |  |  |  |  | 1 |  | 1 |
| 763 | *Enterolobium contortisiliquum+Gleditsia amorphoides* |  |  |  |  |  | 1 |  |  | 1 |
| 764 | *Enterolobium contortisiliquum+Myracrodruon balansae+Libidibia paraguariensis+Cordia americana* |  |  |  |  |  | 1 |  |  | 1 |
| 765 | *Enterolobium contortisiliquum+Ocotea porphyria+Heliocarpus popayanensis* |  |  |  |  |  |  |  | 1 | 1 |
| 766 | *Enterolobium contortisiliquum+Zanthoxylum coco+Ruprechtia laxiflora+Gleditsia amorphoides* |  |  |  |  |  |  |  | 1 | 1 |
| 767 | *Gleditsia amorphoides+Celtis iguanaea+Libidibia paraguariensis* |  |  |  |  |  | 1 |  |  | 1 |
| 768 | *Gleditsia amorphoides+Cordia americana* |  |  |  |  |  | 2 |  |  | 2 |
| 769 | *Gleditsia amorphoides+Cordia americana+Handroanthus impetiginosus* |  |  |  |  |  | 1 |  |  | 1 |
| 770 | *Gleditsia amorphoides+Cordia americana+Sideroxylon obtusifolium+Ruprechtia laxiflora* |  |  |  |  |  | 1 |  |  | 1 |
| 771 | *Gleditsia amorphoides+Diplokeleba floribunda+Aspidosperma quebracho-blanco* |  |  |  |  |  | 1 |  |  | 1 |
| 772 | *Gleditsia amorphoides+Enterolobium contortisiliquum+Nectandra angustifolia* |  |  |  |  |  | 1 |  |  | 1 |
| 773 | *Gleditsia amorphoides+Enterolobium contortisiliquum+Prosopis alba* |  |  |  |  |  | 1 |  |  | 1 |
| 774 | *Gleditsia amorphoides+Holocalyx balansae+Chrysophyllum gonocarpum+Handroanthus heptaphyllus* |  |  |  |  |  | 1 |  |  | 1 |
| 775 | *Gleditsia amorphoides+Libidibia paraguariensis+Aspidosperma quebracho-blanco* |  |  |  |  |  | 1 |  |  | 1 |
| 776 | *Gleditsia amorphoides+Myracrodruon balansae+Phyllostylon rhamnoides+Diplokeleba floribunda* |  |  |  |  |  | 1 |  |  | 1 |
| 777 | *Gleditsia amorphoides+Myrsine coriacea+Tipuana tipu* |  |  |  |  |  |  |  | 1 | 1 |
| 778 | *Gleditsia amorphoides+Phyllostylon rhamnoides+Pisonia zapallo+Cordia americana* |  |  |  |  |  | 1 |  |  | 1 |
| 779 | *Gleditsia amorphoides+Phyllostylon rhamnoides+Prosopis kuntzei* |  |  |  |  |  | 1 |  |  | 1 |
| 780 | *Gleditsia amorphoides+Pouteria glomerata+Nectandra angustifolia* |  |  |  |  |  | 1 |  |  | 1 |
| 781 | *Gleditsia amorphoides+Prosopis alba+Ruprechtia laxiflora* |  |  |  |  |  | 1 |  |  | 1 |
| 782 | *Gleditsia amorphoides+Ruprechtia laxiflora* |  |  |  |  |  | 1 |  |  | 1 |
| 783 | *Gleditsia amorphoides+Ruprechtia laxiflora+Phyllostylon rhamnoides* |  |  |  |  |  | 1 |  |  | 1 |
| 784 | *Gleditsia amorphoides+Schinopsis balansae+Cordia americana* |  |  |  |  |  | 1 |  |  | 1 |
| 785 | *Gleditsia amorphoides+Scutia buxifolia* |  |  |  |  |  | 1 |  |  | 1 |
| 786 | *Gleditsia amorphoides+Senegalia praecox+Aspidosperma quebracho-blanco* |  |  |  |  |  | 1 |  |  | 1 |
| 787 | *Gleditsia amorphoides+Vachellia aroma+Phyllostylon rhamnoides+Prosopis nigra* |  |  |  |  |  | 1 |  |  | 1 |
| 788 | *Inga marginata+Luehea divaricata+Enterolobium contortisiliquum+Quillaja brasiliensis* |  |  |  |  |  |  | 1 |  | 1 |
| 789 | *Inga saltensis+Ocotea puberula* |  |  |  |  |  |  |  | 1 | 1 |
| 790 | *Inga uraguensis* |  | 1 |  |  |  |  | 1 |  | 2 |
| 791 | *Lithraea molleoides+Enterolobium contortisiliquum* |  |  |  |  |  |  | 1 |  | 1 |
| 792 | *Microlobius foetidus+Copernicia alba+Phoradendron habrostachyum* |  |  |  |  |  | 1 |  |  | 1 |
| 793 | *Mimosa bimucronata* |  |  | 1 |  |  |  |  |  | 1 |
| 794 | *Mimozyganthus carinatus* |  |  |  |  |  | 4 |  |  | 4 |
| 795 | *Mimozyganthus carinatus+Aspidosperma quebracho-blanco* |  |  |  |  |  | 1 |  |  | 1 |
| 796 | *Mimozyganthus carinatus+Aspidosperma quebracho-blanco+Bougainvillea praecox* |  |  |  |  |  | 1 |  |  | 1 |
| 797 | *Mimozyganthus carinatus+Prosopis flexuosa* |  |  |  |  |  | 1 |  |  | 1 |
| 798 | *Mimozyganthus carinatus+Salta triflora* |  |  |  |  |  | 1 |  |  | 1 |
| 799 | *Mimozyganthus carinatus+Sarcomphalus mistol* |  |  |  |  |  | 1 |  |  | 1 |
| 800 | *Mimozyganthus carinatus+Sarcomphalus mistol+Aspidosperma quebracho-blanco* |  |  |  |  |  | 2 |  |  | 2 |
| 801 | *Mimozyganthus carinatus+Sarcomphalus mistol+Bougainvillea stipitata* |  |  |  |  |  | 1 |  |  | 1 |
| 802 | *Mimozyganthus carinatus+Tabebuia nodosa* |  |  |  |  |  | 1 |  |  | 1 |
| 803 | *Myroxylon peruiferum+Anadenanthera colubrina* |  |  |  |  |  |  |  | 1 | 1 |
| 804 | *Parapiptadenia excelsa* |  |  |  |  |  | 1 |  | 2 | 3 |
| 805 | *Parapiptadenia excelsa+Anadenanthera colubrina* |  |  |  |  |  | 1 |  | 2 | 3 |
| 806 | *Parapiptadenia excelsa+Anadenanthera colubrina+Cordia trichotoma+Cedrela balansae* |  |  |  |  |  |  |  | 1 | 1 |
| 807 | *Parapiptadenia excelsa+Anadenanthera colubrina+Piptadenia viridiflora+Phyllostylon rhamnoides* |  |  |  |  |  |  |  | 1 | 1 |
| 808 | *Parapiptadenia excelsa+Anadenanthera colubrina+Pisonia zapallo+Calycophyllum multiflorum* |  |  |  |  |  |  |  | 1 | 1 |
| 809 | *Parapiptadenia excelsa+Anadenanthera colubrina+Schinopsis lorentzii+Phyllostylon rhamnoides* |  |  |  |  |  |  |  | 1 | 1 |
| 810 | *Parapiptadenia excelsa+Blepharocalyx salicifolius+Allophylus edulis* |  |  |  |  |  | 1 |  |  | 1 |
| 811 | *Parapiptadenia excelsa+Enterolobium contortisiliquum+Anadenanthera colubrina+Zanthoxylum coco* |  |  |  |  |  |  |  | 1 | 1 |
| 812 | *Parapiptadenia excelsa+Gleditsia amorphoides* |  |  |  |  |  |  |  | 1 | 1 |
| 813 | *Parapiptadenia excelsa+Myrcianthes cisplatensis* |  |  |  |  |  | 1 |  |  | 1 |
| 814 | *Parapiptadenia excelsa+Myrcianthes mato+Ceiba chodatii* |  |  |  |  |  |  |  | 1 | 1 |
| 815 | *Parapiptadenia excelsa+Myrcianthes pungens* |  |  |  |  |  |  |  | 1 | 1 |
| 816 | *Parapiptadenia excelsa+Myrcianthes pungens+Schinopsis lorentzii* |  |  |  |  |  |  |  | 1 | 1 |
| 817 | *Parapiptadenia excelsa+Myroxylon peruiferum+Diatenopteryx sorbifolia* |  |  |  |  |  |  |  | 1 | 1 |
| 818 | *Parapiptadenia excelsa+Pisonia zapallo+Ruprechtia apetala* |  |  |  |  |  |  |  | 1 | 1 |
| 819 | *Parapiptadenia excelsa+Ruprechtia apetala+Celtis ehrenbergiana* |  |  |  |  |  | 1 |  |  | 1 |
| 820 | *Parapiptadenia excelsa+Schinopsis lorentzii* |  |  |  |  |  |  |  | 1 | 1 |
| 821 | *Parapiptadenia excelsa+Tipuana tipu* |  |  |  |  |  |  |  | 1 | 1 |
| 822 | *Parapiptadenia rigida+Machaerium stipitatum+Gleditsia amorphoides+Apuleia leiocarpa* |  |  |  |  |  |  | 1 |  | 1 |
| 823 | *Parapiptadenia rigida+Nectandra angustifolia+Muellera campestris+Cordia americana* |  |  |  |  |  |  | 1 |  | 1 |
| 824 | *Parasenegalia visco* |  |  |  |  |  | 1 |  |  | 1 |
| 825 | *Parasenegalia visco+Libidibia paraguariensis+Celtis ehrenbergiana* |  |  |  |  |  | 1 |  |  | 1 |
| 826 | *Rauvolfia schuelii+Bougainvillea stipitata+Anadenanthera colubrina* |  |  |  |  |  |  |  | 1 | 1 |
| 827 | *Ruprechtia apetala+Senegalia praecox+Celtis ehrenbergiana* |  |  |  |  |  | 1 |  |  | 1 |
| 828 | *Ruprechtia laxiflora+Anadenanthera colubrina+Parapiptadenia excelsa* |  |  |  |  |  |  |  | 1 | 1 |
| 829 | *Sebastiania commersoniana+Vachellia caven* |  |  | 1 |  |  |  |  |  | 1 |
| 830 | *Senegalia fiebrigii+Tabebuia nodosa+Aspidosperma quebracho-blanco* |  |  |  |  |  | 1 |  |  | 1 |
| 831 | *Senegalia gilliesii* |  |  |  |  |  | 1 |  |  | 1 |
| 832 | *Senegalia gilliesii+Aspidosperma quebracho-blanco* |  |  |  |  |  | 1 |  |  | 1 |
| 833 | *Senegalia gilliesii+Aspidosperma quebracho-blanco+Castela coccinea* |  |  |  |  |  | 1 |  |  | 1 |
| 834 | *Senegalia gilliesii+Parkinsonia praecox* |  |  |  |  |  | 2 |  |  | 2 |
| 835 | *Senegalia gilliesii+Prosopis nigra* |  |  |  |  |  | 1 |  |  | 1 |
| 836 | *Senegalia gilliesii+Sarcomphalus mistol+Aspidosperma quebracho-blanco+Vachellia aroma* |  |  |  |  |  | 1 |  |  | 1 |
| 837 | *Senegalia gilliesii+Senegalia praecox* |  |  |  |  |  | 1 |  |  | 1 |
| 838 | *Senegalia gilliesii+Vachellia caven+Ruprechtia apetala+Aspidosperma quebracho-blanco* |  |  |  |  |  | 1 |  |  | 1 |
| 839 | *Senegalia praecox* |  |  |  |  |  | 1 |  |  | 1 |
| 840 | *Senegalia praecox+Achatocarpus praecox* |  |  |  |  |  | 1 |  |  | 1 |
| 841 | *Senegalia praecox+Achatocarpus praecox+Cordia americana* |  |  |  |  |  | 1 |  |  | 1 |
| 842 | *Senegalia praecox+Aspidosperma quebracho-blanco* |  |  |  |  |  | 4 |  |  | 4 |
| 843 | *Senegalia praecox+Aspidosperma quebracho-blanco+Geoffroea decorticans* |  |  |  |  |  | 1 |  |  | 1 |
| 844 | *Senegalia praecox+Aspidosperma quebracho-blanco+Prosopis nigra* |  |  |  |  |  | 1 |  |  | 1 |
| 845 | *Senegalia praecox+Aspidosperma quebracho-blanco+Sarcomphalus mistol* |  |  |  |  |  | 2 |  |  | 2 |
| 846 | *Senegalia praecox+Aspidosperma quebracho-blanco+Sideroxylon obtusifolium+Salta triflora* |  |  |  |  |  | 1 |  |  | 1 |
| 847 | *Senegalia praecox+Celtis chichape+Sarcomphalus mistol* |  |  |  |  |  | 1 |  |  | 1 |
| 848 | *Senegalia praecox+Celtis ehrenbergiana* |  |  |  |  |  | 1 |  |  | 1 |
| 849 | *Senegalia praecox+Celtis iguanaea* |  |  |  |  |  | 1 |  |  | 1 |
| 850 | *Senegalia praecox+Cordia americana* |  |  |  |  |  | 1 |  |  | 1 |
| 851 | *Senegalia praecox+Cordia americana+Prosopis kuntzei* |  |  |  |  |  | 1 |  |  | 1 |
| 852 | *Senegalia praecox+Cordia americana+Schinopsis balansae* |  |  |  |  |  | 1 |  |  | 1 |
| 853 | *Senegalia praecox+Cordia americana+Sideroxylon obtusifolium* |  |  |  |  |  | 1 |  |  | 1 |
| 854 | *Senegalia praecox+Cordia americana+Sideroxylon obtusifolium+Sarcotoxicum salicifolium* |  |  |  |  |  | 1 |  |  | 1 |
| 855 | *Senegalia praecox+Eugenia uniflora+Cordia americana+Libidibia paraguariensis* |  |  |  |  |  | 1 |  |  | 1 |
| 856 | *Senegalia praecox+Geoffroea decorticans* |  |  |  |  |  | 1 |  |  | 1 |
| 857 | *Senegalia praecox+Gleditsia amorphoides+Libidibia paraguariensis+Prosopis alba* |  |  |  |  |  | 1 |  |  | 1 |
| 858 | *Senegalia praecox+Libidibia paraguariensis* |  |  |  |  |  | 1 |  |  | 1 |
| 859 | *Senegalia praecox+Libidibia paraguariensis+Sarcomphalus mistol+Sideroxylon obtusifolium* |  |  |  |  |  | 1 |  |  | 1 |
| 860 | *Senegalia praecox+Pisonia zapallo+Libidibia paraguariensis* |  |  |  |  |  | 1 |  |  | 1 |
| 861 | *Senegalia praecox+Prosopis alba* |  |  |  |  |  | 2 |  |  | 2 |
| 862 | *Senegalia praecox+Prosopis alba+Ruprechtia laxiflora+Prosopis nigra* |  |  |  |  |  | 1 |  |  | 1 |
| 863 | *Senegalia praecox+Prosopis kuntzei* |  |  |  |  |  | 2 |  |  | 2 |
| 864 | *Senegalia praecox+Prosopis kuntzei+Aspidosperma quebracho-blanco* |  |  |  |  |  | 2 |  |  | 2 |
| 865 | *Senegalia praecox+Prosopis kuntzei+Schinopsis lorentzii* |  |  |  |  |  | 1 |  |  | 1 |
| 866 | *Senegalia praecox+Prosopis nigra* |  |  |  |  |  | 2 |  |  | 2 |
| 867 | *Senegalia praecox+Prosopis nigra+Aspidosperma quebracho-blanco* |  |  |  |  |  | 1 |  |  | 1 |
| 868 | *Senegalia praecox+Prosopis nigra+Schinopsis balansae+Copernicia alba* |  |  |  |  |  | 1 |  |  | 1 |
| 869 | *Senegalia praecox+Ruprechtia apetala* |  |  |  |  |  |  |  | 1 | 1 |
| 870 | *Senegalia praecox+Ruprechtia laxiflora+Aspidosperma quebracho-blanco* |  |  |  |  |  | 1 |  |  | 1 |
| 871 | *Senegalia praecox+Ruprechtia laxiflora+Sarcomphalus mistol* |  |  |  |  |  | 1 |  |  | 1 |
| 872 | *Senegalia praecox+Ruprechtia laxiflora+Schinus longifolius* |  |  |  |  |  | 1 |  |  | 1 |
| 873 | *Senegalia praecox+Salta triflora* |  |  |  |  |  | 1 |  |  | 1 |
| 874 | *Senegalia praecox+Sarcomphalus mistol* |  |  |  |  |  | 1 |  |  | 1 |
| 875 | *Senegalia praecox+Sarcomphalus mistol+Aspidosperma quebracho-blanco* |  |  |  |  |  | 1 |  |  | 1 |
| 876 | *Senegalia praecox+Sarcomphalus mistol+Prosopis kuntzei* |  |  |  |  |  | 1 |  |  | 1 |
| 877 | *Senegalia praecox+Sarcomphalus mistol+Schinus longifolius* |  |  |  |  |  | 1 |  |  | 1 |
| 878 | *Senegalia praecox+Schinopsis balansae* |  |  |  |  |  | 3 |  |  | 3 |
| 879 | *Senegalia praecox+Schinopsis balansae+Prosopis nigra* |  |  |  |  |  | 1 |  |  | 1 |
| 880 | *Senegalia praecox+Schinopsis lorentzii+Aspidosperma quebracho-blanco* |  |  |  |  |  | 2 |  |  | 2 |
| 881 | *Senegalia praecox+Schinopsis lorentzii+Jodina rhombifolia* |  |  |  |  |  | 1 |  |  | 1 |
| 882 | *Senegalia praecox+Schinus fasciculatus+Prosopis kuntzei+Cordia americana* |  |  |  |  |  | 1 |  |  | 1 |
| 883 | *Senegalia praecox+Schinus longifolius* |  |  |  |  |  | 1 |  |  | 1 |
| 884 | *Senegalia praecox+Sideroxylon obtusifolium+Diplokeleba floribunda* |  |  |  |  |  | 1 |  |  | 1 |
| 885 | *Senegalia praecox+Tabebuia nodosa* |  |  |  |  |  | 1 |  |  | 1 |
| 886 | *Senegalia praecox+Trithrinax campestris+Maytenus vitis-idaea* |  |  |  |  |  | 1 |  |  | 1 |
| 887 | *Senegalia praecox+Vachellia aroma* |  |  |  |  |  | 1 |  |  | 1 |
| 888 | *Tabernaemontana catharinensis+Enterolobium contortisiliquum+Sapium haematospermum+Ocotea puberula* |  |  |  |  |  | 1 |  |  | 1 |
| 889 | *Vachelia caven + Prosopis* |  |  | 1 |  |  |  |  |  | 1 |
| 890 | *Vachelia caven+Geoffroea decorticans* |  |  | 2 |  |  |  |  |  | 2 |
| 891 | *Vachelia caven+Ruprechtia laxiflora* |  |  | 1 |  |  |  |  |  | 1 |
| 892 | *Vachellia albicorticata* |  |  |  |  |  | 1 |  |  | 1 |
| 893 | *Vachellia aroma* |  |  |  |  |  | 3 |  | 2 | 5 |
| 894 | *Vachellia aroma+Celtis ehrenbergiana+Sarcomphalus mistol* |  |  |  |  |  | 1 |  |  | 1 |
| 895 | *Vachellia aroma+Geoffroea decorticans* |  |  |  |  |  | 1 |  |  | 1 |
| 896 | *Vachellia aroma+Parkinsonia praecox+Sarcomphalus mistol* |  |  |  |  |  | 1 |  |  | 1 |
| 897 | *Vachellia aroma+Prosopis kuntzei* |  |  |  |  |  | 1 |  |  | 1 |
| 898 | *Vachellia aroma+Prosopis nigra* |  |  |  |  |  | 1 |  |  | 1 |
| 899 | *Vachellia aroma+Prosopis nigra+Schinopsis lorentzii* |  |  |  |  |  | 1 |  |  | 1 |
| 900 | *Vachellia aroma+Sarcomphalus mistol* |  |  |  |  |  | 2 |  |  | 2 |
| 901 | *Vachellia aroma+Sarcomphalus mistol+Prosopis nigra* |  |  |  |  |  | 2 |  |  | 2 |
| 902 | *Vachellia aroma+Sarcomphalus mistol+Pterogyne nitens* |  |  |  |  |  | 1 |  |  | 1 |
| 903 | *Vachellia aroma+Scutia buxifolia* |  |  |  |  |  | 1 |  |  | 1 |
| 904 | *Vachellia aroma+Senegalia gilliesii+Aspidosperma quebracho-blanco* |  |  |  |  |  | 1 |  |  | 1 |
| 905 | *Vachellia aroma+Vachellia caven* |  |  |  |  |  | 1 |  |  | 1 |
| 906 | *Vachellia astringens* |  |  |  |  |  | 1 |  |  | 1 |
| 907 | *Vachellia astringens+Aspidosperma quebracho-blanco+Sarcomphalus mistol* |  |  |  |  |  | 1 |  |  | 1 |
| 908 | *Vachellia astringens+Cordia saccelia* |  |  |  |  |  |  |  | 1 | 1 |
| 909 | *Vachellia astringens+Prosopis alba+Vachellia aroma* |  |  |  |  |  | 1 |  |  | 1 |
| 910 | *Vachellia caven* |  | 1 | 14 |  |  | 9 |  | 1 | 25 |
| 911 | *Vachellia caven+Aspidosperma quebracho-blanco* |  |  |  |  |  | 2 |  |  | 2 |
| 912 | *Vachellia caven+Celtis ehrenbergiana* |  |  | 2 |  |  |  |  |  | 2 |
| 913 | *Vachellia caven+Celtis ehrenbergiana+Condalia buxifolia* |  |  |  |  |  | 1 |  |  | 1 |
| 914 | *Vachellia caven+Celtis ehrenbergiana+Prosopis flexuosa* |  |  |  |  |  | 1 |  |  | 1 |
| 915 | *Vachellia caven+Condalia microphylla* |  |  |  |  |  | 1 |  |  | 1 |
| 916 | *Vachellia caven+Geoffroea decorticans* |  |  | 2 |  |  |  |  |  | 2 |
| 917 | *Vachellia caven+Lithraea molleoides* |  |  |  |  |  | 3 |  |  | 3 |
| 918 | *Vachellia caven+Myrcianthes cisplatensis* |  |  | 1 |  |  |  |  |  | 1 |
| 919 | *Vachellia caven+Myrcianthes cisplatensis+Scutia buxifolia* |  |  | 1 |  |  |  |  |  | 1 |
| 920 | *Vachellia caven+Prosopis affinis* |  |  | 5 |  |  |  |  |  | 5 |
| 921 | *Vachellia caven+Prosopis affinis+Prosopis nigra* |  |  | 1 |  |  |  |  |  | 1 |
| 922 | *Vachellia caven+Prosopis nigra* |  |  | 1 |  |  | 1 |  |  | 2 |
| 923 | *Vachellia caven+Prosopis nigra+Geoffroea decorticans* |  |  | 1 |  |  |  |  |  | 1 |
| 924 | *Vachellia caven+Prosopis nigra+Schinus longifolius+Prosopis affinis* |  |  | 1 |  |  |  |  |  | 1 |
| 925 | *Vachellia caven+Sapium haematospermum* |  |  | 1 |  |  |  |  |  | 1 |
| 926 | *Vachellia caven+Sarcomphalus mistol+Pterogyne nitens+Prosopis elata* |  |  |  |  |  | 1 |  |  | 1 |
| 927 | *Vachellia caven+Schinus gracilipes* |  |  |  |  |  | 1 |  |  | 1 |
| 928 | *Vachellia caven+Schinus longifolius* |  |  | 1 |  |  |  |  |  | 1 |
| 929 | *Vachellia caven+Schinus longifolius+Myrcianthes cisplatensis* |  |  | 1 |  |  |  |  |  | 1 |
| 930 | *Vachellia caven+Tabebuia nodosa* |  |  |  |  |  | 2 |  |  | 2 |
| 931 | *Vachellia caven+Zanthoxylum petiolare+Schinus longifolius+Schinopsis balansae* |  |  |  |  |  | 1 |  |  | 1 |
| 932 | *Vallesia glabra+Prosopis alba* |  |  |  |  |  | 1 |  |  | 1 |
| ***Moraceae + others*** | |  |  |  |  |  |  |  |  |  |
| 933 | *Ficus luschnathiana+Nectandra angustifolia+Luehea divaricata* |  |  |  |  |  | 1 |  |  | 1 |
| 934 | *Ficus luschnathiana+Ruprechtia laxiflora+Myrcianthes pungens* |  |  |  |  |  | 1 |  |  | 1 |
| 935 | *Ficus luschnathiana+Schinopsis balansae+Achatocarpus praecox+Cynophalla flexuosa* |  |  |  |  |  | 1 |  |  | 1 |
| 936 | *Ficus maroma+Terminalia triflora+Cedrela balansae+Miconia molybdaea* |  |  |  |  |  |  |  | 1 | 1 |
| 937 | *Ficus maroma+Tipuana tipu+Cordia trichotoma* |  |  |  |  |  |  |  | 1 | 1 |
| 938 | *Maclura tinctoria* |  |  |  |  |  |  |  | 1 | 1 |
| 939 | *Maclura tinctoria+Handroanthus impetiginosus+Anadenanthera colubrina* |  |  |  |  |  |  |  | 1 | 1 |
| 940 | *Maclura tinctoria+Pisonia zapallo+Prosopis alba* |  |  |  |  |  | 1 |  |  | 1 |
| 941 | *Maclura tinctoria+Sideroxylon obtusifolium+Diplokeleba floribunda* |  |  |  |  |  | 1 |  |  | 1 |
| 942 | *Morus insignis* |  |  |  |  |  | 1 |  |  | 1 |
| 943 | *Morus insignis+Solanum riparium* |  |  |  |  |  | 1 |  |  | 1 |
| ***Myrtaceae + others*** | |  |  |  |  |  |  |  |  |  |
| 944 | *Blepharocalyx salicifolius+Allophylus edulis* |  |  |  |  |  |  |  | 2 | 2 |
| 945 | *Blepharocalyx salicifolius+Myrcianthes mato* |  |  |  |  |  |  |  | 1 | 1 |
| 946 | *Blepharocalyx salicifolius+Parapiptadenia excelsa+Condalia buxifolia* |  |  |  |  |  |  |  | 1 | 1 |
| 947 | *Boehmeria caudata+Pisonia zapallo+Ocotea puberula* |  |  |  |  |  |  |  | 1 | 1 |
| 948 | *Condalia buxifolia+Blepharocalyx salicifolius* |  |  |  |  |  |  |  | 1 | 1 |
| 949 | *Eugenia mattosii+Blepharocalyx salicifolius* |  |  |  |  |  |  |  | 1 | 1 |
| 950 | *Eugenia myrcianthes+Handroanthus heptaphyllus+Sorocea sprucei* |  |  |  |  |  | 1 |  |  | 1 |
| 951 | *Eugenia myrcianthes+Sebastiania commersoniana* |  |  | 1 |  |  |  |  |  | 1 |
| 952 | *Eugenia speciosa+Ruprechtia laxiflora+Guazuma ulmifolia+Ocotea puberula* |  |  |  |  |  | 1 |  |  | 1 |
| 953 | *Eugenia uniflora+Condalia buxifolia* |  |  |  |  |  |  |  | 1 | 1 |
| 954 | *Eugenia uniflora+Ruprechtia laxiflora+Cordia americana* |  |  |  |  |  | 1 |  |  | 1 |
| 955 | *Eugenia uniflora+Schinopsis balansae+Myrcianthes cisplatensis* |  |  | 1 |  |  |  |  |  | 1 |
| 956 | *Gomidesia barituensis+Ilex argentina+Siphoneugena occidentalis* |  |  |  |  |  |  |  | 1 | 1 |
| 957 | *Ilex argentina+Myrcianthes mato+Juglans australis+Myrcianthes pseudomato* |  |  |  |  |  |  |  | 1 | 1 |
| 958 | *Juglans australis+Allophylus edulis* |  |  |  |  |  |  |  | 1 | 1 |
| 959 | *Juglans australis+Cedrela angustifolia* |  |  |  |  |  |  |  | 1 | 1 |
| 960 | *Juglans australis+Handroanthus lapacho* |  |  |  |  |  |  |  | 1 | 1 |
| 961 | *Juglans australis+Ilex argentina+Podocarpus parlatorei+Blepharocalyx salicifolius* |  |  |  |  |  |  |  | 1 | 1 |
| 962 | *Juglans australis+Juglans regia* |  |  |  |  |  |  |  | 1 | 1 |
| 963 | *Juglans australis+Myrcianthes cisplatensis+Blepharocalyx salicifolius* |  |  |  |  |  | 1 |  |  | 1 |
| 964 | *Juglans australis+Myrcianthes pungens+Podocarpus parlatorei* |  |  |  |  |  |  |  | 1 | 1 |
| 965 | *Juglans australis+Myroxylon peruiferum+Podocarpus parlatorei* |  |  |  |  |  |  |  | 1 | 1 |
| 966 | *Myrcianthes cisplatensis* |  |  |  |  |  | 1 |  |  | 1 |
| 967 | *Myrcianthes cisplatensis+Phyllostylon rhamnoides+Ruprechtia laxiflora* |  |  |  |  |  | 1 |  |  | 1 |
| 968 | *Myrcianthes cisplatensis+Prosopis affinis* |  |  | 1 |  |  |  |  |  | 1 |
| 969 | *Myrcianthes cisplatensis+Prosopis nigra* |  |  | 2 |  |  | 1 |  |  | 3 |
| 970 | *Myrcianthes cisplatensis+Prosopis nigra+Sideroxylon obtusifolium* |  |  | 1 |  |  |  |  |  | 1 |
| 971 | *Myrcianthes cisplatensis+Ruprechtia laxiflora+Nectandra angustifolia+Nectandra angusta* |  |  | 1 |  |  |  |  |  | 1 |
| 972 | *Myrcianthes cisplatensis+Sebastiania commersoniana* |  |  | 1 |  |  |  |  |  | 1 |
| 973 | *Myrcianthes cisplatensis+Senegalia praecox+Tabebuia nodosa* |  |  |  |  |  | 1 |  |  | 1 |
| 974 | *Myrcianthes cisplatensis+Vachellia caven+Celtis ehrenbergiana* |  |  | 1 |  |  |  |  |  | 1 |
| 975 | *Myrcianthes cisplatensis+Zanthoxylum fagara* |  |  | 1 |  |  |  |  |  | 1 |
| 976 | *Myrcianthes mato+Celtis iguanaea+Handroanthus impetiginosus* |  |  |  |  |  | 1 |  |  | 1 |
| 977 | *Myrcianthes pungens* |  |  | 1 |  |  |  |  |  | 1 |
| 978 | *Myrcianthes pungens+Anadenanthera colubrina* |  |  |  |  |  |  |  | 1 | 1 |
| 979 | *Myrcianthes pungens+Citharexylum joergensenii+Schinopsis lorentzii* |  |  |  |  |  |  |  | 1 | 1 |
| 980 | *Myrcianthes pungens+Cupania vernalis+Diatenopteryx sorbifolia* |  |  |  |  |  |  |  | 1 | 1 |
| 981 | *Myrcianthes pungens+Juglans australis+Podocarpus parlatorei* |  |  |  |  |  |  |  | 1 | 1 |
| 982 | *Myrcianthes pungens+Ocotea porphyria+Gleditsia amorphoides* |  |  |  |  |  |  |  | 1 | 1 |
| 983 | *Myrcianthes pungens+Ocotea puberula* |  |  |  |  |  |  |  | 1 | 1 |
| 984 | *Myrcianthes pungens+Ruprechtia laxiflora+Urera caracasana+Ocotea puberula* |  |  |  |  |  |  |  | 1 | 1 |
| 985 | *Myrcianthes pungens+Scutia buxifolia* |  |  | 1 |  |  |  |  |  | 1 |
| 986 | *Myrcianthes pungens+Scutia buxifolia+Ceiba chodatii* |  |  |  |  |  |  |  | 1 | 1 |
| 987 | *Myrsine laetevirens+Parapiptadenia excelsa+Juglans australis* |  |  |  |  |  |  |  | 1 | 1 |
| 988 | *Phytolacca dioica+Eugenia uniflora* |  |  |  |  |  | 1 |  |  | 1 |
| 989 | *Pouteria salicifolia+Eugenia myrcianthes* |  |  | 1 |  |  |  |  |  | 1 |
| 990 | *Rhamnus sphaerosperma+Cedrela angustifolia+Parapiptadenia excelsa+Handroanthus lapacho* |  |  |  |  |  |  |  | 1 | 1 |
| 991 | *Rhamnus sphaerosperma+Ocotea porphyria+Handroanthus ochraceus* |  |  |  |  |  |  |  | 1 | 1 |
| 992 | *Ruprechtia laxiflora+Blepharocalyx salicifolius+Vassobia breviflora+Phyllostylon rhamnoides* |  |  |  |  |  |  |  | 1 | 1 |
| 993 | *Scutia buxifolia* |  |  |  |  |  |  |  | 1 | 1 |
| 994 | *Scutia buxifolia+Anadenanthera colubrina* |  |  |  |  |  |  |  | 1 | 1 |
| 995 | *Scutia buxifolia+Myrcianthes cisplatensis+Prosopis affinis* |  |  | 1 |  |  |  |  |  | 1 |
| 996 | *Scutia buxifolia+Myrcianthes cisplatensis+Prosopis nigra* |  |  | 1 |  |  |  |  |  | 1 |
| 997 | *Siphoneugena occidentalis+Cedrela angustifolia+Luehea divaricata* |  |  |  |  |  |  |  | 1 | 1 |
| 998 | *Sorocea sprucei+Myrsine laetevirens+Myrcianthes cisplatensis* |  |  |  |  |  | 1 |  |  | 1 |
| 999 | *Urera baccifera+Handroanthus impetiginosus+Chrysophyllum gonocarpum* |  |  |  |  |  |  |  | 1 | 1 |
| 1000 | *Zanthoxylum rhoifolium+Phytolacca dioica+Myrsine laetevirens* |  |  | 1 |  |  |  |  |  | 1 |
| ***Nothofagus antarctica + others*** | |  |  |  |  |  |  |  |  |  |
| 1001 | *Araucaria araucana* | 1 |  |  |  |  |  |  |  | 1 |
| 1002 | *Maytenus boaria+Lomatia hirsuta* | 1 |  |  |  |  |  |  |  | 1 |
| 1003 | *Nothofagus alpina* | 1 |  |  |  |  |  |  |  | 1 |
| 1004 | *Nothofagus antarctica* | 46 |  |  |  |  |  |  |  | 46 |
| 1005 | *Nothofagus antarctica+Araucaria araucana* | 1 |  |  |  |  |  |  |  | 1 |
| 1006 | *Nothofagus antarctica+Austrocedrus chilensis* | 1 |  |  |  |  |  |  |  | 1 |
| 1007 | *Nothofagus antarctica+Embothrium coccineum* | 1 |  |  |  |  |  |  |  | 1 |
| 1008 | *Nothofagus antarctica+Lomatia hirsuta* | 2 |  |  |  |  |  |  |  | 2 |
| ***Nothofagus betuloides + others*** | |  |  |  |  |  |  |  |  |  |
| 1009 | *Nothofagus betuloides* | 8 |  |  |  |  |  |  |  | 8 |
| 1010 | *Nothofagus betuloides+Nothofagus pumilio* | 2 |  |  |  |  |  |  |  | 2 |
| ***Nothofagus dombeyi + others*** | |  |  |  |  |  |  |  |  |  |
| 1011 | *Lomatia hirsuta* | 2 |  |  |  |  |  |  |  | 2 |
| 1012 | *Nothofagus alpina+Nothofagus dombeyi* | 1 |  |  |  |  |  |  |  | 1 |
| 1013 | *Nothofagus dombeyi* | 16 |  |  |  |  |  |  |  | 16 |
| 1014 | *Nothofagus dombeyi+Austrocedrus chilensis* | 2 |  |  |  |  |  |  |  | 2 |
| 1015 | *Nothofagus dombeyi+Lomatia hirsuta* | 1 |  |  |  |  |  |  |  | 1 |
| 1016 | *Nothofagus dombeyi+Maytenus boaria+Lomatia hirsuta* | 1 |  |  |  |  |  |  |  | 1 |
| 1017 | *Nothofagus dombeyi+Nothofagus pumilio* | 1 |  |  |  |  |  |  |  | 1 |
| ***Nothofagus pumilio + others*** | |  |  |  |  |  |  |  |  |  |
| 1018 | *Araucaria araucana+Nothofagus pumilio* | 1 |  |  |  |  |  |  |  | 1 |
| 1019 | *Nothofagus alpina+Nothofagus pumilio* | 1 |  |  |  |  |  |  |  | 1 |
| 1020 | *Nothofagus pumilio* | 129 |  |  |  |  |  |  |  | 129 |
| 1021 | *Nothofagus pumilio+Araucaria araucana* | 2 |  |  |  |  |  |  |  | 2 |
| 1022 | *Nothofagus pumilio+Nothofagus antarctica* | 2 |  |  |  |  |  |  |  | 2 |
| ***Palmera + others*** | |  |  |  |  |  |  |  |  |  |
| 1023 | *Butia yatay* |  |  |  |  |  | 1 |  |  | 1 |
| 1024 | *Casearia sylvestris+Syagrus romanzoffiana+Machaerium stipitatum* |  |  |  |  |  |  | 1 |  | 1 |
| 1025 | *Copernicia alba* |  |  | 2 |  |  | 50 |  |  | 52 |
| 1026 | *Copernicia alba+Aspidosperma quebracho-blanco+Diplokeleba floribunda* |  |  |  |  |  | 1 |  |  | 1 |
| 1027 | *Copernicia alba+Celtis ehrenbergiana* |  |  |  |  |  | 1 |  |  | 1 |
| 1028 | *Copernicia alba+Chrysophyllum marginatum+Gleditsia amorphoides* |  |  |  |  |  | 1 |  |  | 1 |
| 1029 | *Copernicia alba+Cynophalla retusa+Prosopis ruscifolia* |  |  |  |  |  | 1 |  |  | 1 |
| 1030 | *Copernicia alba+Diplokeleba floribunda+Schinopsis balansae+Myracrodruon balansae* |  |  |  |  |  | 1 |  |  | 1 |
| 1031 | *Copernicia alba+Enterolobium contortisiliquum* |  |  |  |  |  | 1 |  |  | 1 |
| 1032 | *Copernicia alba+Prosopis affinis* |  |  |  |  |  | 1 |  |  | 1 |
| 1033 | *Copernicia alba+Prosopis affinis+Prosopis nigra* |  |  |  |  |  | 1 |  |  | 1 |
| 1034 | *Copernicia alba+Prosopis alba+Tabebuia nodosa* |  |  |  |  |  | 1 |  |  | 1 |
| 1035 | *Copernicia alba+Prosopis nigra* |  |  |  |  |  | 7 |  |  | 7 |
| 1036 | *Copernicia alba+Prosopis nigra+Schinopsis balansae* |  |  |  |  |  | 1 |  |  | 1 |
| 1037 | *Copernicia alba+Prosopis nigra+Sideroxylon obtusifolium* |  |  |  |  |  | 1 |  |  | 1 |
| 1038 | *Copernicia alba+Prosopis nigra+Tabebuia nodosa* |  |  |  |  |  | 1 |  |  | 1 |
| 1039 | *Copernicia alba+Prosopis ruscifolia* |  |  |  |  |  | 1 |  |  | 1 |
| 1040 | *Copernicia alba+Prosopis ruscifolia+Cynophalla retusa* |  |  |  |  |  | 1 |  |  | 1 |
| 1041 | *Copernicia alba+Sarcomphalus mistol+Cynophalla retusa* |  |  |  |  |  | 1 |  |  | 1 |
| 1042 | *Copernicia alba+Tabebuia nodosa* |  |  |  |  |  | 6 |  |  | 6 |
| 1043 | *Copernicia alba+Tabebuia nodosa+Prosopis nigra* |  |  |  |  |  | 1 |  |  | 1 |
| 1044 | *Copernicia alba+Tabebuia nodosa+Sarcomphalus mistol* |  |  |  |  |  | 1 |  |  | 1 |
| 1045 | *Copernicia alba+Tabebuia nodosa+Trithrinax schizophylla var. biflabellata* |  |  |  |  |  | 1 |  |  | 1 |
| 1046 | *Euterpe edulis+Peltophorum dubium+Jacaratia spinosa* |  |  |  |  |  |  | 1 |  | 1 |
| 1047 | *Syagrus romanzoffiana+Diatenopteryx sorbifolia+Balfourodendron riedelianum+Sebastiania commersoniana* |  |  |  |  |  |  | 1 |  | 1 |
| 1048 | *Syagrus romanzoffiana+Myrcianthes pungens+Chrysophyllum gonocarpum+Chrysophyllum marginatum* |  |  |  |  |  |  | 1 |  | 1 |
| 1049 | *Trithrinax campestris+Geoffroea decorticans* |  |  |  |  |  | 1 |  |  | 1 |
| 1050 | *Trithrinax campestris+Prosopis affinis* |  |  | 1 |  |  |  |  |  | 1 |
| 1051 | *Trithrinax campestris+Prosopis affinis+Aspidosperma quebracho-blanco+Senegalia bonariensis* |  |  | 1 |  |  |  |  |  | 1 |
| 1052 | *Trithrinax campestris+Prosopis kuntzei+Sarcomphalus mistol* |  |  |  |  |  | 1 |  |  | 1 |
| 1053 | *Trithrinax campestris+Prosopis nigra* |  |  | 4 |  |  |  |  |  | 4 |
| 1054 | *Trithrinax campestris+Senegalia praecox+Aspidosperma quebracho-blanco* |  |  |  |  |  | 1 |  |  | 1 |
| 1055 | *Trithrinax campestris+Senegalia praecox+Schinopsis lorentzii* |  |  |  |  |  | 1 |  |  | 1 |
| 1056 | *Trithrinax campestris+Sideroxylon obtusifolium* |  |  | 1 |  |  |  |  |  | 1 |
| 1057 | *Trithrinax campestris+Vachellia caven* |  |  | 1 |  |  |  |  |  | 1 |
| 1058 | *Trithrinax campestris+Vachellia caven+Prosopis nigra* |  |  | 1 |  |  |  |  |  | 1 |
| 1059 | *Trithrinax schizophylla var. biflabellata* |  |  |  |  |  | 1 |  |  | 1 |
| 1060 | *Trithrinax schizophylla var. biflabellata+Salta triflora+Sideroxylon obtusifolium+Cordia americana* |  |  |  |  |  | 1 |  |  | 1 |
| 1061 | *Trithrinax schizophylla var. biflabellata+Sarcomphalus mistol+Aspidosperma quebracho-blanco* |  |  |  |  |  | 1 |  |  | 1 |
| 1062 | *Trithrinax schizophylla var. biflabellata+Sarcomphalus mistol+Prosopis ruscifolia* |  |  |  |  |  | 1 |  |  | 1 |
| 1063 | *Trithrinax schizophylla var. biflabellata+Schinopsis lorentzii+Aspidosperma quebracho-blanco* |  |  |  |  |  | 1 |  |  | 1 |
| 1064 | *Trithrinax schyzophylla var. schyzophylla+Prosopis nigra* |  |  |  |  |  | 1 |  |  | 1 |
| 1065 | *Trithrinax schyzophylla var. schyzophylla+Sarcomphalus mistol* |  |  |  |  |  | 1 |  |  | 1 |
| 1066 | *Trithrinax schyzophylla var. schyzophylla+Sarcomphalus mistol+Prosopis kuntzei* |  |  |  |  |  | 1 |  |  | 1 |
| 1067 | *Trithrinax schyzophylla var. schyzophylla+Sarcomphalus mistol+Schinopsis lorentzii* |  |  |  |  |  | 1 |  |  | 1 |
| ***Papilionoideae + others*** | |  |  |  |  |  |  |  |  |  |
| 1068 | *Aspidosperma polyneuron+Muellera campestris+Chrysophyllum gonocarpum* |  |  |  |  |  |  | 1 |  | 1 |
| 1069 | *Ateleia glazioveana* |  |  |  |  |  |  | 1 |  | 1 |
| 1070 | *Ateleia glazioveana+Bougainvillea stipitata+Achatocarpus praecox* |  |  |  |  |  | 1 |  |  | 1 |
| 1071 | *Ateleia glazioveana+Ocotea puberula+Casearia decandra* |  |  |  |  |  |  | 1 |  | 1 |
| 1072 | *Erythrina falcata+Enterolobium contortisiliquum+Matayba elaeagnoides* |  |  |  |  |  |  | 1 |  | 1 |
| 1073 | *Erythrina falcata+Muellera campestris* |  |  |  |  |  |  | 1 |  | 1 |
| 1074 | *Machaerium stipitatum+Bastardiopsis densiflora+Nectandra angustifolia* |  |  |  |  |  |  | 1 |  | 1 |
| 1075 | *Machaerium stipitatum+Citronella paniculata+Gleditsia amorphoides+Chrysophyllum gonocarpum* |  |  |  |  |  |  | 1 |  | 1 |
| 1076 | *Machaerium stipitatum+Nectandra angustifolia+Muellera campestris* |  |  |  |  |  |  | 1 |  | 1 |
| 1077 | *Machaerium stipitatum+Nectandra angustifolia+Muellera campestris+Myrocarpus frondosus* |  |  |  |  |  |  | 1 |  | 1 |
| 1078 | *Muellera campestris+Apuleia leiocarpa+Plinia rivularis* |  |  |  |  |  |  | 1 |  | 1 |
| 1079 | *Muellera campestris+Cordia americana+Luehea divaricata* |  |  |  |  |  |  | 1 |  | 1 |
| 1080 | *Muellera campestris+Luehea divaricata+Nectandra angustifolia* |  |  |  |  |  |  | 1 |  | 1 |
| 1081 | *Muellera campestris+Nectandra angustifolia+Prunus brasiliensis+Sebastiania commersoniana* |  |  |  |  |  |  | 1 |  | 1 |
| 1082 | *Muellera campestris+Syagrus romanzoffiana* |  |  |  |  |  |  | 1 |  | 1 |
| 1083 | *Sebastiania commersoniana+Muellera campestris+Nectandra angustifolia* |  |  |  |  |  |  | 1 |  | 1 |
| 1084 | *Tipuana tipu* |  |  |  |  |  |  |  | 1 | 1 |
| 1085 | *Tipuana tipu+Acanthosyris falcata+Copernicia alba+Vachellia aroma* |  |  |  |  |  | 1 |  |  | 1 |
| 1086 | *Tipuana tipu+Anadenanthera colubrina+Parasenegalia visco+Diatenopteryx sorbifolia* |  |  |  |  |  |  |  | 1 | 1 |
| ***Phyllostylon rhamnoides + others*** | |  |  |  |  |  |  |  |  |  |
| 1087 | *Aspidosperma quebracho-blanco+Phyllostylon rhamnoides+Calycophyllum multiflorum* |  |  |  |  |  |  |  | 1 | 1 |
| 1088 | *Heliocarpus popayanensis+Phyllostylon rhamnoides+Pisonia zapallo* |  |  |  |  |  |  |  | 1 | 1 |
| 1089 | *Myracrodruon urundeuva+Phyllostylon rhamnoides+Anadenanthera colubrina* |  |  |  |  |  |  |  | 1 | 1 |
| 1090 | *Phyllostylon rhamnoides* |  |  |  |  |  | 1 |  | 1 | 2 |
| 1091 | *Phyllostylon rhamnoides+Anadenanthera colubrina* |  |  |  |  |  |  |  | 5 | 5 |
| 1092 | *Phyllostylon rhamnoides+Anadenanthera colubrina+Diatenopteryx sorbifolia* |  |  |  |  |  |  |  | 1 | 1 |
| 1093 | *Phyllostylon rhamnoides+Anadenanthera colubrina+Myrcianthes mato* |  |  |  |  |  |  |  | 1 | 1 |
| 1094 | *Phyllostylon rhamnoides+Anadenanthera colubrina+Ruprechtia apetala* |  |  |  |  |  |  |  | 1 | 1 |
| 1095 | *Phyllostylon rhamnoides+Calycophyllum multiflorum+Athyana weinmanniifolia+Myroxylon peruiferum* |  |  |  |  |  |  |  | 1 | 1 |
| 1096 | *Phyllostylon rhamnoides+Cedrela balansae+Pisonia zapallo* |  |  |  |  |  |  |  | 1 | 1 |
| 1097 | *Phyllostylon rhamnoides+Ceiba chodatii* |  |  |  |  |  |  |  | 1 | 1 |
| 1098 | *Phyllostylon rhamnoides+Celtis ehrenbergiana+Cordia americana* |  |  |  |  |  | 1 |  |  | 1 |
| 1099 | *Phyllostylon rhamnoides+Cordia americana+Gleditsia amorphoides* |  |  |  |  |  | 1 |  |  | 1 |
| 1100 | *Phyllostylon rhamnoides+Cordia americana+Gleditsia amorphoides+Eugenia uniflora* |  |  |  |  |  | 1 |  |  | 1 |
| 1101 | *Phyllostylon rhamnoides+Cordia americana+Senegalia praecox* |  |  |  |  |  |  |  | 1 | 1 |
| 1102 | *Phyllostylon rhamnoides+Eugenia punicifolia+Pisonia zapallo* |  |  |  |  |  | 1 |  |  | 1 |
| 1103 | *Phyllostylon rhamnoides+Gleditsia amorphoides+Condalia buxifolia+Zanthoxylum coco* |  |  |  |  |  |  |  | 1 | 1 |
| 1104 | *Phyllostylon rhamnoides+Gleditsia amorphoides+Diplokeleba floribunda* |  |  |  |  |  | 1 |  |  | 1 |
| 1105 | *Phyllostylon rhamnoides+Gleditsia amorphoides+Ruprechtia laxiflora* |  |  |  |  |  | 1 |  |  | 1 |
| 1106 | *Phyllostylon rhamnoides+Gleditsia amorphoides+Scutia buxifolia* |  |  |  |  |  | 1 |  |  | 1 |
| 1107 | *Phyllostylon rhamnoides+Handroanthus lapacho+Anadenanthera colubrina* |  |  |  |  |  |  |  | 1 | 1 |
| 1108 | *Phyllostylon rhamnoides+Holocalyx balansae+Ficus luschnathiana* |  |  |  |  |  | 1 |  |  | 1 |
| 1109 | *Phyllostylon rhamnoides+Libidibia paraguariensis+Schinopsis balansae* |  |  |  |  |  | 1 |  |  | 1 |
| 1110 | *Phyllostylon rhamnoides+Myracrodruon balansae+Cordia americana* |  |  |  |  |  | 1 |  |  | 1 |
| 1111 | *Phyllostylon rhamnoides+Myracrodruon balansae+Gleditsia amorphoides* |  |  |  |  |  | 1 |  |  | 1 |
| 1112 | *Phyllostylon rhamnoides+Myrcianthes pungens+Eugenia uniflora* |  |  |  |  |  |  |  | 1 | 1 |
| 1113 | *Phyllostylon rhamnoides+Parapiptadenia excelsa+Calycophyllum multiflorum* |  |  |  |  |  |  |  | 1 | 1 |
| 1114 | *Phyllostylon rhamnoides+Pisonia zapallo+Libidibia paraguariensis* |  |  |  |  |  |  |  | 1 | 1 |
| 1115 | *Phyllostylon rhamnoides+Pisonia zapallo+Senegalia praecox+Gleditsia amorphoides* |  |  |  |  |  | 1 |  |  | 1 |
| 1116 | *Phyllostylon rhamnoides+Ruprechtia laxiflora+Cordia americana* |  |  |  |  |  | 1 |  |  | 1 |
| 1117 | *Phyllostylon rhamnoides+Salta triflora+Senegalia praecox* |  |  |  |  |  | 1 |  |  | 1 |
| 1118 | *Phyllostylon rhamnoides+Senegalia praecox+Salta triflora+Diplokeleba floribunda* |  |  |  |  |  | 1 |  |  | 1 |
| 1119 | *Phyllostylon rhamnoides+Sideroxylon obtusifolium+Ceiba chodatii* |  |  |  |  |  | 1 |  |  | 1 |
| ***Pisonia zapallo + others*** | |  |  |  |  |  |  |  |  |  |
| 1120 | *Pisonia zapallo* |  |  |  |  |  | 1 |  |  | 1 |
| 1121 | *Pisonia zapallo+Albizia inundata* |  |  |  |  |  | 1 |  |  | 1 |
| 1122 | *Pisonia zapallo+Aspidosperma quebracho-blanco+Bougainvillea stipitata* |  |  |  |  |  | 1 |  |  | 1 |
| 1123 | *Pisonia zapallo+Aspidosperma quebracho-blanco+Ceiba chodatii* |  |  |  |  |  | 1 |  |  | 1 |
| 1124 | *Pisonia zapallo+Cordia americana+Gleditsia amorphoides+Libidibia paraguariensis* |  |  |  |  |  | 1 |  |  | 1 |
| 1125 | *Pisonia zapallo+Cordia americana+Ruprechtia laxiflora* |  |  |  |  |  | 1 |  |  | 1 |
| 1126 | *Pisonia zapallo+Eugenia uniflora+Parapiptadenia excelsa* |  |  |  |  |  |  |  | 1 | 1 |
| 1127 | *Pisonia zapallo+Gleditsia amorphoides+Handroanthus impetiginosus+Sideroxylon obtusifolium* |  |  |  |  |  | 1 |  |  | 1 |
| 1128 | *Pisonia zapallo+Myroxylon peruiferum+Terminalia triflora* |  |  |  |  |  |  |  | 1 | 1 |
| 1129 | *Pisonia zapallo+Ocotea porphyria+Juglans australis* |  |  |  |  |  |  |  | 1 | 1 |
| 1130 | *Pisonia zapallo+Parapiptadenia excelsa+Erythroxylum argentinum* |  |  |  |  |  |  |  | 1 | 1 |
| 1131 | *Pisonia zapallo+Phyllostylon rhamnoides* |  |  |  |  |  |  |  | 1 | 1 |
| 1132 | *Pisonia zapallo+Phyllostylon rhamnoides+Zanthoxylum coco* |  |  |  |  |  |  |  | 1 | 1 |
| 1133 | *Pisonia zapallo+Prosopis kuntzei* |  |  |  |  |  | 1 |  |  | 1 |
| 1134 | *Pisonia zapallo+Salta triflora+Sarcomphalus mistol* |  |  |  |  |  | 1 |  |  | 1 |
| 1135 | *Pisonia zapallo+Sarcomphalus mistol+Cynophalla retusa+Prosopis kuntzei* |  |  |  |  |  | 1 |  |  | 1 |
| 1136 | *Pisonia zapallo+Sarcomphalus mistol+Salta triflora* |  |  |  |  |  | 1 |  |  | 1 |
| 1137 | *Pisonia zapallo+Schinopsis balansae+Prosopis nigra* |  |  |  |  |  | 1 |  |  | 1 |
| 1138 | *Pisonia zapallo+Schinopsis lorentzii+Parapiptadenia excelsa* |  |  |  |  |  |  |  | 1 | 1 |
| 1139 | *Pisonia zapallo+Senegalia praecox+Prosopis alba* |  |  |  |  |  | 1 |  |  | 1 |
| 1140 | *Pisonia zapallo+Senegalia praecox+Prosopis kuntzei+Sideroxylon obtusifolium* |  |  |  |  |  | 1 |  |  | 1 |
| 1141 | *Pisonia zapallo+Senegalia praecox+Schinopsis lorentzii* |  |  |  |  |  | 1 |  |  | 1 |
| 1142 | *Pisonia zapallo+Sideroxylon obtusifolium+Cynophalla retusa+Prosopis alba* |  |  |  |  |  | 1 |  |  | 1 |
| 1143 | *Pisonia zapallo+Tabebuia nodosa+Senegalia praecox* |  |  |  |  |  | 1 |  |  | 1 |
| ***Podocarpus parlatorei + others*** | |  |  |  |  |  |  |  |  |  |
| 1144 | *Podocarpus parlatorei* |  |  |  |  |  |  |  | 7 | 7 |
| 1145 | *Podocarpus parlatorei+Azara salicifolia+Cedrela balansae* |  |  |  |  |  |  |  | 1 | 1 |
| 1146 | *Podocarpus parlatorei+Blepharocalyx salicifolius* |  |  |  |  |  |  |  | 1 | 1 |
| 1147 | *Podocarpus parlatorei+Juglans australis* |  |  |  |  |  |  |  | 1 | 1 |
| 1148 | *Podocarpus parlatorei+Juglans australis+Eugenia uniflora+Erythrina falcata* |  |  |  |  |  |  |  | 1 | 1 |
| 1149 | *Podocarpus parlatorei+Juglans australis+Myrcianthes mato+Prunus tucumanensis* |  |  |  |  |  |  |  | 1 | 1 |
| 1150 | *Podocarpus parlatorei+Myrrhinium atropurpureum* |  |  |  |  |  |  |  | 1 | 1 |
| 1151 | *Podocarpus parlatorei+Schinus myrtifolius+Schinus gracilipes* |  |  |  |  |  |  |  | 1 | 1 |
| 1152 | *Prunus tucumanensis+Podocarpus parlatorei* |  |  |  |  |  |  |  | 1 | 1 |
| ***Polygonaceae + others*** | |  |  |  |  |  |  |  |  |  |
| 1153 | *Bougainvillea praecox+Salta triflora+Celtis chichape* |  |  |  |  |  | 1 |  |  | 1 |
| 1154 | *Kageneckia lanceolata+Blepharocalyx salicifolius+Ruprechtia apetala* |  |  |  |  |  | 1 |  |  | 1 |
| 1155 | *Libidibia paraguariensis+Schinus piliferus+Salta triflora* |  |  |  |  |  |  |  | 1 | 1 |
| 1156 | *Maytenus vitis-idaea+Ruprechtia apetala+Senegalia praecox* |  |  |  |  |  | 1 |  |  | 1 |
| 1157 | *Ruprechtia apetala+Anadenanthera colubrina* |  |  |  |  |  |  |  | 1 | 1 |
| 1158 | *Ruprechtia apetala+Aspidosperma quebracho-blanco+Prosopis nigra+Schinus fasciculatus* |  |  |  |  |  | 1 |  |  | 1 |
| 1159 | *Ruprechtia apetala+Aspidosperma quebracho-blanco+Schinopsis lorentzii+Sarcomphalus mistol* |  |  |  |  |  | 1 |  |  | 1 |
| 1160 | *Ruprechtia apetala+Cedrela balansae+Cordia americana* |  |  |  |  |  |  |  | 1 | 1 |
| 1161 | *Ruprechtia apetala+Celtis ehrenbergiana+Vachellia caven* |  |  |  |  |  | 1 |  |  | 1 |
| 1162 | *Ruprechtia apetala+Geoffroea decorticans+Gleditsia amorphoides* |  |  |  |  |  |  |  | 1 | 1 |
| 1163 | *Ruprechtia apetala+Lycium cestroides+Aspidosperma quebracho-blanco* |  |  |  |  |  | 1 |  |  | 1 |
| 1164 | *Ruprechtia apetala+Myracrodruon urundeuva* |  |  |  |  |  |  |  | 1 | 1 |
| 1165 | *Ruprechtia apetala+Parapiptadenia excelsa+Celtis chichape* |  |  |  |  |  |  |  | 1 | 1 |
| 1166 | *Ruprechtia apetala+Prosopis alba+Allophylus edulis+Condalia buxifolia* |  |  |  |  |  | 1 |  |  | 1 |
| 1167 | *Ruprechtia apetala+Sarcomphalus mistol+Tabebuia nodosa* |  |  |  |  |  | 1 |  |  | 1 |
| 1168 | *Ruprechtia apetala+Schinopsis lorentzii* |  |  |  |  |  | 1 |  |  | 1 |
| 1169 | *Ruprechtia apetala+Senegalia praecox+Schinopsis lorentzii* |  |  |  |  |  | 1 |  |  | 1 |
| 1170 | *Ruprechtia laxiflora+Achatocarpus praecox+Libidibia paraguariensis* |  |  |  |  |  | 1 |  |  | 1 |
| 1171 | *Ruprechtia laxiflora+Celtis ehrenbergiana* |  | 1 |  |  |  |  |  |  | 1 |
| 1172 | *Ruprechtia laxiflora+Cordia americana* |  |  |  |  |  | 1 |  |  | 1 |
| 1173 | *Ruprechtia laxiflora+Cordia americana+Aspidosperma quebracho-blanco* |  |  |  |  |  | 1 |  |  | 1 |
| 1174 | *Ruprechtia laxiflora+Cordia americana+Libidibia paraguariensis+Senegalia praecox* |  |  |  |  |  | 1 |  |  | 1 |
| 1175 | *Ruprechtia laxiflora+Cordia americana+Myrcianthes cisplatensis* |  |  |  |  |  | 1 |  |  | 1 |
| 1176 | *Ruprechtia laxiflora+Eugenia uniflora+Celtis ehrenbergiana* |  |  |  |  |  | 1 |  |  | 1 |
| 1177 | *Ruprechtia laxiflora+Geoffroea decorticans+Tabebuia nodosa+Vachellia aroma* |  |  |  |  |  | 1 |  |  | 1 |
| 1178 | *Ruprechtia laxiflora+Gleditsia amorphoides* |  |  |  |  |  | 1 |  |  | 1 |
| 1179 | *Ruprechtia laxiflora+Gleditsia amorphoides+Diplokeleba floribunda* |  |  |  |  |  | 1 |  |  | 1 |
| 1180 | *Ruprechtia laxiflora+Gleditsia amorphoides+Sapium haematospermum* |  |  |  |  |  | 1 |  |  | 1 |
| 1181 | *Ruprechtia laxiflora+Libidibia paraguariensis+Cordia americana* |  |  |  |  |  | 1 |  |  | 1 |
| 1182 | *Ruprechtia laxiflora+Libidibia paraguariensis+Gleditsia amorphoides* |  |  |  |  |  | 1 |  |  | 1 |
| 1183 | *Ruprechtia laxiflora+Myracrodruon balansae+Enterolobium contortisiliquum* |  |  |  |  |  | 1 |  |  | 1 |
| 1184 | *Ruprechtia laxiflora+Myrcianthes cisplatensis* |  |  |  |  |  | 1 |  |  | 1 |
| 1185 | *Ruprechtia laxiflora+Myrcianthes cisplatensis+Celtis ehrenbergiana+Vachellia caven* |  | 1 |  |  |  |  |  |  | 1 |
| 1186 | *Ruprechtia laxiflora+Myrcianthes cisplatensis+Copernicia alba* |  |  |  |  |  | 1 |  |  | 1 |
| 1187 | *Ruprechtia laxiflora+Parapiptadenia excelsa+Libidibia paraguariensis* |  |  |  |  |  | 1 |  |  | 1 |
| 1188 | *Ruprechtia laxiflora+Phytolacca dioica+Senegalia praecox* |  |  |  |  |  | 1 |  |  | 1 |
| 1189 | *Ruprechtia laxiflora+Prosopis alba+Phytolacca dioica* |  |  |  |  |  | 1 |  |  | 1 |
| 1190 | *Ruprechtia laxiflora+Schinopsis lorentzii+Sarcomphalus mistol+Salta triflora* |  |  |  |  |  | 1 |  |  | 1 |
| 1191 | *Ruprechtia laxiflora+Schinus longifolius* |  |  |  |  |  | 1 |  |  | 1 |
| 1192 | *Ruprechtia laxiflora+Senegalia praecox* |  |  |  |  |  | 3 |  |  | 3 |
| 1193 | *Ruprechtia laxiflora+Senegalia praecox+Libidibia paraguariensis+Cordia americana* |  |  |  |  |  | 1 |  |  | 1 |
| 1194 | *Ruprechtia laxiflora+Tabebuia nodosa+Geoffroea decorticans+Libidibia paraguariensis* |  |  |  |  |  | 1 |  |  | 1 |
| 1195 | *Salta triflora* |  |  |  |  |  | 3 |  |  | 3 |
| 1196 | *Salta triflora+Agonandra excelsa+Schinopsis lorentzii* |  |  |  |  |  | 1 |  |  | 1 |
| 1197 | *Salta triflora+Anadenanthera colubrina+Ruprechtia apetala+Sarcomphalus mistol* |  |  |  |  |  | 1 |  |  | 1 |
| 1198 | *Salta triflora+Anadenanthera colubrina+Sarcomphalus mistol* |  |  |  |  |  | 1 |  |  | 1 |
| 1199 | *Salta triflora+Anadenanthera colubrina+Sideroxylon obtusifolium* |  |  |  |  |  | 1 |  |  | 1 |
| 1200 | *Salta triflora+Aspidosperma quebracho-blanco* |  |  |  |  |  | 4 |  |  | 4 |
| 1201 | *Salta triflora+Aspidosperma quebracho-blanco+Gonopterodendron sarmientoi* |  |  |  |  |  | 1 |  |  | 1 |
| 1202 | *Salta triflora+Aspidosperma quebracho-blanco+Gonopterodendron sarmientoi+Geoffroea decorticans* |  |  |  |  |  | 1 |  |  | 1 |
| 1203 | *Salta triflora+Aspidosperma quebracho-blanco+Libidibia paraguariensis* |  |  |  |  |  | 1 |  |  | 1 |
| 1204 | *Salta triflora+Aspidosperma quebracho-blanco+Monteverdia spinosa+Sarcomphalus mistol* |  |  |  |  |  | 1 |  |  | 1 |
| 1205 | *Salta triflora+Aspidosperma quebracho-blanco+Sarcomphalus mistol+Schinopsis lorentzii* |  |  |  |  |  | 1 |  |  | 1 |
| 1206 | *Salta triflora+Aspidosperma quebracho-blanco+Sarcomphalus mistol+Ximenia americana* |  |  |  |  |  | 1 |  |  | 1 |
| 1207 | *Salta triflora+Aspidosperma quebracho-blanco+Schinopsis lorentzii* |  |  |  |  |  | 1 |  |  | 1 |
| 1208 | *Salta triflora+Aspidosperma quebracho-blanco+Schinopsis lorentzii+Gonopterodendron sarmientoi* |  |  |  |  |  | 1 |  |  | 1 |
| 1209 | *Salta triflora+Aspidosperma quebracho-blanco+Senegalia gilliesii* |  |  |  |  |  | 1 |  |  | 1 |
| 1210 | *Salta triflora+Aspidosperma quebracho-blanco+Sideroxylon obtusifolium* |  |  |  |  |  | 1 |  |  | 1 |
| 1211 | *Salta triflora+Aspidosperma quebracho-blanco+Tabebuia nodosa* |  |  |  |  |  | 1 |  |  | 1 |
| 1212 | *Salta triflora+Aspidosperma quebracho-blanco+Tabebuia nodosa+Schinopsis lorentzii* |  |  |  |  |  | 1 |  |  | 1 |
| 1213 | *Salta triflora+Calycophyllum multiflorum+Phyllostylon rhamnoides+Pisonia zapallo* |  |  |  |  |  | 1 |  |  | 1 |
| 1214 | *Salta triflora+Gonopterodendron sarmientoi* |  |  |  |  |  | 2 |  |  | 2 |
| 1215 | *Salta triflora+Gonopterodendron sarmientoi+Aspidosperma quebracho-blanco+Sarcomphalus mistol* |  |  |  |  |  | 1 |  |  | 1 |
| 1216 | *Salta triflora+Gonopterodendron sarmientoi+Aspidosperma quebracho-blanco+Tabebuia nodosa* |  |  |  |  |  | 1 |  |  | 1 |
| 1217 | *Salta triflora+Gonopterodendron sarmientoi+Prosopis ruscifolia* |  |  |  |  |  | 1 |  |  | 1 |
| 1218 | *Salta triflora+Gonopterodendron sarmientoi+Sarcomphalus mistol* |  |  |  |  |  | 1 |  |  | 1 |
| 1219 | *Salta triflora+Gonopterodendron sarmientoi+Sarcomphalus mistol+Aspidosperma quebracho-blanco* |  |  |  |  |  | 1 |  |  | 1 |
| 1220 | *Salta triflora+Gonopterodendron sarmientoi+Sarcotoxicum salicifolium* |  |  |  |  |  | 1 |  |  | 1 |
| 1221 | *Salta triflora+Libidibia paraguariensis* |  |  |  |  |  | 2 |  |  | 2 |
| 1222 | *Salta triflora+Libidibia paraguariensis+Aspidosperma quebracho-blanco* |  |  |  |  |  | 1 |  |  | 1 |
| 1223 | *Salta triflora+Libidibia paraguariensis+Aspidosperma quebracho-blanco+Mimozyganthus carinatus* |  |  |  |  |  | 1 |  |  | 1 |
| 1224 | *Salta triflora+Libidibia paraguariensis+Calycophyllum multiflorum* |  |  |  |  |  | 1 |  |  | 1 |
| 1225 | *Salta triflora+Libidibia paraguariensis+Ceiba chodatii* |  |  |  |  |  | 1 |  |  | 1 |
| 1226 | *Salta triflora+Libidibia paraguariensis+Sarcomphalus mistol* |  |  |  |  |  | 3 |  |  | 3 |
| 1227 | *Salta triflora+Phyllostylon rhamnoides+Calycophyllum multiflorum* |  |  |  |  |  | 1 |  |  | 1 |
| 1228 | *Salta triflora+Pisonia zapallo* |  |  |  |  |  | 1 |  |  | 1 |
| 1229 | *Salta triflora+Prosopis alba* |  |  |  |  |  | 1 |  |  | 1 |
| 1230 | *Salta triflora+Prosopis alba+Schinopsis lorentzii* |  |  |  |  |  | 2 |  |  | 2 |
| 1231 | *Salta triflora+Prosopis kuntzei* |  |  |  |  |  | 1 |  |  | 1 |
| 1232 | *Salta triflora+Prosopis kuntzei+Cordia americana* |  |  |  |  |  | 1 |  |  | 1 |
| 1233 | *Salta triflora+Prosopis kuntzei+Sarcomphalus mistol+Cynophalla retusa* |  |  |  |  |  | 1 |  |  | 1 |
| 1234 | *Salta triflora+Prosopis kuntzei+Sarcomphalus mistol+Senegalia praecox* |  |  |  |  |  | 1 |  |  | 1 |
| 1235 | *Salta triflora+Prosopis nigra+Prosopis hassleri* |  |  |  |  |  | 1 |  |  | 1 |
| 1236 | *Salta triflora+Prosopis ruscifolia+Tabebuia nodosa+Senegalia praecox* |  |  |  |  |  | 1 |  |  | 1 |
| 1237 | *Salta triflora+Sarcomphalus mistol* |  |  |  |  |  | 4 |  |  | 4 |
| 1238 | *Salta triflora+Sarcomphalus mistol+Anisocapparis speciosa+Gonopterodendron sarmientoi* |  |  |  |  |  | 1 |  |  | 1 |
| 1239 | *Salta triflora+Sarcomphalus mistol+Aspidosperma quebracho-blanco* |  |  |  |  |  | 2 |  |  | 2 |
| 1240 | *Salta triflora+Sarcomphalus mistol+Ceiba chodatii* |  |  |  |  |  | 1 |  |  | 1 |
| 1241 | *Salta triflora+Sarcomphalus mistol+Prosopis nigra* |  |  |  |  |  | 1 |  |  | 1 |
| 1242 | *Salta triflora+Sarcomphalus mistol+Schinopsis lorentzii* |  |  |  |  |  | 2 |  |  | 2 |
| 1243 | *Salta triflora+Sarcomphalus mistol+Schinopsis lorentzii+Vachellia astringens* |  |  |  |  |  | 1 |  |  | 1 |
| 1244 | *Salta triflora+Sarcomphalus mistol+Sideroxylon obtusifolium* |  |  |  |  |  | 1 |  |  | 1 |
| 1245 | *Salta triflora+Schinopsis lorentzii* |  |  |  |  |  | 1 |  |  | 1 |
| 1246 | *Salta triflora+Schinopsis lorentzii+Aspidosperma quebracho-blanco* |  |  |  |  |  | 2 |  |  | 2 |
| 1247 | *Salta triflora+Schinopsis lorentzii+Aspidosperma quebracho-blanco+Libidibia paraguariensis* |  |  |  |  |  | 1 |  |  | 1 |
| 1248 | *Salta triflora+Schinopsis lorentzii+Libidibia paraguariensis* |  |  |  |  |  | 1 |  |  | 1 |
| 1249 | *Salta triflora+Schinopsis lorentzii+Sarcomphalus mistol* |  |  |  |  |  | 1 |  |  | 1 |
| 1250 | *Salta triflora+Schinopsis lorentzii+Sarcomphalus mistol+Bougainvillea praecox* |  |  |  |  |  | 1 |  |  | 1 |
| 1251 | *Salta triflora+Schinopsis lorentzii+Sideroxylon obtusifolium* |  |  |  |  |  | 1 |  |  | 1 |
| 1252 | *Salta triflora+Schinus longifolius+Bougainvillea stipitata+Sarcomphalus mistol* |  |  |  |  |  | 1 |  |  | 1 |
| 1253 | *Salta triflora+Senegalia praecox+Bougainvillea praecox* |  |  |  |  |  | 1 |  |  | 1 |
| 1254 | *Salta triflora+Senegalia praecox+Handroanthus impetiginosus* |  |  |  |  |  | 1 |  |  | 1 |
| 1255 | *Salta triflora+Senegalia praecox+Prosopis ruscifolia* |  |  |  |  |  | 1 |  |  | 1 |
| 1256 | *Salta triflora+Senegalia praecox+Sarcomphalus mistol+Schinopsis lorentzii* |  |  |  |  |  | 1 |  |  | 1 |
| 1257 | *Salta triflora+Sideroxylon obtusifolium+Gonopterodendron sarmientoi* |  |  |  |  |  | 1 |  |  | 1 |
| 1258 | *Salta triflora+Sideroxylon obtusifolium+Prosopis nigra+Senegalia praecox* |  |  |  |  |  | 1 |  |  | 1 |
| 1259 | *Salta triflora+Sideroxylon obtusifolium+Sarcomphalus mistol+Aspidosperma quebracho-blanco* |  |  |  |  |  | 1 |  |  | 1 |
| 1260 | *Salta triflora+Sideroxylon obtusifolium+Schinopsis lorentzii* |  |  |  |  |  | 1 |  |  | 1 |
| 1261 | *Salta triflora+Sideroxylon obtusifolium+Schinopsis lorentzii+Cordia americana* |  |  |  |  |  | 1 |  |  | 1 |
| 1262 | *Salta triflora+Tabebuia nodosa* |  |  |  |  |  | 1 |  |  | 1 |
| 1263 | *Salta triflora+Tabebuia nodosa+Aspidosperma quebracho-blanco* |  |  |  |  |  | 1 |  |  | 1 |
| 1264 | *Salta triflora+Tabebuia nodosa+Libidibia paraguariensis* |  |  |  |  |  | 1 |  |  | 1 |
| 1265 | *Salta triflora+Tabebuia nodosa+Mimozyganthus carinatus* |  |  |  |  |  | 1 |  |  | 1 |
| 1266 | *Salta triflora+Tabebuia nodosa+Senegalia praecox* |  |  |  |  |  | 1 |  |  | 1 |
| ***Prosopis + others*** | |  |  |  |  |  |  |  |  |  |
| 1267 | *Aspidosperma quebracho-blanco* |  |  | 1 |  |  |  |  |  | 1 |
| 1268 | *Bougainvillea praecox+Prosopis alba+Aspidosperma quebracho-blanco* |  |  |  |  |  | 1 |  |  | 1 |
| 1269 | *Bougainvillea stipitata+Prosopis flexuosa* |  |  |  |  |  | 1 |  |  | 1 |
| 1270 | *Bulnesia retama+Prosopis flexuosa* |  |  |  |  |  | 1 |  |  | 1 |
| 1271 | *Bulnesia retama+Prosopis flexuosa+Parkinsonia praecox* |  |  |  |  |  | 1 |  |  | 1 |
| 1272 | *Erythroxylum microphyllum+Prosopis affinis* |  |  | 1 |  |  |  |  |  | 1 |
| 1273 | *Geoffroea decorticans* |  |  | 4 |  |  |  |  |  | 4 |
| 1274 | *Jodina rhombifolia+Prosopis nigra+Sarcomphalus mistol* |  |  |  |  |  | 1 |  |  | 1 |
| 1275 | *Phytolacca dioica+Prosopis affinis+Scutia buxifolia* |  |  | 1 |  |  |  |  |  | 1 |
| 1276 | *Pouteria salicifolia+Prosopis affinis+Scutia buxifolia* |  |  | 1 |  |  |  |  |  | 1 |
| 1277 | *Prosopis affinis* |  |  | 5 |  |  | 1 |  |  | 6 |
| 1278 | *Prosopis affinis+Myracrodruon balansae+Ruprechtia laxiflora* |  |  |  |  |  | 1 |  |  | 1 |
| 1279 | *Prosopis affinis+Prosopis nigra* |  |  | 2 |  |  |  |  |  | 2 |
| 1280 | *Prosopis affinis+Prosopis nigra+Trithrinax campestris* |  |  | 1 |  |  |  |  |  | 1 |
| 1281 | *Prosopis affinis+Schinus longifolius* |  |  | 1 |  |  |  |  |  | 1 |
| 1282 | *Prosopis affinis+Scutia buxifolia* |  |  | 1 |  |  |  |  |  | 1 |
| 1283 | *Prosopis affinis+Sideroxylon obtusifolium* |  |  | 1 |  |  | 1 |  |  | 2 |
| 1284 | *Prosopis affinis+Trithrinax campestris* |  |  | 1 |  |  |  |  |  | 1 |
| 1285 | *Prosopis affinis+Trithrinax campestris+Prosopis nigra* |  |  | 1 |  |  |  |  |  | 1 |
| 1286 | *Prosopis affinis+Vachellia astringens* |  |  | 1 |  |  |  |  |  | 1 |
| 1287 | *Prosopis affinis+Vachellia caven* |  |  | 9 |  |  |  |  |  | 9 |
| 1288 | *Prosopis affinis+Vachellia caven+Prosopis nigra* |  |  | 2 |  |  |  |  |  | 2 |
| 1289 | *Prosopis affinis+Vachellia caven+Trithrinax campestris* |  |  | 1 |  |  |  |  |  | 1 |
| 1290 | *Prosopis affinis+Zanthoxylum rhoifolium+Geoffroea decorticans* |  |  |  |  |  | 1 |  |  | 1 |
| 1291 | *Prosopis affinis+Zanthoxylum rhoifolium+Prosopis nigra* |  |  | 1 |  |  |  |  |  | 1 |
| 1292 | *Prosopis alba* |  |  | 1 | 3 |  | 16 |  |  | 20 |
| 1293 | *Prosopis alba+Albizia inundata+Prosopis ruscifolia* |  |  |  |  |  | 1 |  |  | 1 |
| 1294 | *Prosopis alba+Anisocapparis speciosa* |  |  |  |  |  | 1 |  |  | 1 |
| 1295 | *Prosopis alba+Aspidosperma quebracho-blanco* |  |  | 1 |  |  | 2 |  |  | 3 |
| 1296 | *Prosopis alba+Aspidosperma quebracho-blanco+Sarcomphalus mistol* |  |  |  |  |  | 2 |  |  | 2 |
| 1297 | *Prosopis alba+Celtis chichape* |  |  |  |  |  | 1 |  |  | 1 |
| 1298 | *Prosopis alba+Celtis chichape+Sarcomphalus mistol* |  |  |  |  |  | 1 |  |  | 1 |
| 1299 | *Prosopis alba+Celtis ehrenbergiana* |  |  |  |  |  | 1 |  |  | 1 |
| 1300 | *Prosopis alba+Celtis ehrenbergiana+Condalia buxifolia* |  |  |  |  |  | 1 |  |  | 1 |
| 1301 | *Prosopis alba+Celtis iguanaea* |  |  |  |  |  | 1 |  |  | 1 |
| 1302 | *Prosopis alba+Celtis iguanaea+Pterogyne nitens* |  |  |  |  |  | 1 |  |  | 1 |
| 1303 | *Prosopis alba+Copernicia alba* |  |  |  |  |  | 1 |  |  | 1 |
| 1304 | *Prosopis alba+Cynophalla retusa+Celtis iguanaea* |  |  |  |  |  | 1 |  |  | 1 |
| 1305 | *Prosopis alba+Diplokeleba floribunda+Ruprechtia laxiflora+Phytolacca dioica* |  |  |  |  |  | 1 |  |  | 1 |
| 1306 | *Prosopis alba+Geoffroea decorticans* |  |  |  |  |  | 3 |  |  | 3 |
| 1307 | *Prosopis alba+Geoffroea decorticans+Castela coccinea* |  |  |  |  |  | 1 |  |  | 1 |
| 1308 | *Prosopis alba+Geoffroea decorticans+Sideroxylon obtusifolium* |  |  |  |  |  | 1 |  |  | 1 |
| 1309 | *Prosopis alba+Gonopterodendron sarmientoi* |  |  |  |  |  | 1 |  |  | 1 |
| 1310 | *Prosopis alba+Gonopterodendron sarmientoi+Capparicordis tweediana* |  |  |  |  |  | 1 |  |  | 1 |
| 1311 | *Prosopis alba+Libidibia paraguariensis* |  |  |  |  |  | 2 |  |  | 2 |
| 1312 | *Prosopis alba+Libidibia paraguariensis+Ceiba chodatii+Schinopsis lorentzii* |  |  |  |  |  | 1 |  |  | 1 |
| 1313 | *Prosopis alba+Parkinsonia praecox* |  |  |  |  |  | 1 |  |  | 1 |
| 1314 | *Prosopis alba+Parkinsonia praecox+Prosopis torquata* |  |  |  |  |  | 1 |  |  | 1 |
| 1315 | *Prosopis alba+Phyllostylon rhamnoides+Diplokeleba floribunda+Ruprechtia laxiflora* |  |  |  |  |  | 1 |  |  | 1 |
| 1316 | *Prosopis alba+Phytolacca dioica+Senegalia praecox* |  |  |  |  |  | 1 |  |  | 1 |
| 1317 | *Prosopis alba+Pisonia zapallo* |  |  |  |  |  | 1 |  |  | 1 |
| 1318 | *Prosopis alba+Pisonia zapallo+Prosopis ruscifolia* |  |  |  |  |  | 1 |  |  | 1 |
| 1319 | *Prosopis alba+Pisonia zapallo+Salta triflora* |  |  |  |  |  | 1 |  |  | 1 |
| 1320 | *Prosopis alba+Pisonia zapallo+Salta triflora+Sarcomphalus mistol* |  |  |  |  |  | 1 |  |  | 1 |
| 1321 | *Prosopis alba+Pisonia zapallo+Schinopsis lorentzii* |  |  |  |  |  | 1 |  |  | 1 |
| 1322 | *Prosopis alba+Pisonia zapallo+Senegalia praecox* |  |  |  |  |  | 1 |  |  | 1 |
| 1323 | *Prosopis alba+Prosopis elata* |  |  |  |  |  | 1 |  |  | 1 |
| 1324 | *Prosopis alba+Prosopis flexuosa* |  |  |  | 1 |  | 1 |  |  | 2 |
| 1325 | *Prosopis alba+Prosopis kuntzei+Aspidosperma quebracho-blanco* |  |  |  |  |  | 1 |  |  | 1 |
| 1326 | *Prosopis alba+Prosopis kuntzei+Sarcomphalus mistol* |  |  |  |  |  | 1 |  |  | 1 |
| 1327 | *Prosopis alba+Prosopis nigra* |  |  |  |  |  | 2 |  |  | 2 |
| 1328 | *Prosopis alba+Prosopis nigra+Schinus longifolius+Copernicia alba* |  |  |  |  |  | 1 |  |  | 1 |
| 1329 | *Prosopis alba+Prosopis ruscifolia+Tabebuia nodosa* |  |  |  |  |  | 1 |  |  | 1 |
| 1330 | *Prosopis alba+Prosopis torquata* |  |  | 1 |  |  | 2 |  |  | 3 |
| 1331 | *Prosopis alba+Pterogyne nitens* |  |  |  |  |  | 1 |  |  | 1 |
| 1332 | *Prosopis alba+Ruprechtia apetala+Senegalia praecox* |  |  |  |  |  | 1 |  |  | 1 |
| 1333 | *Prosopis alba+Salta triflora* |  |  |  |  |  | 3 |  |  | 3 |
| 1334 | *Prosopis alba+Salta triflora+Aspidosperma quebracho-blanco+Ceiba chodatii* |  |  |  |  |  | 1 |  |  | 1 |
| 1335 | *Prosopis alba+Salta triflora+Geoffroea decorticans+Schinopsis lorentzii* |  |  |  |  |  | 1 |  |  | 1 |
| 1336 | *Prosopis alba+Sarcomphalus mistol* |  |  |  |  |  | 7 |  |  | 7 |
| 1337 | *Prosopis alba+Sarcomphalus mistol+Lachesiodendron viridiflorum* |  |  |  |  |  | 1 |  |  | 1 |
| 1338 | *Prosopis alba+Sarcomphalus mistol+Libidibia paraguariensis* |  |  |  |  |  | 1 |  |  | 1 |
| 1339 | *Prosopis alba+Sarcomphalus mistol+Salta triflora* |  |  |  |  |  | 1 |  |  | 1 |
| 1340 | *Prosopis alba+Sarcomphalus mistol+Schinus fasciculatus* |  |  |  |  |  | 1 |  |  | 1 |
| 1341 | *Prosopis alba+Schinopsis balansae+Prosopis nigra* |  |  |  |  |  | 1 |  |  | 1 |
| 1342 | *Prosopis alba+Schinopsis balansae+Ruprechtia laxiflora* |  |  |  |  |  | 1 |  |  | 1 |
| 1343 | *Prosopis alba+Schinopsis balansae+Senegalia praecox* |  |  |  |  |  | 1 |  |  | 1 |
| 1344 | *Prosopis alba+Schinopsis balansae+Tabebuia nodosa* |  |  |  |  |  | 2 |  |  | 2 |
| 1345 | *Prosopis alba+Schinopsis lorentzii+Aspidosperma quebracho-blanco* |  |  |  |  |  | 1 |  |  | 1 |
| 1346 | *Prosopis alba+Senegalia praecox* |  |  |  |  |  | 1 |  |  | 1 |
| 1347 | *Prosopis alba+Senegalia praecox+Gleditsia amorphoides+Cordia americana* |  |  |  |  |  | 1 |  |  | 1 |
| 1348 | *Prosopis alba+Senegalia praecox+Gonopterodendron sarmientoi* |  |  |  |  |  | 1 |  |  | 1 |
| 1349 | *Prosopis alba+Senegalia praecox+Prosopis kuntzei* |  |  |  |  |  | 1 |  |  | 1 |
| 1350 | *Prosopis alba+Senegalia praecox+Vachellia aroma* |  |  |  |  |  | 1 |  |  | 1 |
| 1351 | *Prosopis alba+Sideroxylon obtusifolium* |  |  |  |  |  | 3 |  |  | 3 |
| 1352 | *Prosopis alba+Tabebuia nodosa* |  |  |  |  |  | 2 |  |  | 2 |
| 1353 | *Prosopis alba+Tabebuia nodosa+Prosopis kuntzei* |  |  |  |  |  | 1 |  |  | 1 |
| 1354 | *Prosopis alba+Tabebuia nodosa+Senegalia praecox* |  |  |  |  |  | 1 |  |  | 1 |
| 1355 | *Prosopis alba+Trithrinax campestris+Senegalia bonariensis+Scutia buxifolia* |  |  | 1 |  |  |  |  |  | 1 |
| 1356 | *Prosopis alba+Vachellia aroma* |  |  |  |  |  | 2 |  |  | 2 |
| 1357 | *Prosopis alba+Vachellia aroma+Geoffroea decorticans* |  |  |  |  |  | 1 |  |  | 1 |
| 1358 | *Prosopis alba+Vachellia aroma+Myrrhinium atropurpureum* |  |  |  |  |  | 1 |  |  | 1 |
| 1359 | *Prosopis alba+Vachellia aroma+Prosopis nigra+Schinus piliferus* |  |  |  |  |  | 1 |  |  | 1 |
| 1360 | *Prosopis alpataco* |  |  |  | 2 |  |  |  |  | 2 |
| 1361 | *Prosopis alpataco+Geoffroea decorticans* |  |  |  | 1 |  |  |  |  | 1 |
| 1362 | *Prosopis alpataco+Vachellia caven* |  |  |  |  |  | 1 |  |  | 1 |
| 1363 | *Prosopis caldenia* |  |  | 72 |  |  | 1 |  |  | 73 |
| 1364 | *Prosopis caldenia+Geoffroea decorticans* |  |  | 1 |  |  |  |  |  | 1 |
| 1365 | *Prosopis caldenia+Jodina rhombifolia* |  |  | 1 |  |  |  |  |  | 1 |
| 1366 | *Prosopis caldenia+Prosopis flexuosa* |  |  | 4 |  |  |  |  |  | 4 |
| 1367 | *Prosopis caldenia+Prosopis nigra* |  |  |  | 1 |  |  |  |  | 1 |
| 1368 | *Prosopis caldenia+Schinus polygamus* |  |  | 2 |  |  |  |  |  | 2 |
| 1369 | *Prosopis chilensis* |  |  | 2 | 4 |  | 2 |  |  | 8 |
| 1370 | *Prosopis chilensis+Aspidosperma quebracho-blanco* |  |  |  |  |  | 1 |  |  | 1 |
| 1371 | *Prosopis chilensis+Celtis ehrenbergiana* |  |  |  | 1 |  | 1 |  |  | 2 |
| 1372 | *Prosopis chilensis+Prosopis alba* |  |  |  |  |  | 1 |  |  | 1 |
| 1373 | *Prosopis chilensis+Prosopis flexuosa* |  |  |  | 1 |  |  |  |  | 1 |
| 1374 | *Prosopis chilensis+Prosopis flexuosa+Prosopis torquata* |  |  |  |  |  | 1 |  |  | 1 |
| 1375 | *Prosopis elata+Sarcomphalus mistol* |  |  |  |  |  | 1 |  |  | 1 |
| 1376 | *Prosopis flexuosa* |  |  | 6 | 37 |  | 48 |  |  | 91 |
| 1377 | *Prosopis flexuosa+Aspidosperma quebracho-blanco* |  |  |  |  |  | 6 |  |  | 6 |
| 1378 | *Prosopis flexuosa+Atamisquea emarginata* |  |  |  | 1 |  |  |  |  | 1 |
| 1379 | *Prosopis flexuosa+Bulnesia retama* |  |  |  | 1 |  | 2 |  |  | 3 |
| 1380 | *Prosopis flexuosa+Bulnesia retama+Aspidosperma quebracho-blanco* |  |  |  |  |  | 1 |  |  | 1 |
| 1381 | *Prosopis flexuosa+Bulnesia retama+Parkinsonia praecox* |  |  |  |  |  | 1 |  |  | 1 |
| 1382 | *Prosopis flexuosa+Geoffroea decorticans* |  |  | 1 | 3 |  | 1 |  |  | 5 |
| 1383 | *Prosopis flexuosa+Larrea cuneifolia* |  |  |  | 1 |  |  |  |  | 1 |
| 1384 | *Prosopis flexuosa+Larrea divaricata* |  |  |  |  |  | 2 |  |  | 2 |
| 1385 | *Prosopis flexuosa+Mimozyganthus carinatus* |  |  |  |  |  | 2 |  |  | 2 |
| 1386 | *Prosopis flexuosa+Parkinsonia praecox* |  |  | 2 |  |  | 12 |  |  | 14 |
| 1387 | *Prosopis flexuosa+Parkinsonia praecox+Bulnesia retama* |  |  |  |  |  | 1 |  |  | 1 |
| 1388 | *Prosopis flexuosa+Parkinsonia praecox+Mimozyganthus carinatus* |  |  |  |  |  | 1 |  |  | 1 |
| 1389 | *Prosopis flexuosa+Prosopis alba* |  |  | 2 | 1 |  |  |  |  | 3 |
| 1390 | *Prosopis flexuosa+Prosopis alpataco* |  |  |  |  |  | 1 |  |  | 1 |
| 1391 | *Prosopis flexuosa+Prosopis caldenia* |  |  | 1 |  |  |  |  |  | 1 |
| 1392 | *Prosopis flexuosa+Prosopis nigra* |  |  |  | 2 |  | 1 |  |  | 3 |
| 1393 | *Prosopis flexuosa+Prosopis torquata* |  |  |  |  |  | 4 |  |  | 4 |
| 1394 | *Prosopis flexuosa+Ramorinoa girolae* |  |  |  | 1 |  |  |  |  | 1 |
| 1395 | *Prosopis flexuosa+Sarcomphalus mistol* |  |  |  |  |  | 1 |  |  | 1 |
| 1396 | *Prosopis flexuosa+Schinus fasciculatus* |  |  |  |  |  | 1 |  |  | 1 |
| 1397 | *Prosopis hassleri* |  |  |  |  |  | 1 |  |  | 1 |
| 1398 | *Prosopis hassleri+Copernicia alba* |  |  |  |  |  | 1 |  |  | 1 |
| 1399 | *Prosopis hassleri+Pisonia zapallo+Prosopis ruscifolia* |  |  |  |  |  | 1 |  |  | 1 |
| 1400 | *Prosopis hassleri+Prosopis ruscifolia+Prosopis nigra* |  |  |  |  |  | 1 |  |  | 1 |
| 1401 | *Prosopis hassleri+Sarcomphalus mistol+Sideroxylon obtusifolium* |  |  |  |  |  | 1 |  |  | 1 |
| 1402 | *Prosopis kuntzei* |  |  |  |  |  | 1 |  |  | 1 |
| 1403 | *Prosopis kuntzei+Anisocapparis speciosa* |  |  |  |  |  | 1 |  |  | 1 |
| 1404 | *Prosopis kuntzei+Aspidosperma quebracho-blanco* |  |  |  |  |  | 1 |  |  | 1 |
| 1405 | *Prosopis kuntzei+Aspidosperma quebracho-blanco+Pisonia zapallo* |  |  |  |  |  | 1 |  |  | 1 |
| 1406 | *Prosopis kuntzei+Aspidosperma quebracho-blanco+Salta triflora* |  |  |  |  |  | 1 |  |  | 1 |
| 1407 | *Prosopis kuntzei+Aspidosperma quebracho-blanco+Sarcomphalus mistol* |  |  |  |  |  | 1 |  |  | 1 |
| 1408 | *Prosopis kuntzei+Aspidosperma quebracho-blanco+Schinopsis lorentzii+Senegalia praecox* |  |  |  |  |  | 1 |  |  | 1 |
| 1409 | *Prosopis kuntzei+Aspidosperma quebracho-blanco+Senegalia praecox* |  |  |  |  |  | 1 |  |  | 1 |
| 1410 | *Prosopis kuntzei+Aspidosperma quebracho-blanco+Senegalia praecox+Prosopis nigra* |  |  |  |  |  | 1 |  |  | 1 |
| 1411 | *Prosopis kuntzei+Aspidosperma quebracho-blanco+Trithrinax schyzophylla var. schyzophylla* |  |  |  |  |  | 1 |  |  | 1 |
| 1412 | *Prosopis kuntzei+Bougainvillea praecox+Aspidosperma quebracho-blanco* |  |  |  |  |  | 1 |  |  | 1 |
| 1413 | *Prosopis kuntzei+Libidibia paraguariensis+Prosopis nigra* |  |  |  |  |  | 1 |  |  | 1 |
| 1414 | *Prosopis kuntzei+Prosopis alba+Senegalia gilliesii* |  |  |  |  |  | 1 |  |  | 1 |
| 1415 | *Prosopis kuntzei+Prosopis nigra* |  |  |  |  |  | 1 |  |  | 1 |
| 1416 | *Prosopis kuntzei+Prosopis nigra+Aspidosperma quebracho-blanco* |  |  |  |  |  | 1 |  |  | 1 |
| 1417 | *Prosopis kuntzei+Prosopis ruscifolia* |  |  |  |  |  | 1 |  |  | 1 |
| 1418 | *Prosopis kuntzei+Prosopis ruscifolia+Prosopis nigra+Anisocapparis speciosa* |  |  |  |  |  | 1 |  |  | 1 |
| 1419 | *Prosopis kuntzei+Sarcomphalus mistol* |  |  |  |  |  | 1 |  |  | 1 |
| 1420 | *Prosopis kuntzei+Sarcomphalus mistol+Aspidosperma quebracho-blanco* |  |  |  |  |  | 1 |  |  | 1 |
| 1421 | *Prosopis kuntzei+Sarcomphalus mistol+Prosopis ruscifolia+Aspidosperma quebracho-blanco* |  |  |  |  |  | 1 |  |  | 1 |
| 1422 | *Prosopis kuntzei+Sarcomphalus mistol+Schinopsis balansae+Senegalia praecox* |  |  |  |  |  | 1 |  |  | 1 |
| 1423 | *Prosopis kuntzei+Sarcomphalus mistol+Senegalia praecox* |  |  |  |  |  | 1 |  |  | 1 |
| 1424 | *Prosopis kuntzei+Schinopsis balansae+Aspidosperma quebracho-blanco+Libidibia paraguariensis* |  |  |  |  |  | 1 |  |  | 1 |
| 1425 | *Prosopis kuntzei+Schinopsis heterophylla* |  |  |  |  |  | 1 |  |  | 1 |
| 1426 | *Prosopis kuntzei+Schinopsis lorentzii* |  |  |  |  |  | 2 |  |  | 2 |
| 1427 | *Prosopis kuntzei+Schinopsis lorentzii+Aspidosperma quebracho-blanco+Senegalia praecox* |  |  |  |  |  | 1 |  |  | 1 |
| 1428 | *Prosopis kuntzei+Schinopsis lorentzii+Sarcomphalus mistol* |  |  |  |  |  | 1 |  |  | 1 |
| 1429 | *Prosopis kuntzei+Schinopsis lorentzii+Sarcomphalus mistol+Senegalia praecox* |  |  |  |  |  | 1 |  |  | 1 |
| 1430 | *Prosopis kuntzei+Schinopsis lorentzii+Sideroxylon obtusifolium* |  |  |  |  |  | 1 |  |  | 1 |
| 1431 | *Prosopis kuntzei+Senegalia praecox* |  |  |  |  |  | 3 |  |  | 3 |
| 1432 | *Prosopis kuntzei+Senegalia praecox+Achatocarpus praecox* |  |  |  |  |  | 1 |  |  | 1 |
| 1433 | *Prosopis kuntzei+Sideroxylon obtusifolium+Bougainvillea stipitata+Senegalia praecox* |  |  |  |  |  | 1 |  |  | 1 |
| 1434 | *Prosopis kuntzei+Tabebuia nodosa+Salta triflora+Senegalia praecox* |  |  |  |  |  | 1 |  |  | 1 |
| 1435 | *Prosopis nigra* |  | 2 | 11 | 5 |  | 40 |  |  | 58 |
| 1436 | *Prosopis nigra + Geoffroea decorticans* |  |  | 2 |  |  |  |  |  | 2 |
| 1437 | *Prosopis nigra+Aspidosperma quebracho-blanco* |  |  | 1 |  |  | 16 |  |  | 17 |
| 1438 | *Prosopis nigra+Aspidosperma quebracho-blanco+Parkinsonia praecox* |  |  |  |  |  | 1 |  |  | 1 |
| 1439 | *Prosopis nigra+Aspidosperma quebracho-blanco+Sarcomphalus mistol* |  |  |  |  |  | 4 |  |  | 4 |
| 1440 | *Prosopis nigra+Aspidosperma quebracho-blanco+Schinopsis lorentzii* |  |  |  |  |  | 2 |  |  | 2 |
| 1441 | *Prosopis nigra+Aspidosperma quebracho-blanco+Schinus fasciculatus+Prosopis alba* |  |  |  |  |  | 1 |  |  | 1 |
| 1442 | *Prosopis nigra+Bulnesia retama* |  |  |  | 1 |  |  |  |  | 1 |
| 1443 | *Prosopis nigra+Celtis chichape+Sarcomphalus mistol* |  |  |  |  |  | 1 |  |  | 1 |
| 1444 | *Prosopis nigra+Celtis ehrenbergiana* |  |  |  |  |  | 4 |  |  | 4 |
| 1445 | *Prosopis nigra+Celtis ehrenbergiana+Prosopis vinalillo* |  |  |  |  |  | 1 |  |  | 1 |
| 1446 | *Prosopis nigra+Copernicia alba* |  |  |  |  |  | 1 |  |  | 1 |
| 1447 | *Prosopis nigra+Copernicia alba+Phyllostylon rhamnoides* |  |  |  |  |  | 1 |  |  | 1 |
| 1448 | *Prosopis nigra+Copernicia alba+Prosopis alba* |  |  |  |  |  | 1 |  |  | 1 |
| 1449 | *Prosopis nigra+Copernicia alba+Tabebuia nodosa* |  |  |  |  |  | 1 |  |  | 1 |
| 1450 | *Prosopis nigra+Cynophalla retusa+Prosopis ruscifolia* |  |  |  |  |  | 2 |  |  | 2 |
| 1451 | *Prosopis nigra+Diplokeleba floribunda+Senegalia praecox* |  |  |  |  |  | 1 |  |  | 1 |
| 1452 | *Prosopis nigra+Eugenia uniflora* |  |  |  |  |  | 1 |  |  | 1 |
| 1453 | *Prosopis nigra+Geoffroea decorticans* |  |  | 2 |  |  | 6 |  |  | 8 |
| 1454 | *Prosopis nigra+Geoffroea decorticans+Condalia buxifolia+Ceiba chodatii* |  |  |  |  |  | 1 |  |  | 1 |
| 1455 | *Prosopis nigra+Geoffroea decorticans+Schinopsis lorentzii* |  |  | 1 |  |  |  |  |  | 1 |
| 1456 | *Prosopis nigra+Geoffroea decorticans+Sideroxylon obtusifolium* |  |  |  |  |  | 1 |  |  | 1 |
| 1457 | *Prosopis nigra+Gleditsia amorphoides* |  |  |  |  |  | 1 |  |  | 1 |
| 1458 | *Prosopis nigra+Libidibia paraguariensis+Sarcomphalus mistol* |  |  |  |  |  | 1 |  |  | 1 |
| 1459 | *Prosopis nigra+Myrcianthes cisplatensis+Celtis ehrenbergiana* |  |  |  |  |  | 1 |  |  | 1 |
| 1460 | *Prosopis nigra+Parkinsonia praecox* |  |  |  |  |  | 3 |  |  | 3 |
| 1461 | *Prosopis nigra+Parkinsonia praecox+Aspidosperma quebracho-blanco* |  |  |  |  |  | 1 |  |  | 1 |
| 1462 | *Prosopis nigra+Parkinsonia praecox+Prosopis ruscifolia* |  |  |  |  |  | 1 |  |  | 1 |
| 1463 | *Prosopis nigra+Parkinsonia praecox+Sarcomphalus mistol* |  |  |  |  |  | 1 |  |  | 1 |
| 1464 | *Prosopis nigra+Parkinsonia praecox+Schinopsis balansae* |  |  |  |  |  | 1 |  |  | 1 |
| 1465 | *Prosopis nigra+Parkinsonia praecox+Senegalia gilliesii* |  |  |  |  |  | 1 |  |  | 1 |
| 1466 | *Prosopis nigra+Pisonia zapallo+Copernicia alba* |  |  |  |  |  | 1 |  |  | 1 |
| 1467 | *Prosopis nigra+Prosopis affinis* |  |  | 1 |  |  | 2 |  |  | 3 |
| 1468 | *Prosopis nigra+Prosopis alba* |  |  |  |  |  | 1 |  |  | 1 |
| 1469 | *Prosopis nigra+Prosopis alba+Senegalia praecox+Prosopis kuntzei* |  |  |  |  |  | 1 |  |  | 1 |
| 1470 | *Prosopis nigra+Prosopis chilensis* |  |  |  |  |  | 1 |  |  | 1 |
| 1471 | *Prosopis nigra+Prosopis flexuosa* |  |  |  | 1 |  | 1 |  |  | 2 |
| 1472 | *Prosopis nigra+Prosopis kuntzei* |  |  |  |  |  | 3 |  |  | 3 |
| 1473 | *Prosopis nigra+Prosopis kuntzei+Aspidosperma quebracho-blanco* |  |  |  |  |  | 1 |  |  | 1 |
| 1474 | *Prosopis nigra+Prosopis kuntzei+Sarcomphalus mistol* |  |  |  |  |  | 2 |  |  | 2 |
| 1475 | *Prosopis nigra+Prosopis ruscifolia* |  |  |  |  |  | 2 |  |  | 2 |
| 1476 | *Prosopis nigra+Prosopis ruscifolia+Cynophalla retusa+Sarcomphalus mistol* |  |  |  |  |  | 1 |  |  | 1 |
| 1477 | *Prosopis nigra+Prosopis ruscifolia+Sarcomphalus mistol+Sideroxylon obtusifolium* |  |  |  |  |  | 1 |  |  | 1 |
| 1478 | *Prosopis nigra+Prosopis vinalillo* |  |  |  |  |  | 1 |  |  | 1 |
| 1479 | *Prosopis nigra+Ruprechtia laxiflora* |  |  | 1 |  |  |  |  |  | 1 |
| 1480 | *Prosopis nigra+Salta triflora* |  |  |  |  |  | 2 |  |  | 2 |
| 1481 | *Prosopis nigra+Salta triflora+Aspidosperma quebracho-blanco+Schinopsis lorentzii* |  |  |  |  |  | 1 |  |  | 1 |
| 1482 | *Prosopis nigra+Salta triflora+Terminalia triflora* |  |  |  |  |  | 1 |  |  | 1 |
| 1483 | *Prosopis nigra+Sapium haematospermum* |  |  |  |  |  | 1 |  |  | 1 |
| 1484 | *Prosopis nigra+Sarcomphalus mistol* |  |  |  |  |  | 11 |  |  | 11 |
| 1485 | *Prosopis nigra+Sarcomphalus mistol+Aspidosperma quebracho-blanco* |  |  |  |  |  | 2 |  |  | 2 |
| 1486 | *Prosopis nigra+Sarcomphalus mistol+Cynophalla retusa+Prosopis hassleri* |  |  |  |  |  | 1 |  |  | 1 |
| 1487 | *Prosopis nigra+Sarcomphalus mistol+Geoffroea decorticans+Parkinsonia praecox* |  |  |  |  |  | 1 |  |  | 1 |
| 1488 | *Prosopis nigra+Sarcomphalus mistol+Parkinsonia praecox* |  |  |  |  |  | 1 |  |  | 1 |
| 1489 | *Prosopis nigra+Sarcomphalus mistol+Prosopis alba* |  |  |  |  |  | 1 |  |  | 1 |
| 1490 | *Prosopis nigra+Schinopsis balansae* |  |  |  |  |  | 1 |  |  | 1 |
| 1491 | *Prosopis nigra+Schinopsis balansae+Celtis ehrenbergiana* |  |  |  |  |  | 1 |  |  | 1 |
| 1492 | *Prosopis nigra+Schinopsis balansae+Senegalia praecox* |  |  |  |  |  | 1 |  |  | 1 |
| 1493 | *Prosopis nigra+Schinopsis lorentzii* |  |  |  |  |  | 1 |  |  | 1 |
| 1494 | *Prosopis nigra+Schinopsis lorentzii+Aspidosperma quebracho-blanco* |  |  |  |  |  | 2 |  |  | 2 |
| 1495 | *Prosopis nigra+Schinopsis lorentzii+Parkinsonia praecox* |  |  |  |  |  | 1 |  |  | 1 |
| 1496 | *Prosopis nigra+Schinopsis lorentzii+Prosopis kuntzei* |  |  |  |  |  | 1 |  |  | 1 |
| 1497 | *Prosopis nigra+Schinus fasciculatus* |  |  |  |  |  | 2 |  |  | 2 |
| 1498 | *Prosopis nigra+Schinus longifolius* |  |  | 1 |  |  |  |  |  | 1 |
| 1499 | *Prosopis nigra+Schinus longifolius+Celtis ehrenbergiana+Allophylus edulis* |  |  | 1 |  |  |  |  |  | 1 |
| 1500 | *Prosopis nigra+Senegalia bonariensis* |  |  | 1 |  |  |  |  |  | 1 |
| 1501 | *Prosopis nigra+Senegalia gilliesii* |  |  |  |  |  | 1 |  |  | 1 |
| 1502 | *Prosopis nigra+Senegalia gilliesii+Senegalia praecox* |  |  |  |  |  | 1 |  |  | 1 |
| 1503 | *Prosopis nigra+Senegalia praecox* |  |  |  |  |  | 3 |  |  | 3 |
| 1504 | *Prosopis nigra+Senegalia praecox+Achatocarpus praecox+Cordia americana* |  |  |  |  |  | 1 |  |  | 1 |
| 1505 | *Prosopis nigra+Senegalia praecox+Vachellia aroma* |  |  |  |  |  | 1 |  |  | 1 |
| 1506 | *Prosopis nigra+Sideroxylon obtusifolium* |  |  | 1 |  |  |  |  |  | 1 |
| 1507 | *Prosopis nigra+Sideroxylon obtusifolium+Schinopsis balansae* |  |  |  |  |  | 1 |  |  | 1 |
| 1508 | *Prosopis nigra+Sideroxylon obtusifolium+Scutia buxifolia* |  |  | 1 |  |  |  |  |  | 1 |
| 1509 | *Prosopis nigra+Sideroxylon obtusifolium+Senegalia praecox* |  |  |  |  |  | 1 |  |  | 1 |
| 1510 | *Prosopis nigra+Tabebuia nodosa* |  |  |  |  |  | 3 |  |  | 3 |
| 1511 | *Prosopis nigra+Tabebuia nodosa+Gleditsia amorphoides* |  |  |  |  |  | 1 |  |  | 1 |
| 1512 | *Prosopis nigra+Tabebuia nodosa+Schinopsis balansae* |  |  |  |  |  | 1 |  |  | 1 |
| 1513 | *Prosopis nigra+Tessaria integrifolia* |  |  |  |  |  | 1 |  |  | 1 |
| 1514 | *Prosopis nigra+Trithrinax campestris* |  |  | 2 |  |  |  |  |  | 2 |
| 1515 | *Prosopis nigra+Trithrinax campestris+Vachellia caven* |  |  | 1 |  |  |  |  |  | 1 |
| 1516 | *Prosopis nigra+Vachellia aroma* |  |  |  |  |  | 3 |  |  | 3 |
| 1517 | *Prosopis nigra+Vachellia astringens* |  |  |  |  |  | 1 |  |  | 1 |
| 1518 | *Prosopis nigra+Vachellia caven* |  |  | 4 |  |  |  |  |  | 4 |
| 1519 | *Prosopis nigra+Vachellia caven+Geoffroea decorticans+Blepharocalyx salicifolius* |  |  | 1 |  |  |  |  |  | 1 |
| 1520 | *Prosopis nigra+Vachellia caven+Ruprechtia laxiflora* |  |  | 1 |  |  |  |  |  | 1 |
| 1521 | *Prosopis ruscifolia* |  |  |  |  |  | 75 |  |  | 75 |
| 1522 | *Prosopis ruscifolia+Aspidosperma quebracho-blanco* |  |  |  |  |  | 4 |  |  | 4 |
| 1523 | *Prosopis ruscifolia+Aspidosperma quebracho-blanco+Parkinsonia praecox* |  |  |  |  |  | 1 |  |  | 1 |
| 1524 | *Prosopis ruscifolia+Aspidosperma quebracho-blanco+Prosopis nigra* |  |  |  |  |  | 1 |  |  | 1 |
| 1525 | *Prosopis ruscifolia+Aspidosperma quebracho-blanco+Sarcomphalus mistol* |  |  |  |  |  | 1 |  |  | 1 |
| 1526 | *Prosopis ruscifolia+Bougainvillea praecox+Aspidosperma triternatum+Trithrinax schyzophylla var. schyzophylla* |  |  |  |  |  | 1 |  |  | 1 |
| 1527 | *Prosopis ruscifolia+Celtis chichape* |  |  |  |  |  | 1 |  |  | 1 |
| 1528 | *Prosopis ruscifolia+Copernicia alba* |  |  |  |  |  | 3 |  |  | 3 |
| 1529 | *Prosopis ruscifolia+Cordia americana+Prosopis kuntzei* |  |  |  |  |  | 1 |  |  | 1 |
| 1530 | *Prosopis ruscifolia+Cordia americana+Salta triflora+Aspidosperma triternatum* |  |  |  |  |  | 1 |  |  | 1 |
| 1531 | *Prosopis ruscifolia+Cordia americana+Schinopsis balansae+Aspidosperma quebracho-blanco* |  |  |  |  |  | 1 |  |  | 1 |
| 1532 | *Prosopis ruscifolia+Cynophalla retusa* |  |  |  |  |  | 3 |  |  | 3 |
| 1533 | *Prosopis ruscifolia+Cynophalla retusa+Prosopis kuntzei* |  |  |  |  |  | 1 |  |  | 1 |
| 1534 | *Prosopis ruscifolia+Cynophalla retusa+Prosopis nigra* |  |  |  |  |  | 1 |  |  | 1 |
| 1535 | *Prosopis ruscifolia+Cynophalla retusa+Prosopis nigra+Libidibia paraguariensis* |  |  |  |  |  | 1 |  |  | 1 |
| 1536 | *Prosopis ruscifolia+Geoffroea decorticans* |  |  |  |  |  | 3 |  |  | 3 |
| 1537 | *Prosopis ruscifolia+Geoffroea decorticans+Sarcomphalus mistol* |  |  |  |  |  | 1 |  |  | 1 |
| 1538 | *Prosopis ruscifolia+Gonopterodendron sarmientoi* |  |  |  |  |  | 1 |  |  | 1 |
| 1539 | *Prosopis ruscifolia+Libidibia paraguariensis+Aspidosperma quebracho-blanco* |  |  |  |  |  | 1 |  |  | 1 |
| 1540 | *Prosopis ruscifolia+Mimozyganthus carinatus* |  |  |  |  |  | 1 |  |  | 1 |
| 1541 | *Prosopis ruscifolia+Parkinsonia praecox* |  |  |  |  |  | 3 |  |  | 3 |
| 1542 | *Prosopis ruscifolia+Phyllostylon rhamnoides+Diplokeleba floribunda* |  |  |  |  |  | 1 |  |  | 1 |
| 1543 | *Prosopis ruscifolia+Prosopis nigra* |  |  |  |  |  | 5 |  |  | 5 |
| 1544 | *Prosopis ruscifolia+Prosopis nigra+Geoffroea decorticans+Prosopis alba* |  |  |  |  |  | 1 |  |  | 1 |
| 1545 | *Prosopis ruscifolia+Prosopis nigra+Parkinsonia praecox* |  |  |  |  |  | 1 |  |  | 1 |
| 1546 | *Prosopis ruscifolia+Prosopis nigra+Sarcomphalus mistol* |  |  |  |  |  | 1 |  |  | 1 |
| 1547 | *Prosopis ruscifolia+Prosopis nigra+Vachellia caven* |  |  |  |  |  | 1 |  |  | 1 |
| 1548 | *Prosopis ruscifolia+Prosopis vinalillo+Geoffroea decorticans* |  |  |  |  |  | 1 |  |  | 1 |
| 1549 | *Prosopis ruscifolia+Salta triflora* |  |  |  |  |  | 1 |  |  | 1 |
| 1550 | *Prosopis ruscifolia+Salta triflora+Schinopsis lorentzii* |  |  |  |  |  | 1 |  |  | 1 |
| 1551 | *Prosopis ruscifolia+Sarcomphalus mistol* |  |  |  |  |  | 8 |  |  | 8 |
| 1552 | *Prosopis ruscifolia+Sarcomphalus mistol+Aspidosperma quebracho-blanco* |  |  |  |  |  | 2 |  |  | 2 |
| 1553 | *Prosopis ruscifolia+Sarcomphalus mistol+Mimozyganthus carinatus* |  |  |  |  |  | 1 |  |  | 1 |
| 1554 | *Prosopis ruscifolia+Sarcomphalus mistol+Prosopis nigra* |  |  |  |  |  | 1 |  |  | 1 |
| 1555 | *Prosopis ruscifolia+Sarcomphalus mistol+Schinopsis lorentzii* |  |  |  |  |  | 1 |  |  | 1 |
| 1556 | *Prosopis ruscifolia+Sarcomphalus mistol+Trithrinax schizophylla var. biflabellata+Bougainvillea stipitata* |  |  |  |  |  | 1 |  |  | 1 |
| 1557 | *Prosopis ruscifolia+Schinopsis balansae* |  |  |  |  |  | 1 |  |  | 1 |
| 1558 | *Prosopis ruscifolia+Schinopsis lorentzii+Prosopis alba* |  |  |  |  |  | 1 |  |  | 1 |
| 1559 | *Prosopis ruscifolia+Schinopsis lorentzii+Vallesia glabra* |  |  |  |  |  | 1 |  |  | 1 |
| 1560 | *Prosopis ruscifolia+Senegalia praecox+Aspidosperma quebracho-blanco* |  |  |  |  |  | 1 |  |  | 1 |
| 1561 | *Prosopis ruscifolia+Senegalia praecox+Prosopis kuntzei* |  |  |  |  |  | 1 |  |  | 1 |
| 1562 | *Prosopis ruscifolia+Senegalia praecox+Prosopis nigra* |  |  |  |  |  | 1 |  |  | 1 |
| 1563 | *Prosopis ruscifolia+Sideroxylon obtusifolium+Sarcomphalus mistol* |  |  |  |  |  | 1 |  |  | 1 |
| 1564 | *Prosopis ruscifolia+Sideroxylon obtusifolium+Senegalia praecox* |  |  |  |  |  | 1 |  |  | 1 |
| 1565 | *Prosopis ruscifolia+Tabebuia nodosa* |  |  |  |  |  | 6 |  |  | 6 |
| 1566 | *Prosopis ruscifolia+Tabebuia nodosa+Achatocarpus praecox* |  |  |  |  |  | 1 |  |  | 1 |
| 1567 | *Prosopis ruscifolia+Tabebuia nodosa+Aspidosperma triternatum* |  |  |  |  |  | 1 |  |  | 1 |
| 1568 | *Prosopis ruscifolia+Tabebuia nodosa+Salta triflora* |  |  |  |  |  | 1 |  |  | 1 |
| 1569 | *Prosopis ruscifolia+Tabebuia nodosa+Sarcomphalus mistol* |  |  |  |  |  | 1 |  |  | 1 |
| 1570 | *Prosopis ruscifolia+Trichilia catigua+Bougainvillea stipitata* |  |  |  |  |  | 1 |  |  | 1 |
| 1571 | *Prosopis ruscifolia+Trichilia catigua+Sideroxylon obtusifolium+Prosopis nigra* |  |  |  |  |  | 1 |  |  | 1 |
| 1572 | *Prosopis ruscifolia+Trithrinax schizophylla var. biflabellata+Parkinsonia praecox* |  |  |  |  |  | 1 |  |  | 1 |
| 1573 | *Prosopis ruscifolia+Trithrinax schyzophylla var. schyzophylla* |  |  |  |  |  | 1 |  |  | 1 |
| 1574 | *Prosopis ruscifolia+Vachellia caven* |  |  |  |  |  | 2 |  |  | 2 |
| 1575 | *Prosopis ruscifolia+Vallesia glabra* |  |  |  |  |  | 1 |  |  | 1 |
| 1576 | *Prosopis torquata* |  |  | 1 | 1 |  | 5 |  |  | 7 |
| 1577 | *Prosopis torquata+Aspidosperma quebracho-blanco* |  |  |  |  |  | 1 |  |  | 1 |
| 1578 | *Prosopis torquata+Aspidosperma quebracho-blanco+Celtis ehrenbergiana* |  |  |  |  |  | 1 |  |  | 1 |
| 1579 | *Prosopis torquata+Parkinsonia praecox+Prosopis nigra* |  |  |  |  |  | 1 |  |  | 1 |
| 1580 | *Prosopis torquata+Prosopis flexuosa* |  |  |  |  |  | 2 |  |  | 2 |
| 1581 | *Prosopis torquata+Prosopis nigra* |  |  |  |  |  | 2 |  |  | 2 |
| 1582 | *Prosopis torquata+Senegalia gilliesii+Aspidosperma quebracho-blanco* |  |  |  |  |  | 1 |  |  | 1 |
| 1583 | *Prosopis vinalillo+Prosopis nigra* |  |  |  |  |  | 1 |  |  | 1 |
| 1584 | *Schinus fasciculatus+Prosopis flexuosa* |  |  | 1 |  |  |  |  |  | 1 |
| 1585 | *Scutia buxifolia+Prosopis nigra* |  |  | 1 |  |  |  |  |  | 1 |
| 1586 | *Scutia buxifolia+Prosopis nigra+Vachellia caven+Zanthoxylum rhoifolium* |  |  | 1 |  |  |  |  |  | 1 |
| 1587 | *Tessaria integrifolia+Prosopis nigra* |  |  |  |  |  | 1 |  |  | 1 |
| 1588 | *Tessaria integrifolia+Vachellia aroma+Prosopis nigra* |  |  |  |  |  | 1 |  |  | 1 |
| 1589 | *Vachellia caven* |  |  |  | 1 |  |  |  |  | 1 |
| ***Prunus + others*** | |  |  |  |  |  |  |  |  |  |
| 1590 | *Ilex brevicuspis+Ocotea puberula+Aiouea amoena* |  |  |  |  |  |  | 1 |  | 1 |
| 1591 | *Ilex brevicuspis+Parapiptadenia rigida+Prunus brasiliensis+Sebastiania commersoniana* |  |  |  |  |  |  | 1 |  | 1 |
| 1592 | *Prunus brasiliensis* |  |  |  |  |  |  | 1 |  | 1 |
| 1593 | *Prunus brasiliensis+Machaerium stipitatum* |  |  |  |  |  |  | 1 |  | 1 |
| 1594 | *Prunus brasiliensis+Nectandra angustifolia+Bastardiopsis densiflora+Enterolobium contortisiliquum* |  |  |  |  |  |  | 1 |  | 1 |
| 1595 | *Prunus brasiliensis+Symplocos uniflora+Schinus terebinthifolius* |  |  |  |  |  |  | 1 |  | 1 |
| 1596 | *Prunus brasiliensis+Vitex megapotamica+Ruprechtia laxiflora+Parapiptadenia rigida* |  |  |  |  |  |  | 1 |  | 1 |
| 1597 | *Prunus subcoriacea+Luehea divaricata* |  |  |  |  |  |  | 1 |  | 1 |
| ***Rhamnaceae + others*** | |  |  |  |  |  |  |  |  |  |
| 1598 | *Condalia buxifolia* |  |  |  |  |  | 1 |  |  | 1 |
| 1599 | *Condalia buxifolia+Geoffroea decorticans* |  |  |  |  |  | 1 |  |  | 1 |
| 1600 | *Condalia buxifolia+Myrcianthes cisplatensis+Lithraea molleoides* |  |  |  |  |  | 1 |  |  | 1 |
| 1601 | *Condalia buxifolia+Ruprechtia apetala+Senegalia praecox* |  |  |  |  |  | 1 |  |  | 1 |
| 1602 | *Condalia buxifolia+Sapium haematospermum* |  |  |  |  |  | 1 |  |  | 1 |
| 1603 | *Condalia microphylla+Celtis ehrenbergiana+Vachellia astringens* |  |  |  |  |  | 1 |  |  | 1 |
| ***Rubiaceae + others*** | |  |  |  |  |  |  |  |  |  |
| 1604 | *Coutarea hexandra* |  |  |  |  |  |  |  | 1 | 1 |
| ***Salicaceae + others*** | |  |  |  |  |  |  |  |  |  |
| 1605 | *Salix humboldtiana* |  | 4 |  |  |  |  |  |  | 4 |
| 1606 | *Salix humboldtiana+Celtis ehrenbergiana* |  |  |  |  |  | 1 |  |  | 1 |
| 1607 | *Salix humboldtiana+Nectandra angustifolia* |  | 1 |  |  |  |  |  |  | 1 |
| ***Sapindaceae + others*** | |  |  |  |  |  |  |  |  |  |
| 1608 | *Allophylus edulis* |  |  |  |  |  |  |  | 1 | 1 |
| 1609 | *Allophylus edulis+Achatocarpus praecox+Sarcomphalus mistol+Vachellia aroma* |  |  |  |  |  | 1 |  |  | 1 |
| 1610 | *Allophylus edulis+Campomanesia xanthocarpa* |  |  |  |  |  |  | 1 |  | 1 |
| 1611 | *Allophylus edulis+Erythroxylum argentinum* |  |  |  |  |  |  |  | 1 | 1 |
| 1612 | *Allophylus edulis+Myrcianthes pungens+Myrsine laetevirens+Juglans australis* |  |  |  |  |  |  |  | 1 | 1 |
| 1613 | *Allophylus edulis+Parapiptadenia excelsa+Duranta serratifolia+Lithraea molleoides* |  |  |  |  |  | 1 |  |  | 1 |
| 1614 | *Allophylus edulis+Sarcomphalus mistol+Enterolobium contortisiliquum* |  |  |  |  |  | 1 |  |  | 1 |
| 1615 | *Allophylus edulis+Vassobia breviflora* |  |  |  |  |  |  |  | 1 | 1 |
| 1616 | *Athyana weinmanniifolia+Ceiba chodatii+Parapiptadenia excelsa+Ruprechtia apetala* |  |  |  |  |  |  |  | 1 | 1 |
| 1617 | *Athyana weinmanniifolia+Schinopsis lorentzii+Agonandra excelsa+Parapiptadenia excelsa* |  |  |  |  |  |  |  | 1 | 1 |
| 1618 | *Cupania vernalis+Croton piluliferus+Handroanthus lapacho+Urera caracasana* |  |  |  |  |  |  |  | 1 | 1 |
| 1619 | *Cupania vernalis+Holocalyx balansae+Matayba elaeagnoides* |  |  |  |  |  |  | 1 |  | 1 |
| 1620 | *Cupania vernalis+Prunus brasiliensis+Fagara chiloperone* |  |  |  |  |  |  | 1 |  | 1 |
| 1621 | *Cupania vernalis+Solanum riparium* |  |  |  |  |  |  |  | 1 | 1 |
| 1622 | *Diatenopteryx sorbifolia+Anadenanthera colubrina+Handroanthus ochraceus+Ruprechtia laxiflora* |  |  |  |  |  |  |  | 1 | 1 |
| 1623 | *Diatenopteryx sorbifolia+Cordia americana+Parapiptadenia rigida* |  |  |  |  |  |  | 1 |  | 1 |
| 1624 | *Diatenopteryx sorbifolia+Machaerium stipitatum+Cupania vernalis+Nectandra angustifolia* |  |  |  |  |  |  | 1 |  | 1 |
| 1625 | *Diatenopteryx sorbifolia+Nectandra angustifolia+Muellera campestris* |  |  |  |  |  |  | 2 |  | 2 |
| 1626 | *Diatenopteryx sorbifolia+Parapiptadenia rigida+Allophylus edulis* |  |  |  |  |  |  | 1 |  | 1 |
| 1627 | *Diplokeleba floribunda+Gleditsia amorphoides+Handroanthus impetiginosus* |  |  |  |  |  | 1 |  |  | 1 |
| 1628 | *Diplokeleba floribunda+Phyllostylon rhamnoides+Myracrodruon balansae* |  |  |  |  |  | 1 |  |  | 1 |
| 1629 | *Diplokeleba floribunda+Pisonia zapallo+Phyllostylon rhamnoides* |  |  |  |  |  | 1 |  |  | 1 |
| 1630 | *Diplokeleba floribunda+Ruprechtia laxiflora+Scutia buxifolia* |  |  |  |  |  | 1 |  |  | 1 |
| 1631 | *Diplokeleba floribunda+Senegalia praecox+Phyllostylon rhamnoides* |  |  |  |  |  | 1 |  |  | 1 |
| 1632 | *Diplokeleba floribunda+Zanthoxylum petiolare+Phyllostylon rhamnoides* |  |  |  |  |  | 1 |  |  | 1 |
| 1633 | *Matayba elaeagnoides+Nectandra lanceolata+Prunus brasiliensis* |  |  |  |  |  |  | 1 |  | 1 |
| 1634 | *Matayba elaeagnoides+Symplocos uniflora+Nectandra angustifolia* |  |  |  |  |  |  | 1 |  | 1 |
| 1635 | *Sapindus saponaria+Cordia americana+Diplokeleba floribunda* |  |  |  |  |  | 1 |  |  | 1 |
| ***Sapotaceae + others*** | |  |  |  |  |  |  |  |  |  |
| 1636 | *Aralia warmingiana+Chrysophyllum marginatum+Maclura tinctoria* |  |  |  |  |  |  | 1 |  | 1 |
| 1637 | *Chrysophyllum gonocarpum+Bastardiopsis densiflora+Inga uraguensis+Balfourodendron riedelianum* |  |  |  |  |  |  | 1 |  | 1 |
| 1638 | *Chrysophyllum gonocarpum+Jacaratia spinosa+Apuleia leiocarpa* |  |  |  |  |  |  | 1 |  | 1 |
| 1639 | *Chrysophyllum gonocarpum+Ocotea puberula+Anadenanthera colubrina* |  |  |  |  |  |  |  | 1 | 1 |
| 1640 | *Chrysophyllum gonocarpum+Prunus brasiliensis+Balfourodendron riedelianum* |  |  |  |  |  |  | 1 |  | 1 |
| 1641 | *Chrysophyllum marginatum+Bastardiopsis densiflora+Nectandra angustifolia+Vasconcellea quercifolia* |  |  |  |  |  |  | 1 |  | 1 |
| 1642 | *Chrysophyllum marginatum+Nectandra angustifolia+Machaerium stipitatum* |  |  |  |  |  |  | 1 |  | 1 |
| 1643 | *Pouteria salicifolia+Terminalia triflora* |  |  |  |  |  |  | 1 |  | 1 |
| 1644 | *Sideroxylon obtusifolium* |  |  |  |  |  |  |  | 1 | 1 |
| 1645 | *Sideroxylon obtusifolium+Aspidosperma quebracho-blanco+Salta triflora* |  |  |  |  |  | 1 |  |  | 1 |
| 1646 | *Sideroxylon obtusifolium+Aspidosperma quebracho-blanco+Schinopsis lorentzii* |  |  |  |  |  | 1 |  |  | 1 |
| 1647 | *Sideroxylon obtusifolium+Copernicia alba+Scutia buxifolia+Chrysophyllum marginatum* |  |  |  |  |  | 1 |  |  | 1 |
| 1648 | *Sideroxylon obtusifolium+Geoffroea decorticans* |  |  |  |  |  | 1 |  |  | 1 |
| 1649 | *Sideroxylon obtusifolium+Gleditsia amorphoides+Myrcianthes pungens+Ficus luschnathiana* |  |  |  |  |  | 1 |  |  | 1 |
| 1650 | *Sideroxylon obtusifolium+Gleditsia amorphoides+Pisonia zapallo* |  |  |  |  |  | 1 |  |  | 1 |
| 1651 | *Sideroxylon obtusifolium+Libidibia paraguariensis* |  |  |  |  |  | 1 |  |  | 1 |
| 1652 | *Sideroxylon obtusifolium+Libidibia paraguariensis+Cordia americana* |  |  |  |  |  | 1 |  |  | 1 |
| 1653 | *Sideroxylon obtusifolium+Libidibia paraguariensis+Senegalia praecox* |  |  |  |  |  | 1 |  |  | 1 |
| 1654 | *Sideroxylon obtusifolium+Nectandra angustifolia+Luehea divaricata* |  |  |  |  |  |  | 1 |  | 1 |
| 1655 | *Sideroxylon obtusifolium+Parkinsonia praecox+Prosopis kuntzei+Aspidosperma triternatum* |  |  |  |  |  | 1 |  |  | 1 |
| 1656 | *Sideroxylon obtusifolium+Phyllostylon rhamnoides+Tabebuia nodosa* |  |  |  |  |  | 1 |  |  | 1 |
| 1657 | *Sideroxylon obtusifolium+Pisonia zapallo+Ceiba chodatii* |  |  |  |  |  | 1 |  |  | 1 |
| 1658 | *Sideroxylon obtusifolium+Prosopis kuntzei+Gonopterodendron sarmientoi* |  |  |  |  |  | 1 |  |  | 1 |
| 1659 | *Sideroxylon obtusifolium+Prosopis kuntzei+Sarcomphalus mistol+Aspidosperma triternatum* |  |  |  |  |  | 1 |  |  | 1 |
| 1660 | *Sideroxylon obtusifolium+Prosopis kuntzei+Schinopsis lorentzii* |  |  |  |  |  | 1 |  |  | 1 |
| 1661 | *Sideroxylon obtusifolium+Salta triflora* |  |  |  |  |  | 1 |  |  | 1 |
| 1662 | *Sideroxylon obtusifolium+Salta triflora+Aspidosperma quebracho-blanco* |  |  |  |  |  | 1 |  |  | 1 |
| 1663 | *Sideroxylon obtusifolium+Salta triflora+Ceiba chodatii+Tabebuia nodosa* |  |  |  |  |  | 1 |  |  | 1 |
| 1664 | *Sideroxylon obtusifolium+Salta triflora+Schinopsis lorentzii* |  |  |  |  |  | 3 |  |  | 3 |
| 1665 | *Sideroxylon obtusifolium+Sarcomphalus mistol* |  |  |  |  |  | 1 |  |  | 1 |
| 1666 | *Sideroxylon obtusifolium+Schinopsis balansae+Cynophalla retusa+Geoffroea decorticans* |  |  |  |  |  | 1 |  |  | 1 |
| 1667 | *Sideroxylon obtusifolium+Schinopsis lorentzii+Aspidosperma quebracho-blanco* |  |  |  |  |  | 1 |  |  | 1 |
| 1668 | *Sideroxylon obtusifolium+Senegalia praecox* |  |  |  |  |  | 2 |  |  | 2 |
| 1669 | *Sideroxylon obtusifolium+Senegalia praecox+Celtis ehrenbergiana* |  |  |  |  |  | 1 |  |  | 1 |
| 1670 | *Sideroxylon obtusifolium+Senegalia praecox+Salta triflora+Trithrinax campestris* |  |  |  |  |  |  |  | 1 | 1 |
| 1671 | *Sideroxylon obtusifolium+Senegalia praecox+Ximenia americana* |  |  |  |  |  | 1 |  |  | 1 |
| 1672 | *Sideroxylon obtusifolium+Tabebuia nodosa+Senegalia praecox* |  |  |  |  |  | 1 |  |  | 1 |
| 1673 | *Sideroxylon obtusifolium+Trithrinax schizophylla var. biflabellata+Senegalia praecox* |  |  |  |  |  | 1 |  |  | 1 |
| ***Sarcomphalus mistol + others*** | |  |  |  |  |  |  |  |  |  |
| 1674 | *Bougainvillea praecox+Sarcomphalus mistol+Gonopterodendron sarmientoi* |  |  |  |  |  | 1 |  |  | 1 |
| 1675 | *Sarcomphalus mistol* |  |  |  |  |  | 16 |  |  | 16 |
| 1676 | *Sarcomphalus mistol+Achatocarpus praecox+Schinopsis lorentzii* |  |  |  |  |  | 1 |  |  | 1 |
| 1677 | *Sarcomphalus mistol+Anisocapparis speciosa+Aspidosperma quebracho-blanco* |  |  |  |  |  | 1 |  |  | 1 |
| 1678 | *Sarcomphalus mistol+Anisocapparis speciosa+Prosopis ruscifolia* |  |  |  |  |  | 1 |  |  | 1 |
| 1679 | *Sarcomphalus mistol+Aspidosperma quebracho-blanco+Castela coccinea+Prosopis nigra* |  |  |  |  |  | 1 |  |  | 1 |
| 1680 | *Sarcomphalus mistol+Aspidosperma quebracho-blanco+Ceiba chodatii+Sideroxylon obtusifolium* |  |  |  |  |  | 1 |  |  | 1 |
| 1681 | *Sarcomphalus mistol+Aspidosperma quebracho-blanco+Libidibia paraguariensis* |  |  |  |  |  | 1 |  |  | 1 |
| 1682 | *Sarcomphalus mistol+Aspidosperma quebracho-blanco+Mimozyganthus carinatus* |  |  |  |  |  | 2 |  |  | 2 |
| 1683 | *Sarcomphalus mistol+Aspidosperma quebracho-blanco+Parkinsonia praecox+Prosopis torquata* |  |  |  |  |  | 1 |  |  | 1 |
| 1684 | *Sarcomphalus mistol+Aspidosperma quebracho-blanco+Prosopis nigra* |  |  |  |  |  | 5 |  |  | 5 |
| 1685 | *Sarcomphalus mistol+Aspidosperma quebracho-blanco+Prosopis nigra+Schinopsis lorentzii* |  |  |  |  |  | 1 |  |  | 1 |
| 1686 | *Sarcomphalus mistol+Aspidosperma quebracho-blanco+Schinopsis lorentzii* |  |  |  |  |  | 15 |  |  | 15 |
| 1687 | *Sarcomphalus mistol+Aspidosperma quebracho-blanco+Schinopsis lorentzii+Bougainvillea praecox* |  |  |  |  |  | 1 |  |  | 1 |
| 1688 | *Sarcomphalus mistol+Aspidosperma quebracho-blanco+Schinopsis lorentzii+Senegalia praecox* |  |  |  |  |  | 1 |  |  | 1 |
| 1689 | *Sarcomphalus mistol+Aspidosperma quebracho-blanco+Schinus longifolius* |  |  |  |  |  | 1 |  |  | 1 |
| 1690 | *Sarcomphalus mistol+Aspidosperma quebracho-blanco+Schinus molle* |  |  |  |  |  | 1 |  |  | 1 |
| 1691 | *Sarcomphalus mistol+Aspidosperma quebracho-blanco+Senegalia gilliesii* |  |  |  |  |  | 1 |  |  | 1 |
| 1692 | *Sarcomphalus mistol+Aspidosperma quebracho-blanco+Senegalia praecox* |  |  |  |  |  | 4 |  |  | 4 |
| 1693 | *Sarcomphalus mistol+Aspidosperma quebracho-blanco+Senegalia praecox+Schinopsis lorentzii* |  |  |  |  |  | 1 |  |  | 1 |
| 1694 | *Sarcomphalus mistol+Aspidosperma quebracho-blanco+Sideroxylon obtusifolium* |  |  |  |  |  | 1 |  |  | 1 |
| 1695 | *Sarcomphalus mistol+Bougainvillea campanulata* |  |  |  |  |  | 1 |  |  | 1 |
| 1696 | *Sarcomphalus mistol+Bougainvillea praecox+Mimozyganthus carinatus* |  |  |  |  |  | 1 |  |  | 1 |
| 1697 | *Sarcomphalus mistol+Bougainvillea stipitata* |  |  |  |  |  | 1 |  |  | 1 |
| 1698 | *Sarcomphalus mistol+Castela coccinea+Prosopis alba* |  |  |  |  |  | 1 |  |  | 1 |
| 1699 | *Sarcomphalus mistol+Celtis iguanaea+Achatocarpus praecox* |  |  |  |  |  | 1 |  |  | 1 |
| 1700 | *Sarcomphalus mistol+Geoffroea decorticans* |  |  |  |  |  | 2 |  |  | 2 |
| 1701 | *Sarcomphalus mistol+Geoffroea decorticans+Aspidosperma quebracho-blanco* |  |  |  |  |  | 1 |  |  | 1 |
| 1702 | *Sarcomphalus mistol+Gonopterodendron sarmientoi* |  |  |  |  |  | 2 |  |  | 2 |
| 1703 | *Sarcomphalus mistol+Gonopterodendron sarmientoi+Aspidosperma quebracho-blanco* |  |  |  |  |  | 1 |  |  | 1 |
| 1704 | *Sarcomphalus mistol+Gonopterodendron sarmientoi+Schinopsis lorentzii* |  |  |  |  |  | 1 |  |  | 1 |
| 1705 | *Sarcomphalus mistol+Gonopterodendron sarmientoi+Schinopsis lorentzii+Libidibia paraguariensis* |  |  |  |  |  | 1 |  |  | 1 |
| 1706 | *Sarcomphalus mistol+Handroanthus impetiginosus* |  |  |  |  |  | 1 |  |  | 1 |
| 1707 | *Sarcomphalus mistol+Libidibia paraguariensis* |  |  |  |  |  | 1 |  |  | 1 |
| 1708 | *Sarcomphalus mistol+Libidibia paraguariensis+Aspidosperma quebracho-blanco* |  |  |  |  |  | 1 |  |  | 1 |
| 1709 | *Sarcomphalus mistol+Libidibia paraguariensis+Schinopsis lorentzii* |  |  |  |  |  | 1 |  |  | 1 |
| 1710 | *Sarcomphalus mistol+Libidibia paraguariensis+Tabebuia nodosa* |  |  |  |  |  | 1 |  |  | 1 |
| 1711 | *Sarcomphalus mistol+Maytenus vitis-idaea* |  |  |  |  |  | 1 |  |  | 1 |
| 1712 | *Sarcomphalus mistol+Parkinsonia praecox* |  |  |  |  |  | 1 |  |  | 1 |
| 1713 | *Sarcomphalus mistol+Parkinsonia praecox+Prosopis nigra* |  |  |  |  |  | 2 |  |  | 2 |
| 1714 | *Sarcomphalus mistol+Parkinsonia praecox+Prosopis nigra+Celtis ehrenbergiana* |  |  |  |  |  | 1 |  |  | 1 |
| 1715 | *Sarcomphalus mistol+Parkinsonia praecox+Salta triflora* |  |  |  |  |  | 1 |  |  | 1 |
| 1716 | *Sarcomphalus mistol+Pisonia zapallo+Achatocarpus praecox* |  |  |  |  |  | 1 |  |  | 1 |
| 1717 | *Sarcomphalus mistol+Prosopis alba* |  |  |  |  |  | 3 |  |  | 3 |
| 1718 | *Sarcomphalus mistol+Prosopis alba+Aspidosperma quebracho-blanco+Prosopis vinalillo* |  |  |  |  |  | 1 |  |  | 1 |
| 1719 | *Sarcomphalus mistol+Prosopis alba+Gonopterodendron sarmientoi* |  |  |  |  |  | 1 |  |  | 1 |
| 1720 | *Sarcomphalus mistol+Prosopis alba+Prosopis elata+Aspidosperma quebracho-blanco* |  |  |  |  |  | 1 |  |  | 1 |
| 1721 | *Sarcomphalus mistol+Prosopis alba+Senegalia gilliesii+Prosopis torquata* |  |  |  |  |  | 1 |  |  | 1 |
| 1722 | *Sarcomphalus mistol+Prosopis elata* |  |  |  |  |  | 1 |  |  | 1 |
| 1723 | *Sarcomphalus mistol+Prosopis elata+Salta triflora* |  |  |  |  |  | 1 |  |  | 1 |
| 1724 | *Sarcomphalus mistol+Prosopis flexuosa+Aspidosperma quebracho-blanco* |  |  |  |  |  | 1 |  |  | 1 |
| 1725 | *Sarcomphalus mistol+Prosopis kuntzei+Libidibia paraguariensis* |  |  |  |  |  | 1 |  |  | 1 |
| 1726 | *Sarcomphalus mistol+Prosopis kuntzei+Schinopsis lorentzii* |  |  |  |  |  | 1 |  |  | 1 |
| 1727 | *Sarcomphalus mistol+Prosopis kuntzei+Senegalia praecox* |  |  |  |  |  | 1 |  |  | 1 |
| 1728 | *Sarcomphalus mistol+Prosopis kuntzei+Senegalia praecox+Senegalia gilliesii* |  |  |  |  |  | 1 |  |  | 1 |
| 1729 | *Sarcomphalus mistol+Prosopis nigra* |  |  |  |  |  | 16 |  |  | 16 |
| 1730 | *Sarcomphalus mistol+Prosopis nigra+Aspidosperma quebracho-blanco* |  |  |  |  |  | 3 |  |  | 3 |
| 1731 | *Sarcomphalus mistol+Prosopis nigra+Aspidosperma quebracho-blanco+Prosopis kuntzei* |  |  |  |  |  | 1 |  |  | 1 |
| 1732 | *Sarcomphalus mistol+Prosopis nigra+Aspidosperma quebracho-blanco+Senegalia praecox* |  |  |  |  |  | 1 |  |  | 1 |
| 1733 | *Sarcomphalus mistol+Prosopis nigra+Castela coccinea* |  |  |  |  |  | 1 |  |  | 1 |
| 1734 | *Sarcomphalus mistol+Prosopis nigra+Cynophalla retusa* |  |  |  |  |  | 1 |  |  | 1 |
| 1735 | *Sarcomphalus mistol+Prosopis nigra+Parkinsonia praecox* |  |  |  |  |  | 1 |  |  | 1 |
| 1736 | *Sarcomphalus mistol+Prosopis nigra+Parkinsonia praecox+Tabebuia nodosa* |  |  |  |  |  | 1 |  |  | 1 |
| 1737 | *Sarcomphalus mistol+Prosopis nigra+Schinopsis lorentzii* |  |  |  |  |  | 2 |  |  | 2 |
| 1738 | *Sarcomphalus mistol+Prosopis nigra+Senegalia gilliesii* |  |  |  |  |  | 1 |  |  | 1 |
| 1739 | *Sarcomphalus mistol+Prosopis nigra+Senegalia praecox+Schinopsis lorentzii* |  |  |  |  |  | 1 |  |  | 1 |
| 1740 | *Sarcomphalus mistol+Prosopis nigra+Sideroxylon obtusifolium+Aspidosperma quebracho-blanco* |  |  |  |  |  | 1 |  |  | 1 |
| 1741 | *Sarcomphalus mistol+Prosopis nigra+Vachellia aroma* |  |  |  |  |  | 2 |  |  | 2 |
| 1742 | *Sarcomphalus mistol+Prosopis ruscifolia* |  |  |  |  |  | 4 |  |  | 4 |
| 1743 | *Sarcomphalus mistol+Prosopis ruscifolia+Parkinsonia praecox+Aspidosperma quebracho-blanco* |  |  |  |  |  | 1 |  |  | 1 |
| 1744 | *Sarcomphalus mistol+Prosopis ruscifolia+Prosopis alba* |  |  |  |  |  | 1 |  |  | 1 |
| 1745 | *Sarcomphalus mistol+Prosopis ruscifolia+Prosopis nigra* |  |  |  |  |  | 1 |  |  | 1 |
| 1746 | *Sarcomphalus mistol+Prosopis ruscifolia+Sideroxylon obtusifolium+Prosopis vinalillo* |  |  |  |  |  | 1 |  |  | 1 |
| 1747 | *Sarcomphalus mistol+Prosopis torquata* |  |  |  |  |  | 1 |  |  | 1 |
| 1748 | *Sarcomphalus mistol+Ruprechtia apetala+Bougainvillea praecox* |  |  |  |  |  | 1 |  |  | 1 |
| 1749 | *Sarcomphalus mistol+Salta triflora* |  |  |  |  |  | 3 |  |  | 3 |
| 1750 | *Sarcomphalus mistol+Salta triflora+Aspidosperma quebracho-blanco* |  |  |  |  |  | 2 |  |  | 2 |
| 1751 | *Sarcomphalus mistol+Salta triflora+Aspidosperma quebracho-blanco+Schinopsis lorentzii* |  |  |  |  |  | 2 |  |  | 2 |
| 1752 | *Sarcomphalus mistol+Salta triflora+Aspidosperma quebracho-blanco+Tabebuia nodosa* |  |  |  |  |  | 1 |  |  | 1 |
| 1753 | *Sarcomphalus mistol+Salta triflora+Gonopterodendron sarmientoi* |  |  |  |  |  | 1 |  |  | 1 |
| 1754 | *Sarcomphalus mistol+Salta triflora+Libidibia paraguariensis* |  |  |  |  |  | 3 |  |  | 3 |
| 1755 | *Sarcomphalus mistol+Salta triflora+Prosopis alba* |  |  |  |  |  | 3 |  |  | 3 |
| 1756 | *Sarcomphalus mistol+Salta triflora+Pterogyne nitens* |  |  |  |  |  | 1 |  |  | 1 |
| 1757 | *Sarcomphalus mistol+Salta triflora+Schinopsis lorentzii* |  |  |  |  |  | 3 |  |  | 3 |
| 1758 | *Sarcomphalus mistol+Salta triflora+Schinopsis lorentzii+Aspidosperma quebracho-blanco* |  |  |  |  |  | 1 |  |  | 1 |
| 1759 | *Sarcomphalus mistol+Salta triflora+Schinopsis lorentzii+Sideroxylon obtusifolium* |  |  |  |  |  | 1 |  |  | 1 |
| 1760 | *Sarcomphalus mistol+Salta triflora+Senegalia praecox* |  |  |  |  |  | 1 |  |  | 1 |
| 1761 | *Sarcomphalus mistol+Salta triflora+Tabebuia nodosa* |  |  |  |  |  | 2 |  |  | 2 |
| 1762 | *Sarcomphalus mistol+Schinopsis lorentzii* |  |  |  |  |  | 25 |  |  | 25 |
| 1763 | *Sarcomphalus mistol+Schinopsis lorentzii+Aspidosperma quebracho-blanco* |  |  |  |  |  | 10 |  |  | 10 |
| 1764 | *Sarcomphalus mistol+Schinopsis lorentzii+Aspidosperma quebracho-blanco+Anisocapparis speciosa* |  |  |  |  |  | 1 |  |  | 1 |
| 1765 | *Sarcomphalus mistol+Schinopsis lorentzii+Ceiba chodatii+Senegalia praecox* |  |  |  |  |  | 1 |  |  | 1 |
| 1766 | *Sarcomphalus mistol+Schinopsis lorentzii+Libidibia paraguariensis* |  |  |  |  |  | 1 |  |  | 1 |
| 1767 | *Sarcomphalus mistol+Schinopsis lorentzii+Salta triflora* |  |  |  |  |  | 5 |  |  | 5 |
| 1768 | *Sarcomphalus mistol+Schinopsis lorentzii+Salta triflora+Aspidosperma quebracho-blanco* |  |  |  |  |  | 1 |  |  | 1 |
| 1769 | *Sarcomphalus mistol+Schinopsis lorentzii+Senegalia praecox* |  |  |  |  |  | 2 |  |  | 2 |
| 1770 | *Sarcomphalus mistol+Schinopsis lorentzii+Sideroxylon obtusifolium* |  |  |  |  |  | 1 |  |  | 1 |
| 1771 | *Sarcomphalus mistol+Schinopsis lorentzii+Sideroxylon obtusifolium+Aspidosperma quebracho-blanco* |  |  |  |  |  | 1 |  |  | 1 |
| 1772 | *Sarcomphalus mistol+Schinopsis lorentzii+Ximenia americana* |  |  |  |  |  | 1 |  |  | 1 |
| 1773 | *Sarcomphalus mistol+Schinus longifolius* |  |  |  |  |  | 4 |  |  | 4 |
| 1774 | *Sarcomphalus mistol+Schinus longifolius+Aspidosperma quebracho-blanco+Prosopis nigra* |  |  |  |  |  | 1 |  |  | 1 |
| 1775 | *Sarcomphalus mistol+Senegalia gilliesii+Prosopis nigra* |  |  |  |  |  | 2 |  |  | 2 |
| 1776 | *Sarcomphalus mistol+Senegalia gilliesii+Schinopsis lorentzii* |  |  |  |  |  | 2 |  |  | 2 |
| 1777 | *Sarcomphalus mistol+Senegalia praecox* |  |  |  |  |  | 4 |  |  | 4 |
| 1778 | *Sarcomphalus mistol+Senegalia praecox+Aspidosperma quebracho-blanco* |  |  |  |  |  | 3 |  |  | 3 |
| 1779 | *Sarcomphalus mistol+Senegalia praecox+Cynophalla retusa+Schinopsis lorentzii* |  |  |  |  |  | 1 |  |  | 1 |
| 1780 | *Sarcomphalus mistol+Senegalia praecox+Prosopis kuntzei* |  |  |  |  |  | 1 |  |  | 1 |
| 1781 | *Sarcomphalus mistol+Senegalia praecox+Prosopis nigra* |  |  |  |  |  | 1 |  |  | 1 |
| 1782 | *Sarcomphalus mistol+Sideroxylon obtusifolium* |  |  |  |  |  | 2 |  |  | 2 |
| 1783 | *Sarcomphalus mistol+Sideroxylon obtusifolium+Schinopsis balansae* |  |  |  |  |  | 1 |  |  | 1 |
| 1784 | *Sarcomphalus mistol+Sideroxylon obtusifolium+Schinopsis balansae+Salta triflora* |  |  |  |  |  | 1 |  |  | 1 |
| 1785 | *Sarcomphalus mistol+Tabebuia nodosa+Aspidosperma quebracho-blanco* |  |  |  |  |  | 1 |  |  | 1 |
| 1786 | *Sarcomphalus mistol+Tabebuia nodosa+Gonopterodendron sarmientoi* |  |  |  |  |  | 1 |  |  | 1 |
| 1787 | *Sarcomphalus mistol+Tabebuia nodosa+Prosopis nigra* |  |  |  |  |  | 1 |  |  | 1 |
| 1788 | *Sarcomphalus mistol+Trithrinax schizophylla var. biflabellata+Schinopsis balansae* |  |  |  |  |  | 1 |  |  | 1 |
| 1789 | *Sarcomphalus mistol+Trithrinax schyzophylla var. schyzophylla+Sideroxylon obtusifolium+Senegalia praecox* |  |  |  |  |  | 1 |  |  | 1 |
| 1790 | *Sarcomphalus mistol+Vachellia aroma* |  |  |  |  |  | 4 |  |  | 4 |
| 1791 | *Sarcomphalus mistol+Vachellia caven+Aspidosperma quebracho-blanco+Prosopis alba* |  |  |  |  |  | 1 |  |  | 1 |
| 1792 | *Sarcomphalus mistol+Ximenia americana+Schinopsis lorentzii+Sarcotoxicum salicifolium* |  |  |  |  |  | 1 |  |  | 1 |
| ***Schinopsis + others*** | |  |  |  |  |  |  |  |  |  |
| 1793 | *Achatocarpus praecox+Schinopsis balansae+Pisonia zapallo+Salta triflora* |  |  |  |  |  | 1 |  |  | 1 |
| 1794 | *Bougainvillea praecox+Schinopsis lorentzii+Sarcomphalus mistol+Tabebuia nodosa* |  |  |  |  |  | 1 |  |  | 1 |
| 1795 | *Maytenus viscifolia+Schinopsis lorentzii* |  |  |  |  |  | 1 |  |  | 1 |
| 1796 | *Schinopsis balansae* |  |  |  |  |  | 2 |  |  | 2 |
| 1797 | *Schinopsis balansae+Acanthosyris falcata+Cordia americana* |  |  |  |  |  | 1 |  |  | 1 |
| 1798 | *Schinopsis balansae+Aspidosperma quebracho-blanco* |  |  |  |  |  | 1 |  |  | 1 |
| 1799 | *Schinopsis balansae+Aspidosperma quebracho-blanco+Cordia americana+Sideroxylon obtusifolium* |  |  |  |  |  | 1 |  |  | 1 |
| 1800 | *Schinopsis balansae+Cordia americana+Anadenanthera colubrina* |  |  |  |  |  |  |  | 1 | 1 |
| 1801 | *Schinopsis balansae+Cordia americana+Gleditsia amorphoides+Senegalia praecox* |  |  |  |  |  | 1 |  |  | 1 |
| 1802 | *Schinopsis balansae+Cordia americana+Prosopis nigra* |  |  |  |  |  | 1 |  |  | 1 |
| 1803 | *Schinopsis balansae+Gleditsia amorphoides+Myrcianthes cisplatensis* |  |  |  |  |  | 1 |  |  | 1 |
| 1804 | *Schinopsis balansae+Gleditsia amorphoides+Prosopis alba* |  |  |  |  |  | 1 |  |  | 1 |
| 1805 | *Schinopsis balansae+Gleditsia amorphoides+Tabebuia nodosa* |  |  |  |  |  | 1 |  |  | 1 |
| 1806 | *Schinopsis balansae+Libidibia paraguariensis* |  |  |  |  |  | 1 |  |  | 1 |
| 1807 | *Schinopsis balansae+Libidibia paraguariensis+Prosopis nigra+Tabebuia nodosa* |  |  |  |  |  | 1 |  |  | 1 |
| 1808 | *Schinopsis balansae+Libidibia paraguariensis+Senegalia praecox* |  |  |  |  |  | 1 |  |  | 1 |
| 1809 | *Schinopsis balansae+Pisonia zapallo+Tabebuia nodosa+Prosopis nigra* |  |  |  |  |  | 1 |  |  | 1 |
| 1810 | *Schinopsis balansae+Prosopis affinis+Sideroxylon obtusifolium* |  |  |  |  |  | 2 |  |  | 2 |
| 1811 | *Schinopsis balansae+Prosopis alba* |  |  |  |  |  | 2 |  |  | 2 |
| 1812 | *Schinopsis balansae+Prosopis alba+Diplokeleba floribunda+Aspidosperma quebracho-blanco* |  |  |  |  |  | 1 |  |  | 1 |
| 1813 | *Schinopsis balansae+Prosopis alba+Myrcianthes cisplatensis* |  |  |  |  |  | 1 |  |  | 1 |
| 1814 | *Schinopsis balansae+Prosopis alba+Senegalia praecox* |  |  |  |  |  | 1 |  |  | 1 |
| 1815 | *Schinopsis balansae+Prosopis kuntzei* |  |  |  |  |  | 2 |  |  | 2 |
| 1816 | *Schinopsis balansae+Prosopis nigra* |  |  |  |  |  | 1 |  |  | 1 |
| 1817 | *Schinopsis balansae+Prosopis nigra+Diplokeleba floribunda* |  |  |  |  |  | 1 |  |  | 1 |
| 1818 | *Schinopsis balansae+Prosopis nigra+Prosopis kuntzei* |  |  |  |  |  | 1 |  |  | 1 |
| 1819 | *Schinopsis balansae+Prosopis nigra+Ruprechtia laxiflora* |  |  |  |  |  | 1 |  |  | 1 |
| 1820 | *Schinopsis balansae+Ruprechtia laxiflora* |  |  |  |  |  | 1 |  |  | 1 |
| 1821 | *Schinopsis balansae+Ruprechtia laxiflora+Cordia americana* |  |  |  |  |  | 1 |  |  | 1 |
| 1822 | *Schinopsis balansae+Ruprechtia laxiflora+Prosopis alba* |  |  |  |  |  | 1 |  |  | 1 |
| 1823 | *Schinopsis balansae+Sarcomphalus mistol* |  |  |  |  |  | 1 |  |  | 1 |
| 1824 | *Schinopsis balansae+Sarcomphalus mistol+Prosopis nigra+Cynophalla retusa* |  |  |  |  |  | 1 |  |  | 1 |
| 1825 | *Schinopsis balansae+Sarcomphalus mistol+Prosopis ruscifolia+Copernicia alba* |  |  |  |  |  | 1 |  |  | 1 |
| 1826 | *Schinopsis balansae+Schinus fasciculatus+Achatocarpus praecox* |  |  |  |  |  | 1 |  |  | 1 |
| 1827 | *Schinopsis balansae+Senegalia praecox* |  |  |  |  |  | 1 |  |  | 1 |
| 1828 | *Schinopsis balansae+Senegalia praecox+Ceiba chodatii* |  |  |  |  |  | 1 |  |  | 1 |
| 1829 | *Schinopsis balansae+Senegalia praecox+Cordia americana+Aspidosperma quebracho-blanco* |  |  |  |  |  | 1 |  |  | 1 |
| 1830 | *Schinopsis balansae+Senegalia praecox+Cordia americana+Myracrodruon balansae* |  |  |  |  |  | 1 |  |  | 1 |
| 1831 | *Schinopsis balansae+Senegalia praecox+Cordia americana+Prosopis ruscifolia* |  |  |  |  |  | 1 |  |  | 1 |
| 1832 | *Schinopsis balansae+Senegalia praecox+Pisonia zapallo* |  |  |  |  |  | 1 |  |  | 1 |
| 1833 | *Schinopsis balansae+Senegalia praecox+Schinus longifolius* |  |  |  |  |  | 1 |  |  | 1 |
| 1834 | *Schinopsis balansae+Senegalia praecox+Trithrinax schyzophylla var. schyzophylla+Prosopis ruscifolia* |  |  |  |  |  | 1 |  |  | 1 |
| 1835 | *Schinopsis balansae+Sideroxylon obtusifolium* |  |  |  |  |  | 1 |  |  | 1 |
| 1836 | *Schinopsis balansae+Sideroxylon obtusifolium+Cordia americana* |  |  |  |  |  | 1 |  |  | 1 |
| 1837 | *Schinopsis balansae+Tabebuia nodosa* |  |  |  |  |  | 2 |  |  | 2 |
| 1838 | *Schinopsis balansae+Tabebuia nodosa+Prosopis nigra* |  |  |  |  |  | 1 |  |  | 1 |
| 1839 | *Schinopsis balansae+Tabebuia nodosa+Ruprechtia laxiflora+Microlobius foetidus* |  |  |  |  |  | 1 |  |  | 1 |
| 1840 | *Schinopsis balansae+Tabebuia nodosa+Salta triflora* |  |  |  |  |  | 1 |  |  | 1 |
| 1841 | *Schinopsis balansae+Tabebuia nodosa+Sarcomphalus mistol+Prosopis alba* |  |  |  |  |  | 1 |  |  | 1 |
| 1842 | *Schinopsis lorentzii* |  |  |  |  |  | 24 |  |  | 24 |
| 1843 | *Schinopsis lorentzii+Anadenanthera colubrina* |  |  |  |  |  | 1 |  |  | 1 |
| 1844 | *Schinopsis lorentzii+Anadenanthera colubrina+Parapiptadenia excelsa+Pisonia zapallo* |  |  |  |  |  |  |  | 1 | 1 |
| 1845 | *Schinopsis lorentzii+Anadenanthera colubrina+Salta triflora+Agonandra excelsa* |  |  |  |  |  |  |  | 1 | 1 |
| 1846 | *Schinopsis lorentzii+Aralia soratensis* |  |  |  |  |  |  |  | 1 | 1 |
| 1847 | *Schinopsis lorentzii+Aspidosperma quebracho-blanco* |  |  |  |  |  | 34 |  | 1 | 35 |
| 1848 | *Schinopsis lorentzii+Aspidosperma quebracho-blanco+Bougainvillea praecox* |  |  |  |  |  | 1 |  |  | 1 |
| 1849 | *Schinopsis lorentzii+Aspidosperma quebracho-blanco+Castela coccinea* |  |  |  |  |  | 1 |  |  | 1 |
| 1850 | *Schinopsis lorentzii+Aspidosperma quebracho-blanco+Libidibia paraguariensis* |  |  |  |  |  | 2 |  |  | 2 |
| 1851 | *Schinopsis lorentzii+Aspidosperma quebracho-blanco+Libidibia paraguariensis+Trithrinax schyzophylla var. schyzophylla* |  |  |  |  |  | 1 |  |  | 1 |
| 1852 | *Schinopsis lorentzii+Aspidosperma quebracho-blanco+Parkinsonia praecox* |  |  |  |  |  | 2 |  |  | 2 |
| 1853 | *Schinopsis lorentzii+Aspidosperma quebracho-blanco+Prosopis nigra* |  |  |  |  |  | 4 |  |  | 4 |
| 1854 | *Schinopsis lorentzii+Aspidosperma quebracho-blanco+Prosopis nigra+Prosopis kuntzei* |  |  |  |  |  | 1 |  |  | 1 |
| 1855 | *Schinopsis lorentzii+Aspidosperma quebracho-blanco+Salta triflora* |  |  |  |  |  | 3 |  |  | 3 |
| 1856 | *Schinopsis lorentzii+Aspidosperma quebracho-blanco+Salta triflora+Sarcomphalus mistol* |  |  |  |  |  | 2 |  |  | 2 |
| 1857 | *Schinopsis lorentzii+Aspidosperma quebracho-blanco+Salta triflora+Tabebuia nodosa* |  |  |  |  |  | 1 |  |  | 1 |
| 1858 | *Schinopsis lorentzii+Aspidosperma quebracho-blanco+Sarcomphalus mistol* |  |  |  |  |  | 12 |  |  | 12 |
| 1859 | *Schinopsis lorentzii+Aspidosperma quebracho-blanco+Sarcomphalus mistol+Senegalia praecox* |  |  |  |  |  | 1 |  |  | 1 |
| 1860 | *Schinopsis lorentzii+Aspidosperma quebracho-blanco+Senegalia gilliesii* |  |  |  |  |  | 1 |  |  | 1 |
| 1861 | *Schinopsis lorentzii+Aspidosperma quebracho-blanco+Sideroxylon obtusifolium* |  |  |  |  |  | 1 |  |  | 1 |
| 1862 | *Schinopsis lorentzii+Aspidosperma quebracho-blanco+Vachellia aroma* |  |  |  |  |  | 1 |  |  | 1 |
| 1863 | *Schinopsis lorentzii+Aspidosperma quebracho-blanco+Ximenia americana* |  |  |  |  |  | 1 |  |  | 1 |
| 1864 | *Schinopsis lorentzii+Aspidosperma quebracho-blanco+Ximenia americana+Tabebuia nodosa* |  |  |  |  |  | 1 |  |  | 1 |
| 1865 | *Schinopsis lorentzii+Bougainvillea stipitata+Aspidosperma quebracho-blanco+Salta triflora* |  |  |  |  |  | 1 |  |  | 1 |
| 1866 | *Schinopsis lorentzii+Ceiba chodatii+Blepharocalyx salicifolius+Parapiptadenia excelsa* |  |  |  |  |  |  |  | 1 | 1 |
| 1867 | *Schinopsis lorentzii+Celtis ehrenbergiana+Geoffroea decorticans* |  |  |  |  |  | 1 |  |  | 1 |
| 1868 | *Schinopsis lorentzii+Cordia americana+Senegalia praecox* |  |  |  |  |  | 1 |  |  | 1 |
| 1869 | *Schinopsis lorentzii+Cybistax antisyphilitica+Ruprechtia laxiflora* |  |  |  |  |  | 1 |  |  | 1 |
| 1870 | *Schinopsis lorentzii+Cynophalla retusa+Sarcomphalus mistol+Prosopis ruscifolia* |  |  |  |  |  | 1 |  |  | 1 |
| 1871 | *Schinopsis lorentzii+Libidibia paraguariensis* |  |  |  |  |  | 5 |  | 1 | 6 |
| 1872 | *Schinopsis lorentzii+Libidibia paraguariensis+Aspidosperma quebracho-blanco* |  |  |  |  |  | 2 |  |  | 2 |
| 1873 | *Schinopsis lorentzii+Libidibia paraguariensis+Aspidosperma quebracho-blanco+Ruprechtia apetala* |  |  |  |  |  | 1 |  |  | 1 |
| 1874 | *Schinopsis lorentzii+Libidibia paraguariensis+Ceiba chodatii* |  |  |  |  |  | 1 |  |  | 1 |
| 1875 | *Schinopsis lorentzii+Libidibia paraguariensis+Ruprechtia apetala* |  |  |  |  |  | 1 |  |  | 1 |
| 1876 | *Schinopsis lorentzii+Libidibia paraguariensis+Sarcomphalus mistol* |  |  |  |  |  | 1 |  |  | 1 |
| 1877 | *Schinopsis lorentzii+Maytenus viscifolia+Libidibia paraguariensis* |  |  |  |  |  | 1 |  |  | 1 |
| 1878 | *Schinopsis lorentzii+Ocotea porphyria+Anadenanthera colubrina* |  |  |  |  |  |  |  | 1 | 1 |
| 1879 | *Schinopsis lorentzii+Parapiptadenia excelsa* |  |  |  |  |  | 1 |  | 1 | 2 |
| 1880 | *Schinopsis lorentzii+Parapiptadenia excelsa+Gleditsia amorphoides* |  |  |  |  |  |  |  | 1 | 1 |
| 1881 | *Schinopsis lorentzii+Parapiptadenia excelsa+Tipuana tipu+Phyllostylon rhamnoides* |  |  |  |  |  |  |  | 1 | 1 |
| 1882 | *Schinopsis lorentzii+Parkinsonia praecox+Aspidosperma quebracho-blanco* |  |  |  |  |  | 1 |  |  | 1 |
| 1883 | *Schinopsis lorentzii+Parkinsonia praecox+Senegalia praecox* |  |  |  |  |  | 1 |  |  | 1 |
| 1884 | *Schinopsis lorentzii+Parkinsonia praecox+Tabebuia nodosa* |  |  |  |  |  | 1 |  |  | 1 |
| 1885 | *Schinopsis lorentzii+Phyllostylon rhamnoides+Anadenanthera colubrina* |  |  |  |  |  |  |  | 1 | 1 |
| 1886 | *Schinopsis lorentzii+Prosopis alba+Sarcomphalus mistol* |  |  |  |  |  | 1 |  |  | 1 |
| 1887 | *Schinopsis lorentzii+Prosopis kuntzei* |  |  |  |  |  | 1 |  |  | 1 |
| 1888 | *Schinopsis lorentzii+Prosopis kuntzei+Aspidosperma quebracho-blanco* |  |  |  |  |  | 1 |  |  | 1 |
| 1889 | *Schinopsis lorentzii+Prosopis kuntzei+Sarcomphalus mistol* |  |  |  |  |  | 1 |  |  | 1 |
| 1890 | *Schinopsis lorentzii+Prosopis nigra* |  |  |  |  |  | 2 |  |  | 2 |
| 1891 | *Schinopsis lorentzii+Prosopis nigra+Aspidosperma quebracho-blanco* |  |  |  |  |  | 2 |  |  | 2 |
| 1892 | *Schinopsis lorentzii+Prosopis nigra+Parkinsonia praecox* |  |  |  |  |  | 1 |  |  | 1 |
| 1893 | *Schinopsis lorentzii+Prosopis torquata+Senegalia gilliesii+Aspidosperma quebracho-blanco* |  |  |  |  |  | 1 |  |  | 1 |
| 1894 | *Schinopsis lorentzii+Ruprechtia apetala* |  |  |  |  |  | 1 |  |  | 1 |
| 1895 | *Schinopsis lorentzii+Ruprechtia apetala+Achatocarpus praecox* |  |  |  |  |  | 1 |  |  | 1 |
| 1896 | *Schinopsis lorentzii+Salta triflora* |  |  |  |  |  | 1 |  |  | 1 |
| 1897 | *Schinopsis lorentzii+Salta triflora+Aspidosperma quebracho-blanco* |  |  |  |  |  | 4 |  |  | 4 |
| 1898 | *Schinopsis lorentzii+Salta triflora+Aspidosperma quebracho-blanco+Prosopis torquata* |  |  |  |  |  | 1 |  |  | 1 |
| 1899 | *Schinopsis lorentzii+Salta triflora+Calycophyllum multiflorum* |  |  |  |  |  | 1 |  |  | 1 |
| 1900 | *Schinopsis lorentzii+Salta triflora+Sarcomphalus mistol* |  |  |  |  |  | 1 |  |  | 1 |
| 1901 | *Schinopsis lorentzii+Salta triflora+Tabebuia nodosa* |  |  |  |  |  | 2 |  |  | 2 |
| 1902 | *Schinopsis lorentzii+Sarcomphalus mistol* |  |  |  |  |  | 18 |  |  | 18 |
| 1903 | *Schinopsis lorentzii+Sarcomphalus mistol+Aspidosperma quebracho-blanco* |  |  |  |  |  | 5 |  |  | 5 |
| 1904 | *Schinopsis lorentzii+Sarcomphalus mistol+Aspidosperma quebracho-blanco+Libidibia paraguariensis* |  |  |  |  |  | 2 |  |  | 2 |
| 1905 | *Schinopsis lorentzii+Sarcomphalus mistol+Aspidosperma quebracho-blanco+Salta triflora* |  |  |  |  |  | 1 |  |  | 1 |
| 1906 | *Schinopsis lorentzii+Sarcomphalus mistol+Aspidosperma quebracho-blanco+Sideroxylon obtusifolium* |  |  |  |  |  | 1 |  |  | 1 |
| 1907 | *Schinopsis lorentzii+Sarcomphalus mistol+Aspidosperma quebracho-blanco+Trithrinax schyzophylla var. schyzophylla* |  |  |  |  |  | 1 |  |  | 1 |
| 1908 | *Schinopsis lorentzii+Sarcomphalus mistol+Bougainvillea praecox* |  |  |  |  |  | 1 |  |  | 1 |
| 1909 | *Schinopsis lorentzii+Sarcomphalus mistol+Celtis iguanaea* |  |  |  |  |  | 1 |  |  | 1 |
| 1910 | *Schinopsis lorentzii+Sarcomphalus mistol+Libidibia paraguariensis+Salta triflora* |  |  |  |  |  | 1 |  |  | 1 |
| 1911 | *Schinopsis lorentzii+Sarcomphalus mistol+Parkinsonia praecox* |  |  |  |  |  | 1 |  |  | 1 |
| 1912 | *Schinopsis lorentzii+Sarcomphalus mistol+Prosopis nigra* |  |  |  |  |  | 2 |  |  | 2 |
| 1913 | *Schinopsis lorentzii+Sarcomphalus mistol+Prosopis nigra+Libidibia paraguariensis* |  |  |  |  |  | 1 |  |  | 1 |
| 1914 | *Schinopsis lorentzii+Sarcomphalus mistol+Ruprechtia apetala* |  |  |  |  |  | 1 |  |  | 1 |
| 1915 | *Schinopsis lorentzii+Sarcomphalus mistol+Salta triflora* |  |  |  |  |  | 3 |  |  | 3 |
| 1916 | *Schinopsis lorentzii+Sarcomphalus mistol+Sarcotoxicum salicifolium* |  |  |  |  |  | 1 |  |  | 1 |
| 1917 | *Schinopsis lorentzii+Sarcomphalus mistol+Senegalia praecox+Cordia americana* |  |  |  |  |  | 1 |  |  | 1 |
| 1918 | *Schinopsis lorentzii+Sarcomphalus mistol+Sideroxylon obtusifolium* |  |  |  |  |  | 1 |  |  | 1 |
| 1919 | *Schinopsis lorentzii+Sarcomphalus mistol+Tabebuia nodosa* |  |  |  |  |  | 1 |  |  | 1 |
| 1920 | *Schinopsis lorentzii+Sarcomphalus mistol+Tabebuia nodosa+Aspidosperma quebracho-blanco* |  |  |  |  |  | 1 |  |  | 1 |
| 1921 | *Schinopsis lorentzii+Sarcomphalus mistol+Tabebuia nodosa+Salta triflora* |  |  |  |  |  | 1 |  |  | 1 |
| 1922 | *Schinopsis lorentzii+Schinus fasciculatus* |  |  |  |  |  | 1 |  |  | 1 |
| 1923 | *Schinopsis lorentzii+Senegalia gilliesii* |  |  |  |  |  | 1 |  |  | 1 |
| 1924 | *Schinopsis lorentzii+Senegalia gilliesii+Aspidosperma quebracho-blanco* |  |  |  |  |  | 1 |  |  | 1 |
| 1925 | *Schinopsis lorentzii+Senegalia praecox* |  |  |  |  |  | 3 |  |  | 3 |
| 1926 | *Schinopsis lorentzii+Senegalia praecox+Aspidosperma quebracho-blanco* |  |  |  |  |  | 1 |  |  | 1 |
| 1927 | *Schinopsis lorentzii+Senegalia praecox+Libidibia paraguariensis* |  |  |  |  |  | 1 |  |  | 1 |
| 1928 | *Schinopsis lorentzii+Senegalia praecox+Prosopis kuntzei+Libidibia paraguariensis* |  |  |  |  |  | 1 |  |  | 1 |
| 1929 | *Schinopsis lorentzii+Senegalia praecox+Salta triflora* |  |  |  |  |  | 1 |  |  | 1 |
| 1930 | *Schinopsis lorentzii+Sideroxylon obtusifolium+Aspidosperma quebracho-blanco* |  |  |  |  |  | 1 |  |  | 1 |
| 1931 | *Schinopsis lorentzii+Sideroxylon obtusifolium+Sarcomphalus mistol+Gonopterodendron sarmientoi* |  |  |  |  |  | 1 |  |  | 1 |
| 1932 | *Schinopsis lorentzii+Sideroxylon obtusifolium+Sarcomphalus mistol+Senegalia praecox* |  |  |  |  |  | 1 |  |  | 1 |
| 1933 | *Schinopsis lorentzii+Tabebuia nodosa* |  |  |  |  |  | 1 |  |  | 1 |
| 1934 | *Schinopsis lorentzii+Tabebuia nodosa+Aspidosperma quebracho-blanco+Salta triflora* |  |  |  |  |  | 1 |  |  | 1 |
| 1935 | *Schinopsis lorentzii+Tabebuia nodosa+Aspidosperma quebracho-blanco+Sarcotoxicum salicifolium* |  |  |  |  |  | 1 |  |  | 1 |
| 1936 | *Schinopsis lorentzii+Tabebuia nodosa+Libidibia paraguariensis* |  |  |  |  |  | 1 |  |  | 1 |
| 1937 | *Schinopsis lorentzii+Terminalia triflora+Cordia americana+Scutia buxifolia* |  |  |  |  |  |  |  | 1 | 1 |
| 1938 | *Schinopsis lorentzii+Ximenia americana+Aspidosperma quebracho-blanco+Bougainvillea praecox* |  |  |  |  |  | 1 |  |  | 1 |
| ***Tabebuia nodosa + others*** | |  |  |  |  |  |  |  |  |  |
| 1939 | *Tabebuia nodosa* |  |  |  |  |  | 10 |  |  | 10 |
| 1940 | *Tabebuia nodosa+Acanthosyris falcata+Sarcomphalus mistol* |  |  |  |  |  | 1 |  |  | 1 |
| 1941 | *Tabebuia nodosa+Aspidosperma quebracho-blanco+Bougainvillea praecox* |  |  |  |  |  | 1 |  |  | 1 |
| 1942 | *Tabebuia nodosa+Aspidosperma quebracho-blanco+Gonopterodendron sarmientoi* |  |  |  |  |  | 3 |  |  | 3 |
| 1943 | *Tabebuia nodosa+Aspidosperma quebracho-blanco+Gonopterodendron sarmientoi+Sarcomphalus mistol* |  |  |  |  |  | 1 |  |  | 1 |
| 1944 | *Tabebuia nodosa+Aspidosperma quebracho-blanco+Parkinsonia praecox* |  |  |  |  |  | 1 |  |  | 1 |
| 1945 | *Tabebuia nodosa+Aspidosperma quebracho-blanco+Prosopis kuntzei* |  |  |  |  |  | 1 |  |  | 1 |
| 1946 | *Tabebuia nodosa+Aspidosperma quebracho-blanco+Salta triflora* |  |  |  |  |  | 1 |  |  | 1 |
| 1947 | *Tabebuia nodosa+Aspidosperma quebracho-blanco+Salta triflora+Gonopterodendron sarmientoi* |  |  |  |  |  | 2 |  |  | 2 |
| 1948 | *Tabebuia nodosa+Aspidosperma quebracho-blanco+Sarcomphalus mistol* |  |  |  |  |  | 1 |  |  | 1 |
| 1949 | *Tabebuia nodosa+Aspidosperma quebracho-blanco+Schinopsis lorentzii* |  |  |  |  |  | 1 |  |  | 1 |
| 1950 | *Tabebuia nodosa+Aspidosperma quebracho-blanco+Senegalia gilliesii+Schinopsis lorentzii* |  |  |  |  |  | 1 |  |  | 1 |
| 1951 | *Tabebuia nodosa+Bougainvillea campanulata+Vachellia caven* |  |  |  |  |  | 1 |  |  | 1 |
| 1952 | *Tabebuia nodosa+Bougainvillea praecox+Aspidosperma quebracho-blanco* |  |  |  |  |  | 1 |  |  | 1 |
| 1953 | *Tabebuia nodosa+Calycophyllum multiflorum* |  |  |  |  |  | 1 |  |  | 1 |
| 1954 | *Tabebuia nodosa+Copernicia alba* |  |  |  |  |  | 1 |  |  | 1 |
| 1955 | *Tabebuia nodosa+Copernicia alba+Cynophalla retusa* |  |  |  |  |  | 1 |  |  | 1 |
| 1956 | *Tabebuia nodosa+Copernicia alba+Geoffroea decorticans* |  |  |  |  |  | 1 |  |  | 1 |
| 1957 | *Tabebuia nodosa+Copernicia alba+Sideroxylon obtusifolium+Libidibia paraguariensis* |  |  |  |  |  | 1 |  |  | 1 |
| 1958 | *Tabebuia nodosa+Geoffroea decorticans* |  |  |  |  |  | 2 |  |  | 2 |
| 1959 | *Tabebuia nodosa+Gonopterodendron sarmientoi* |  |  |  |  |  | 1 |  |  | 1 |
| 1960 | *Tabebuia nodosa+Gonopterodendron sarmientoi+Salta triflora+Aspidosperma triternatum* |  |  |  |  |  | 1 |  |  | 1 |
| 1961 | *Tabebuia nodosa+Gonopterodendron sarmientoi+Salta triflora+Prosopis ruscifolia* |  |  |  |  |  | 1 |  |  | 1 |
| 1962 | *Tabebuia nodosa+Libidibia paraguariensis* |  |  |  |  |  | 2 |  |  | 2 |
| 1963 | *Tabebuia nodosa+Libidibia paraguariensis+Prosopis alba* |  |  |  |  |  | 1 |  |  | 1 |
| 1964 | *Tabebuia nodosa+Libidibia paraguariensis+Sarcomphalus mistol+Salta triflora* |  |  |  |  |  | 1 |  |  | 1 |
| 1965 | *Tabebuia nodosa+Maytenus vitis-idaea+Prosopis ruscifolia* |  |  |  |  |  | 1 |  |  | 1 |
| 1966 | *Tabebuia nodosa+Mimozyganthus carinatus* |  |  |  |  |  | 4 |  |  | 4 |
| 1967 | *Tabebuia nodosa+Parkinsonia praecox* |  |  |  |  |  | 1 |  |  | 1 |
| 1968 | *Tabebuia nodosa+Prosopis alba* |  |  |  |  |  | 2 |  |  | 2 |
| 1969 | *Tabebuia nodosa+Prosopis nigra* |  |  |  |  |  | 3 |  |  | 3 |
| 1970 | *Tabebuia nodosa+Prosopis nigra+Salta triflora* |  |  |  |  |  | 1 |  |  | 1 |
| 1971 | *Tabebuia nodosa+Prosopis nigra+Schinopsis balansae* |  |  |  |  |  | 2 |  |  | 2 |
| 1972 | *Tabebuia nodosa+Prosopis ruscifolia* |  |  |  |  |  | 8 |  |  | 8 |
| 1973 | *Tabebuia nodosa+Prosopis ruscifolia+Cynophalla retusa+Aspidosperma quebracho-blanco* |  |  |  |  |  | 1 |  |  | 1 |
| 1974 | *Tabebuia nodosa+Prosopis ruscifolia+Gonopterodendron sarmientoi* |  |  |  |  |  | 1 |  |  | 1 |
| 1975 | *Tabebuia nodosa+Prosopis ruscifolia+Prosopis nigra* |  |  |  |  |  | 1 |  |  | 1 |
| 1976 | *Tabebuia nodosa+Prosopis ruscifolia+Salta triflora* |  |  |  |  |  | 1 |  |  | 1 |
| 1977 | *Tabebuia nodosa+Salta triflora* |  |  |  |  |  | 2 |  |  | 2 |
| 1978 | *Tabebuia nodosa+Salta triflora+Aspidosperma triternatum* |  |  |  |  |  | 1 |  |  | 1 |
| 1979 | *Tabebuia nodosa+Salta triflora+Gonopterodendron sarmientoi* |  |  |  |  |  | 1 |  |  | 1 |
| 1980 | *Tabebuia nodosa+Salta triflora+Pisonia zapallo* |  |  |  |  |  | 1 |  |  | 1 |
| 1981 | *Tabebuia nodosa+Salta triflora+Sarcomphalus mistol* |  |  |  |  |  | 1 |  |  | 1 |
| 1982 | *Tabebuia nodosa+Salta triflora+Schinopsis lorentzii* |  |  |  |  |  | 1 |  |  | 1 |
| 1983 | *Tabebuia nodosa+Salta triflora+Schinopsis lorentzii+Aspidosperma quebracho-blanco* |  |  |  |  |  | 2 |  |  | 2 |
| 1984 | *Tabebuia nodosa+Salta triflora+Senegalia praecox+Schinopsis lorentzii* |  |  |  |  |  | 1 |  |  | 1 |
| 1985 | *Tabebuia nodosa+Sarcomphalus mistol* |  |  |  |  |  | 1 |  |  | 1 |
| 1986 | *Tabebuia nodosa+Sarcomphalus mistol+Prosopis nigra+Libidibia paraguariensis* |  |  |  |  |  | 1 |  |  | 1 |
| 1987 | *Tabebuia nodosa+Sarcomphalus mistol+Schinopsis lorentzii* |  |  |  |  |  | 1 |  |  | 1 |
| 1988 | *Tabebuia nodosa+Schinopsis balansae+Prosopis alba+Aspidosperma quebracho-blanco* |  |  |  |  |  | 1 |  |  | 1 |
| 1989 | *Tabebuia nodosa+Schinopsis lorentzii* |  |  |  |  |  | 3 |  |  | 3 |
| 1990 | *Tabebuia nodosa+Schinopsis lorentzii+Aspidosperma quebracho-blanco* |  |  |  |  |  | 2 |  |  | 2 |
| 1991 | *Tabebuia nodosa+Schinopsis lorentzii+Bougainvillea praecox* |  |  |  |  |  | 1 |  |  | 1 |
| 1992 | *Tabebuia nodosa+Schinopsis lorentzii+Sarcomphalus mistol* |  |  |  |  |  | 2 |  |  | 2 |
| 1993 | *Tabebuia nodosa+Vachellia caven* |  |  |  |  |  | 1 |  |  | 1 |
| ***Urticaceae + others*** | |  |  |  |  |  |  |  |  |  |
| 1994 | *Cecropia pachystachya+Alchornea glandulosa+Ocotea puberula* |  |  |  |  |  |  | 1 |  | 1 |
| 1995 | *Cecropia pachystachya+Trema micrantha+Chrysophyllum gonocarpum* |  |  |  |  |  |  | 1 |  | 1 |
| ***Zanthoxylum + others*** | |  |  |  |  |  |  |  |  |  |
| 1996 | *Zanthoxylum coco* |  |  |  |  |  | 1 |  | 1 | 2 |
| 1997 | *Zanthoxylum coco+Juglans australis+Allophylus edulis+Parasenegalia visco* |  |  |  |  |  | 1 |  |  | 1 |
| ***Zygophyllaceae + others*** | |  |  |  |  |  |  |  |  |  |
| 1998 | *Bulnesia retama* |  |  |  | 4 |  |  |  |  | 4 |
| 1999 | *Bulnesia retama+Prosopis chilensis* |  |  |  | 1 |  |  |  |  | 1 |
| 2000 | *Bulnesia retama+Prosopis flexuosa* |  |  |  | 2 |  |  |  |  | 2 |
| 2001 | *Bulnesia retama+Vachellia aroma* |  |  |  | 1 |  |  |  |  | 1 |
| 2002 | *Celtis ehrenbergiana+Bulnesia retama+Geoffroea decorticans* |  |  |  | 1 |  |  |  |  | 1 |
| 2003 | *Senegalia gilliesii+Bulnesia retama* |  |  |  | 1 |  |  |  |  | 1 |
